# Supplementary material for: FeCl3-catalyzed AB2 three-component [3 + 3] annulation: an efficient access to functionalized indolo[3,2-b]carbazoles
Source: Royal Society of Chemistry journal article supplement (doi:10.1039/d3qo01529g), 2023-01-01

## FeCl<sub>3</sub>-Catalyzed AB<sub>2</sub> Three-component [3 + 3] Annulation: An Efficient Access to Functionalized Indolo[3,2-*b*]carbazoles

Gowsia Jan,<sup>a</sup> Diksha Rajput,<sup>a</sup> Anish Gupta,<sup>a</sup> Dolma Tsering,<sup>b</sup> Muthu Karuppasamy,<sup>a,c</sup> Kamal K. Kapoor<sup>b</sup> and Vellaisamy Sridharan\*<sup>a</sup>

<sup>a</sup>Department of Chemistry and Chemical Sciences, Central University of Jammu, Rahya-Suchani (Bagla), District-Samba, Jammu-181143, J&K, India. E-mail: vesridharan@gmail.com; sridharan.che@cujammu.ac.in

<sup>b</sup>Department of Chemistry, University of Jammu, Jammu-180006, J&K, India

<sup>c</sup>Department of Chemistry, Thiagarajar College, Madurai-625009, India

### Supporting Information

#### Table of Contents

|    |                                                                                                             |     |
|----|-------------------------------------------------------------------------------------------------------------|-----|
| 1  | General Information                                                                                         | S2  |
| 2  | Synthesis of 1 <i>H</i> -Indole-2-carbaldehyde Derivatives <b>1a-c</b>                                      | S2  |
| 3  | General Procedure for the Synthesis of <i>N</i> -Substituted 1 <i>H</i> -Indole-2-carbaldehydes <b>1d-f</b> | S2  |
| 4  | General Procedure for the Synthesis of 3-Methyl-1-Aryl-1 <i>H</i> -pyrazol-5-amines <b>2</b>                | S3  |
| 5  | General Procedure for the Synthesis of Indolo[3,2- <i>b</i> ]carbazoles <b>3</b>                            | S4  |
| 6  | General Procedure for the Synthesis of Compounds <b>5</b>                                                   | S12 |
| 7  | X-Ray crystallography data of compounds <b>3f</b>                                                           | S14 |
| 8  | Absorption and Emission Spectra of Compound <b>3a</b>                                                       | S16 |
| 9  | HPLC Resolution of Compound <b>3a</b>                                                                       | S18 |
| 10 | Copies of <sup>1</sup> H and <sup>13</sup> C NMR Spectra                                                    | S19 |

## 1. General Information

All chemicals were purchased from various commercial suppliers including Alfa Aesar, Sigma-Aldrich, Merck, SRL, SDFine, CDH and used without any further purification. All the reactions were carried out in oven dried glassware. The reactions were monitored by thin layer chromatography using Merck silica gel 60F254 and visualized by UV detection or using molecular iodine or *p*-anisaldehyde stain. Silica gel (230-400 mesh) was used for flash column chromatography. Melting points were recorded on a melting point apparatus in capillaries and are uncorrected.  $^1\text{H}$  and  $^{13}\text{C}\{^1\text{H}\}$ -NMR spectra were recorded in  $\text{CDCl}_3$  and  $\text{DMSO-d}_6$  at room temperature on a Bruker AC-400 spectrometer operating at 400 MHz for  $^1\text{H}$  and 101 MHz for  $^{13}\text{C}\{^1\text{H}\}$ . Chemical shifts ( $\delta$ ) are expressed in ppm using TMS as an internal standard and coupling constants ( $J$ ) are given in Hz. Infrared (IR) spectra were recorded on Perkin-Elmer FTIR spectrophotometer. Elemental analyses were determined at the CAI de Microanálisis Elemental, Universidad Complutense, by using a Leco 932 CHNS combustion microanalyzer.

## 2. Synthesis of 1*H*-Indole-2-carbaldehyde Derivatives 1a-c

Compounds **1a-c** were synthesized using the literature procedure in a 13 mmol scale.<sup>1</sup>

### 1*H*-Indole-2-carbaldehyde (1a):<sup>1</sup>

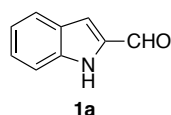

Purification by flash column chromatography on silica gel eluting with petroleum ether–ethyl acetate mixture (90:10 to 85:15, v/v) afforded the title compound as white solid; mp: 143-145 °C; yield: 57% (0.843 g).

### 5-Chloro-1*H*-indole-2-carbaldehyde (1b):<sup>1</sup>

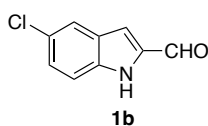

Purification by flash column chromatography on silica gel eluting with petroleum ether–ethyl acetate mixture (90:10 to 85:15, v/v) afforded the title compound as white solid; mp: 198-200 °C; yield: 69% (1.264 g).

### 5-Methyl-1*H*-indole-2-carbaldehyde (1c):<sup>2</sup>

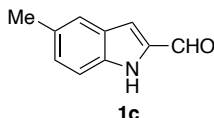

Purification by flash column chromatography on silica gel eluting with petroleum ether–ethyl acetate mixture (90:10 to 85:15, v/v) afforded the title compound as white solid; mp: 157-159 °C; yield: 67% (1.087 g).

## 3. General Procedure for the Synthesis of *N*-Substituted 1*H*-Indole-2-carbaldehydes 1d-f

Compounds **1d-f** were synthesized using the literature procedure in a 7 mmol scale.<sup>2</sup>

### 1-(Prop-2-yn-1-yl)-1*H*-indole-2-carbaldehyde (1d):<sup>2</sup>

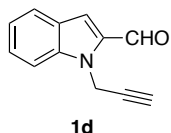

Purification by flash column chromatography on silica gel eluting with petroleum ether–ethyl acetate mixture (90:10 to 85:15, v/v) afforded the title compound as white solid; mp: 133-135 °C; yield: 84% (1.060 g).

### 1-Allyl-1*H*-indole-2-carbaldehyde (1e):<sup>2</sup>

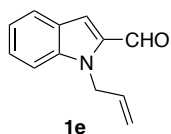

Purification by flash column chromatography on silica gel eluting with petroleum ether–ethyl acetate mixture (90:10 to 85:15, v/v) afforded the title compound as colourless solid; mp: 39-41 °C; yield: 76% (0.969 g).

<sup>1</sup>Liu, Y.; Luo, G.; Yang, X.; Jiang, S.; Xue, W.; Chi, Y. R.; Jin, Z. *Angew. Chem., Int. Ed.* **2020**, *59*, 442–448.

<sup>2</sup>Wang, L.-X.; Qiu, B.; An, X.-D.; Dong, P.-Z.; Liu, R.-B.; Xiao, J. *Green Chem.* **2021**, *23*, 8181–8186.

### 1-Benzyl-1H-indole-2-carbaldehyde (1f):<sup>2</sup>

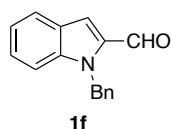

Purification by flash column chromatography on silica gel eluting with petroleum ether–ethyl acetate mixture (90:10 to 85:15, v/v) afforded the title compound as yellow solid; mp: 71-73 °C; yield: 91% (1.475 g).

### 4. General Procedure for the Synthesis of 3-Methyl-1-aryl-1H-pyrazol-5-amines 2

Compounds **2** were synthesized using the literature procedure in a 29 mmol scale.<sup>3</sup>

### 3-Methyl-1-phenyl-1H-pyrazol-5-amine (2a):<sup>4</sup>

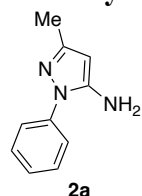

Purification by flash column chromatography on silica gel eluting with petroleum ether–ethyl acetate mixture (90:10 to 70:30, v/v) afforded the title compound as white solid; mp: 107-109 °C; yield: 95% (3.949 g).

### 3-Methyl-1-(p-tolyl)-1H-pyrazol-5-amine (2b):<sup>4</sup>

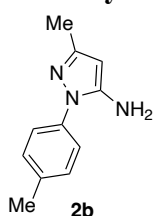

Purification by flash column chromatography on silica gel eluting with petroleum ether–ethyl acetate mixture (90:10 to 70:30, v/v) afforded the title compound as white solid; mp: 121-123 °C; yield: 88% (3.954 g).

### 1-(2-Bromophenyl)-3-methyl-1H-pyrazol-5-amine (2c):

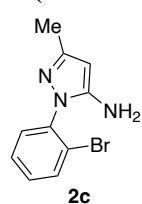

Purification by flash column chromatography on silica gel eluting with petroleum ether–ethyl acetate mixture (90:10 to 70:30, v/v) afforded the title compound as colorless viscous liquid; yield: 73% (4.417 g); IR (neat): 3414.2, 1617.7, 1520.8, 1076.1.  $\text{cm}^{-1}$ ;  $^1\text{H}$  NMR (400 MHz,  $\text{CDCl}_3$ )  $\delta$  7.62 (dd,  $J = 8.0, 1.1$  Hz, 1H), 7.40-7.32 (m, 2H), 7.25-7.28 (m, 1H), 5.37 (s, 1H), 3.51 (s, 2H), 2.16 (s, 3H);  $^{13}\text{C}$  NMR (101 MHz,  $\text{CDCl}_3$ )  $\delta$  149.9, 146.4, 137.5, 133.5, 130.7, 130.5, 128.6, 122.4, 90.1, 14.0; Anal Calcd for  $\text{C}_{10}\text{H}_{10}\text{BrN}_3$  : Calcd: C, 47.64; H, 4.00; N, 16.67. Found: C, 46.85; H, 4.03; N, 16.69.

### 3-Methyl-1-(3-nitrophenyl)-1H-pyrazol-5-amine (2d):<sup>4</sup>

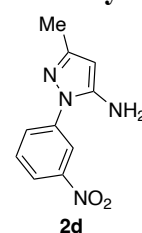

Purification by flash column chromatography on silica gel eluting with petroleum ether–ethyl acetate mixture (90:10 to 70:30, v/v) afforded the title compound as yellow solid; mp: 105-107 °C; yield: 76% (3.980 g).

<sup>3</sup> Marinozzi, M.; Marcelli, G.; Carotti, A.; Natalini, B. *RSC Adv.* **2014**, *4*, 7019–7023

<sup>4</sup> Muthukrishnan, I.; Vachan, B. S.; Karuppasamy, M.; Eniyaval, A.; Maheswari, C. U.; Nagarajan, S.; Menéndez, J. C.; Sridharan, V. *Org. Biomol. Chem.* **2019**, *17*, 6872–6879.

#### 1-(3-Chlorophenyl)-3-methyl-1H-pyrazol-5-amine (2e):<sup>4</sup>

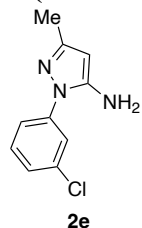

Purification by flash column chromatography on silica gel eluting with petroleum ether–ethyl acetate mixture (90:10 to 70:30, v/v) afforded the title compound as white solid; mp: 137-139 °C; yield: 72% (3.588 g).

### 5. General Procedure for the Synthesis of Indolo[3,2-*b*]carbazoles 3

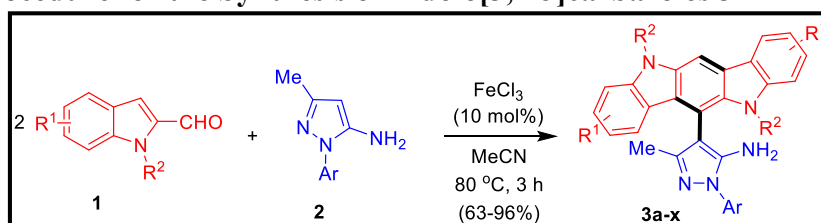

To a stirred solution of aldehyde **1** (1 mmol, 2.0 equiv) and 3-methyl-1-aryl-1H-pyrazol-5-amine **2** (0.5 mmol, 1.0 equiv) in MeCN (3 mL) was added FeCl<sub>3</sub> (10 mol%). The resulting mixture was stirred at 80 °C for 3 h and after completion of the reaction, as monitored by TLC, the reaction mixture was cooled to room temperature and diluted with water. The aqueous suspension was extracted with DCM (2 x 20 mL), washed with water and brine. The organic layer was dried over anhydrous Na<sub>2</sub>SO<sub>4</sub> and concentrated under reduced pressure. The crude product was purified by flash column chromatography using petroleum ether-ethyl acetate mixture as eluent (90:10 to 85:15, v/v) to obtain compounds **3a-x**.

#### 4-(5,11-Dihydroindolo[3,2-*b*]carbazol-6-yl)-3-methyl-1-phenyl-1H-pyrazol-5-amine (3a):

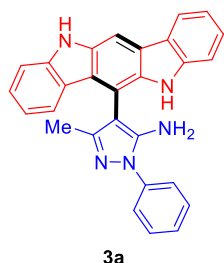

Purification by flash column chromatography on silica gel eluting with petroleum ether–ethyl acetate mixture (90:10 to 85:15, v/v) afforded the title compound as off-white solid; mp: 317-319 °C; yield: 0.198 g, 93% (1.945 g, 91%)<sup>#</sup>; IR (neat): 3397.3, 2923.3, 1729.3, 1618.8, 1527.2, 1453.8, 1348.3, 1283.2, 1059.8. cm<sup>-1</sup>; <sup>1</sup>H NMR (400 MHz, DMSO-*d*<sub>6</sub>) δ 11.14 (s, 1H), 10.60 (s, 1H), 8.23 (d, *J* = 7.7 Hz, 1H), 8.14 (s, 1H), 7.86 (d, *J* = 7.8 Hz, 2H), 7.56 (t, *J* = 6.9 Hz, 3H), 7.48 (t, *J* = 7.9 Hz, 2H), 7.36 (t, *J* = 7.6 Hz, 3H), 7.13 (t, *J* = 7.4 Hz, 1H), 7.00 (t, *J* = 7.5 Hz, 1H), 4.83 (s, 2H), 1.96 (s, 3H); <sup>13</sup>C NMR (101 MHz, DMSO-*d*<sub>6</sub>) δ\* 147.9, 145.0, 141.7, 140.2,

135.9, 135.4, 129.6, 126.3, 125.7, 125.5, 123.4, 123.3, 123.1, 122.7, 122.0, 121.5, 120.6, 118.0, 117.5, 111.4, 110.6, 107.9, 100.1, 99.3, 13.5; Anal Calcd for C<sub>28</sub>H<sub>21</sub>N<sub>5</sub>: Calcd: C, 78.67; H, 4.95; N, 16.38. Found: C, 78.55; H, 5.01; N, 16.44. \*One aromatic carbon is merged with others.

<sup>#</sup>Yield obtained from 10 mmol scale reaction.

#### 4-(5,11-Dihydroindolo[3,2-*b*]carbazol-6-yl)-3-methyl-1-(*p*-tolyl)-1H-pyrazol-5-amine (3b):

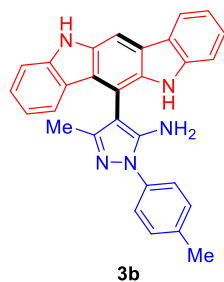

Purification by flash column chromatography on silica gel eluting with petroleum ether–ethyl acetate mixture (90:10 to 85:15, v/v) afforded the title compound as pale yellow solid; mp: 290-292 °C; yield: 0.194 g, 88%; IR (neat): 3398.3, 2922.2, 1617.8, 1595.2, 1528.5, 1453.9, 1349.6, 1294.5. cm<sup>-1</sup>; <sup>1</sup>H NMR (400 MHz, DMSO-*d*<sub>6</sub>) δ 11.13 (s, 1H), 10.60 (s, 1H), 8.22 (d, *J* = 7.8 Hz, 1H), 8.14 (s, 1H), 7.72 (d, *J* = 8.3 Hz, 2H), 7.56 (d, *J* = 7.8 Hz, 1H), 7.48 (t, *J* = 8.5 Hz, 2H), 7.39-7.30 (m, 4H), 7.13 (t, *J* = 7.3 Hz, 1H), 6.99 (t, *J* = 7.4 Hz, 1H), 4.76 (s, 2H), 2.40 (s, 3H), 1.95 (s, 3H); <sup>13</sup>C NMR (101 MHz, DMSO-*d*<sub>6</sub>) δ\* 147.6, 144.9, 141.7, 137.7, 135.9,

135.6, 135.5, 130.0, 125.7, 125.4, 123.4, 123.3, 123.1, 122.7, 122.0, 121.9, 120.6, 118.0 117.5, 111.4, 110.6, 108.0, 100.0, 99.1, 21.1, 13.5; Anal Calcd for C<sub>29</sub>H<sub>23</sub>N<sub>5</sub>: Calcd: C, 78.89; H, 5.25; N, 15.86. Found: C, 78.68; H, 5.21; N, 15.79. \*One aromatic carbon is merged with others.

**1-(3-Chlorophenyl)-4-(5,11-dihydroindolo[3,2-*b*]carbazol-6-yl)-3-methyl-1*H*-pyrazol-5-amine (3c):**

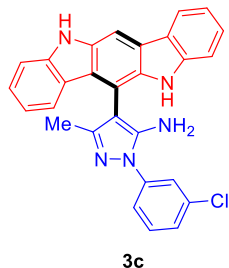

Purification by flash column chromatography on silica gel eluting with petroleum ether–ethyl acetate mixture (90:10 to 85:15, v/v) afforded the title compound as off-white solid; mp: 298-300 °C; yield: 0.164 g, 71%; IR (neat): 3414.2, 2922.0, 1745.3, 1596.3, 1520.8, 1453.7, 1319.5, 1259.8, 1099.7. cm<sup>-1</sup>; <sup>1</sup>H NMR (400 MHz, DMSO-*d*<sub>6</sub>) δ 11.15 (s, 1H), 10.61 (s, 1H), 8.23 (d, *J* = 7.5 Hz, 1H), 8.15 (s, 1H), 7.95 (s, 1H), 7.87 (d, *J* = 7.7 Hz, 1H), 7.60-7.53 (m, 2H), 7.50-7.45 (m, 2H), 7.41-7.31 (m, 3H), 7.14 (t, *J* = 7.3 Hz, 1H), 7.00 (t, *J* = 7.3 Hz, 1H), 5.02 (s, 2H), 1.95 (s, 3H); <sup>13</sup>C NMR (101 MHz, DMSO-*d*<sub>6</sub>) δ\* 148.8, 145.5, 141.7, 141.5, 135.9, 135.5, 133.8, 131.2, 125.8, 125.7, 125.5, 123.3, 123.2, 122.7, 122.2, 122.0, 121.7, 121.1, 120.6, 118.0, 111.3, 110.6, 107.5, 100.2, 99.9, 13.5; Anal Calcd for C<sub>28</sub>H<sub>20</sub>ClN<sub>5</sub>: Calcd: C, 72.80; H, 4.36; N, 15.16. Found: C, 72.58; H, 4.27; N, 15.10. \*Two aromatic carbon are merged with others.

**1-(2-Bromophenyl)-4-(5,11-dihydroindolo[3,2-*b*]carbazol-6-yl)-3-methyl-1*H*-pyrazol-5-amine (3d):**

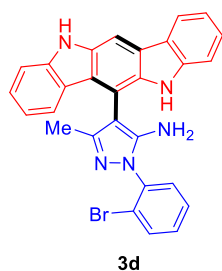

Purification by flash column chromatography on silica gel eluting with petroleum ether–ethyl acetate mixture (90:10 to 85:15, v/v) afforded the title compound as off-white solid; mp: 230-232 °C; yield: 0.222 g, 88%; IR (neat): 3345.1, 2907.0, 1625.7, 1520.8, 1461.1, 1379.1, 1312.0, 1265.7, 1085.3. cm<sup>-1</sup>; <sup>1</sup>H NMR (400 MHz, DMSO-*d*<sub>6</sub>) δ 11.11 (s, 1H), 10.48 (s, 1H), 8.23 (d, *J* = 7.0 Hz, 1H), 8.13 (s, 1H), 7.91 (d, *J* = 7.4 Hz, 1H), 7.83 (d, *J* = 7.1 Hz, 1H), 7.74-7.61 (m, 2H), 7.56-7.44 (m, 3H), 7.41-7.31 (m, 2H), 7.14 (t, *J* = 7.1 Hz, 1H), 6.9 (t, *J* = 7.0 Hz, 1H), 4.64 (s, 2H), 1.96 (s, 3H); <sup>13</sup>C NMR (101 MHz, DMSO-*d*<sub>6</sub>) δ 147.7, 146.0, 141.7, 141.6, 138.4, 135.9, 135.4, 133.9, 131.2, 131.1, 129.1, 125.7, 125.4, 123.4, 123.3, 122.7, 122.6, 122.5, 122.2, 120.6, 118.0, 117.9, 111.4, 110.4, 108.3, 99.8, 96.8, 13.6; Anal Calcd for C<sub>28</sub>H<sub>20</sub>BrN<sub>5</sub>: Calcd: C, 66.41; H, 3.98; N, 13.83 Found: C, 66.14; H, 3.96; N, 13.77.

**4-(5,11-Dihydroindolo[3,2-*b*]carbazol-6-yl)-3-methyl-1-(3-nitrophenyl)-1*H*-pyrazol-5-amine (3e):**

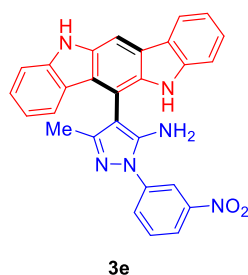

Purification by flash column chromatography on silica gel eluting with petroleum ether–ethyl acetate mixture (90:10 to 85:15, v/v) afforded the title compound as yellow solid; mp: 240-242 °C; yield: 0.215 g, 91%; IR (neat): 3399.4, 3324.7, 1617.8, 1583.4, 1528.3, 1453.8, 1349.4, 1263.4, 1095.4. cm<sup>-1</sup>; <sup>1</sup>H NMR (400 MHz, DMSO-*d*<sub>6</sub>) δ 11.16 (s, 1H), 10.65 (s, 1H), 8.73 (t, *J* = 2.0 Hz, 1H), 8.37 (dd, *J* = 8.1, 1.2 Hz, 1H), 8.24 (d, *J* = 7.7 Hz, 1H), 8.21-8.14 (m, 2H), 7.84 (t, *J* = 8.2 Hz, 1H), 7.57 (d, *J* = 7.8 Hz, 1H), 7.49 (d, *J* = 8.0 Hz, 2H), 7.38-7.32 (m, 2H), 7.14 (t, *J* = 7.2 Hz, 1H), 7.01 (t, *J* = 7.3 Hz, 1H), 5.22 (s, 2H), 1.97 (s, 3H); <sup>13</sup>C NMR (101 MHz, DMSO-*d*<sub>6</sub>) δ\* 149.5, 148.7, 145.9, 141.7, 141.1, 135.9, 135.5, 131.1, 128.5, 125.8, 125.5, 123.3, 123.2, 122.8, 122.1, 121.7, 120.7, 120.4, 118.1, 116.9, 111.3, 110.7, 107.3, 100.3, 100.1, 13.5; Anal Calcd for C<sub>28</sub>H<sub>20</sub>N<sub>6</sub>O<sub>2</sub>: Calcd: C, 71.18; H, 4.27; N, 17.79; Found: C, 71.02; H, 4.19; N, 17.85. \*Two aromatic carbon are merged with others.

**4-(5,11-Di(prop-2-yn-1-yl)-5,11-dihydroindolo[3,2-*b*]carbazol-6-yl)-3-methyl-1-phenyl-1*H*-pyrazol-5-amine (3f):**

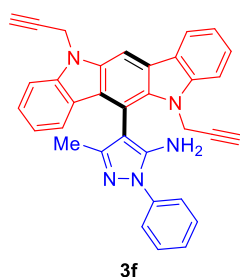

Purification by flash column chromatography on silica gel eluting with petroleum ether–ethyl acetate mixture (90:10 to 85:15, v/v) afforded the title compound as off-white solid; mp: 245–247 °C; yield: 0.224 g, 89%; IR (neat): 3280.1, 2922.2, 2847.7, 1729.5, 1595.3, 1513.3, 1453.7, 1319.5, 1177.8, 1043.7.  $\text{cm}^{-1}$ ;  $^1\text{H}$  NMR (400 MHz,  $\text{CDCl}_3$ )  $\delta$  8.27 (d,  $J = 7.7$  Hz, 1H), 8.19 (s, 1H), 7.82 (d,  $J = 7.7$  Hz, 2H), 7.60–7.46 (m, 7H), 7.42 (t,  $J = 7.4$  Hz, 1H), 7.35 (t,  $J = 7.1$  Hz, 1H), 7.16–7.10 (m, 1H), 5.22 (d,  $J = 2.2$  Hz, 2H), 5.13 (dd,  $J = 18.3, 2.2$  Hz, 1H), 5.06 (dd,  $J = 18.3, 2.2$  Hz, 1H), 3.70 (s, 2H), 2.34 (t,  $J = 2.1$  Hz, 1H), 2.17 (s, 3H), 2.10 (t,  $J = 2.0$  Hz, 1H);  $^{13}\text{C}$  NMR (101 MHz,  $\text{CDCl}_3$ )  $\delta$  149.3, 143.6, 142.5, 141.1, 139.0, 135.8, 134.7, 129.6, 127.3, 126.4, 125.9, 124.4, 124.0, 123.7, 123.6, 123.5, 122.0, 120.1, 119.6, 119.5, 109.3, 108.2, 108.0, 99.5, 99.0, 79.4, 78.1, 72.3, 71.5, 33.7, 32.6, 13.0.; Anal Calcd for  $\text{C}_{34}\text{H}_{25}\text{N}_5$ : Calcd: C, 81.09; H, 5.00; N, 13.91. Found: C, 80.88; H, 5.06; N, 13.83.

**4-(5,11-Di(prop-2-yn-1-yl)-5,11-dihydroindolo[3,2-*b*]carbazol-6-yl)-3-methyl-1-(*p*-tolyl)-1*H*-pyrazol-5-amine (3g):**

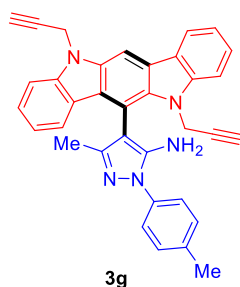

Purification by flash column chromatography on silica gel eluting with petroleum ether–ethyl acetate mixture (90:10 to 85:15, v/v) afforded the title compound as pale yellow solid; mp: 260–262 °C; yield: 0.219 g, 85%; IR (neat): 3396.3, 2834.2, 1723.8, 1618.8, 1527.2, 1453.3, 1349.2, 1186.4, 1117.9.  $\text{cm}^{-1}$ ;  $^1\text{H}$  NMR (400 MHz,  $\text{CDCl}_3$ )  $\delta$  8.27 (d,  $J = 7.7$  Hz, 1H), 8.19 (s, 1H), 7.67 (d,  $J = 8.2$  Hz, 2H), 7.58–7.47 (m, 5H), 7.38–7.26 (m, 3H), 7.17–7.10 (m, 1H), 5.22 (d,  $J = 2.2$  Hz, 2H), 5.13 (dd,  $J = 18.3, 2.2$  Hz, 1H), 5.06 (dd,  $J = 18.3, 2.2$  Hz, 1H), 3.67 (s, 2H), 2.46 (s, 3H), 2.34 (t,  $J = 2.2$  Hz, 1H), 2.16 (s, 3H), 2.10 (t,  $J = 2.1$  Hz, 1H);  $^{13}\text{C}$  NMR (101 MHz,  $\text{CDCl}_3$ )  $\delta$  148.9, 143.6, 142.4, 141.1, 137.3, 136.4, 135.8, 134.6, 130.2, 126.4, 125.9, 124.4, 123.9, 123.7, 123.6, 123.5, 122.0, 120.2, 119.6, 119.4, 109.3, 108.1, 99.2, 98.9, 79.4, 78.1, 77.3, 72.2, 71.5, 33.7, 32.6, 21.2, 13.0.; Anal Calcd for  $\text{C}_{35}\text{H}_{27}\text{N}_5$ : Calcd: C, 81.21; H, 5.26; N, 13.53. Found: C, 80.94; H, 5.18; N, 13.56.

**1-(3-Chlorophenyl)-4-(5,11-di(prop-2-yn-1-yl)-5,11-dihydroindolo[3,2-*b*]carbazol-6-yl)-3-methyl-1*H*-pyrazol-5-amine (3h):**

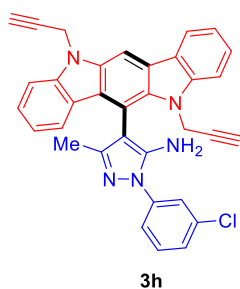

Purification by flash column chromatography on silica gel eluting with petroleum ether–ethyl acetate mixture (90:10 to 85:15, v/v) afforded the title compound as off-white solid; mp: 228–230 °C; yield: 0.185 g, 69%; IR (neat): 3380.1, 2923.2, 1730.5, 1633.5, 1585.3, 1512.3, 1452.7, 1318.5, 1175.8, 1033.7.  $\text{cm}^{-1}$ ;  $^1\text{H}$  NMR (400 MHz,  $\text{CDCl}_3$ )  $\delta$  8.28 (d,  $J = 7.7$  Hz, 1H), 8.20 (s, 1H), 7.92 (s, 1H), 7.75 (d,  $J = 8.0$  Hz, 1H), 7.60–7.43 (m, 6H), 7.39–7.33 (m, 2H), 7.14 (dt,  $J = 8.0, 2.3$  Hz, 1H), 5.21 (d,  $J = 2.2$  Hz, 2H), 5.09 (dd,  $J = 18.3, 2.2$  Hz, 1H), 5.02 (dd,  $J = 18.3, 2.2$  Hz, 1H), 3.70 (s, 2H), 2.34 (s, 1H), 2.16 (s, 3H), 2.10 (s, 1H);  $^{13}\text{C}$  NMR (101 MHz,  $\text{CDCl}_3$ )  $\delta$  149.9, 143.7, 142.5, 141.1, 140.2, 135.8, 135.3, 134.6, 130.6, 127.1, 126.5, 125.9, 124.5, 123.6, 123.5, 123.4, 121.9, 121.1, 120.2, 119.7, 119.5, 109.3, 108.3, 107.5, 100.3, 99.2, 79.4, 78.1, 77.3, 72.4, 71.6, 33.8, 32.6, 13.0.; Anal Calcd for  $\text{C}_{34}\text{H}_{24}\text{ClN}_5$ : Calcd: C, 75.90; H, 4.50; N, 13.02. Found: C, 75.62; H, 4.58; N, 12.97.

**1-(2-Bromophenyl)-4-(5,11-di(prop-2-yn-1-yl)-5,11-dihydroindolo[3,2-*b*]carbazol-6-yl)-3-methyl-1*H*-pyrazol-5-amine (3i):**

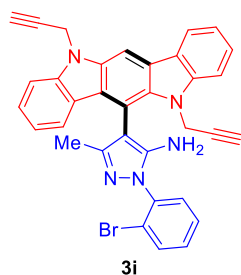

Purification by flash column chromatography on silica gel eluting with petroleum ether–ethyl acetate mixture (90:10 to 85:15, v/v) afforded the title compound as off-white solid; mp: 190-192 °C; yield: 0.195 g, 67%; IR (neat): 3470.1, 2913.2, 2817.2, 1729.1, 1592.3, 1511.1, 1432.2, 1218.5, 1175.4, 1013.7.  $\text{cm}^{-1}$ ;  $^1\text{H}$  NMR (400 MHz,  $\text{CDCl}_3$ )  $\delta$  8.28 (d,  $J = 7.7$  Hz, 1H), 8.19 (s, 1H), 7.82 (dd,  $J = 8.0, 1.0$  Hz, 1H), 7.72 (d,  $J = 7.5$  Hz, 1H), 7.61-7.47 (m, 6H), 7.41 (dt,  $J = 7.8, 1.5$  Hz, 1H), 7.36-7.32 (m, 1H), 7.16-7.12 (m, 1H), 5.26-5.13 (m, 4H), 3.53 (s, 2H), 2.34 (t,  $J = 2.3$  Hz, 1H), 2.16 (s, 3H), 2.11 (t,  $J = 2.2$  Hz, 1H);  $^{13}\text{C}$  NMR (101 MHz,  $\text{CDCl}_3$ )  $\delta$  149.7, 144.5, 142.4, 141.1, 137.6, 135.8, 134.6, 133.7, 131.0, 130.7, 128.7, 126.3, 125.9, 124.4, 123.7, 123.6, 123.5, 122.5, 120.2, 119.6, 119.3, 109.3, 108.2, 107.9, 99.0, 98.8, 79.5, 78.1, 77.3, 72.3, 71.7, 33.7, 32.6, 13.1; Anal Calcd for  $\text{C}_{34}\text{H}_{24}\text{BrN}_5$ : Calcd: C, 70.11; H, 4.15; N, 12.02. Found: C, 69.88; H, 4.11; N, 11.95.

**4-(5,11-Di(prop-2-yn-1-yl)-5,11-dihydroindolo[3,2-*b*]carbazol-6-yl)-3-methyl-1-(3-nitrophenyl)-1*H*-pyrazol-5-amine (3j):**

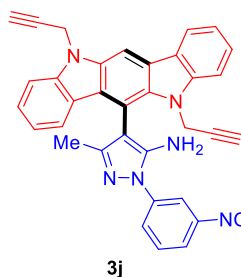

Purification by flash column chromatography on silica gel eluting with petroleum ether–ethyl acetate mixture (90:10 to 85:15, v/v) afforded the title compound as off-white solid; mp: 192-194 °C; yield: 0.194 g, 71%; IR (neat): 3482.2, 2870.6, 1739.6, 1567.7, 1520.8, 1455.9, 1274.7, 1177.8, 1026.9  $\text{cm}^{-1}$ ;  $^1\text{H}$  NMR (400 MHz,  $\text{CDCl}_3$ )  $\delta$  8.81 (s, 1H), 8.28 (d,  $J = 7.7$  Hz, 2H), 8.24-8.2180 (m, 2H), 7.74 (t,  $J = 8.1$  Hz, 1H), 7.62-7.47 (m, 4H), 7.43 (d,  $J = 7.9$  Hz, 1H), 7.36 (t,  $J = 7.3$  Hz, 1H), 7.15-7.120 (m, 1H), 5.23 (d,  $J = 2.0$  Hz, 2H), 5.08 (dd,  $J = 18.3, 2.0$  Hz, 1H), 5.00 (dd,  $J = 18.3, 2.0$  Hz, 1H), 3.72 (s, 2H), 2.35 (s, 1H), 2.18 (s, 3H), 2.16 (s, 1H);  $^{13}\text{C}$  NMR (101 MHz,  $\text{CDCl}_3$ )  $\delta$  150.7, 148.9, 143.8, 142.5, 141.1, 140.4, 135.8, 134.6, 130.5, 128.4, 126.6, 126.0, 124.5, 123.5, 123.4, 121.7, 121.2, 120.2, 119.8, 119.5, 117.5, 109.3, 108.3, 107.0, 101.8, 99.4, 79.4, 78.0, 77.2, 72.4, 71.7, 33.9, 32.6, 13.1; Anal Calcd for  $\text{C}_{34}\text{H}_{24}\text{N}_6\text{O}_2$ : Calcd: C, 74.44; H, 4.41; N, 15.32. Found: C, 74.17; H, 4.38; N, 15.36.

**4-(5,11-Diallyl-5,11-dihydroindolo[3,2-*b*]carbazol-6-yl)-3-methyl-1-phenyl-1*H*-pyrazol-5-amine (3k):**

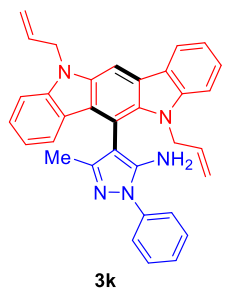

Purification by flash column chromatography on silica gel eluting with petroleum ether–ethyl acetate mixture (90:10 to 85:15, v/v) afforded the title compound as off-white solid; mp: 108-110 °C; yield: 0.162 g, 64%; IR (neat): 3442.2, 2760.6, 1728.3, 1512.3, 1452.7, 1321.5, 1293.8, 1191.3, 1078.9.  $\text{cm}^{-1}$ ;  $^1\text{H}$  NMR (400 MHz,  $\text{CDCl}_3$ )  $\delta$  8.26 (d,  $J = 7.5$  Hz, 1H), 8.11 (s, 1H), 7.80 (d,  $J = 7.6$  Hz, 2H), 7.58 (t,  $J = 7.5$  Hz, 2H), 7.55-7.36 (m, 6H), 7.34-7.30 (m, 1H), 7.09 (t,  $J = 7.0$  Hz, 1H), 6.19-6.12 (m, 1H), 5.96-5.78 (m, 1H), 5.29-5.24 (m, 2H), 5.09 (s, 2H), 5.03-5.00 (m, 3H), 4.78 (d,  $J = 18.0$  Hz, 1H), 3.64 (s, 2H), 2.13 (s, 3H);  $^{13}\text{C}$  NMR (101 MHz,  $\text{CDCl}_3$ )  $\delta$  149.3, 143.4, 142.7, 141.7, 139.0, 136.1, 134.9, 133.6, 132.6, 129.6, 127.2, 126.1, 125.6, 124.0, 123.6, 123.4, 123.3, 122.9, 121.8, 119.9, 118.8, 116.9, 115.6, 109.1, 108.2, 107.4, 100.4, 98.8, 77.3, 46.4, 45.6, 13.0; Anal Calcd for  $\text{C}_{34}\text{H}_{29}\text{N}_5$ : Calcd: C, 80.45; H, 5.76; N, 13.80. Found: C, 80.36; H, 5.71; N, 13.74.

#### 4-(5,11-Diallyl-5,11-dihydroindolo[3,2-*b*]carbazol-6-yl)-3-methyl-1-(*p*-tolyl)-1*H*-pyrazol-5-amine (3l):

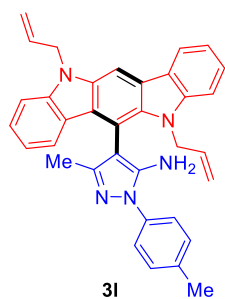

Purification by flash column chromatography on silica gel eluting with petroleum ether–ethyl acetate mixture (90:10 to 85:15, v/v) afforded the title compound as pale yellow solid; mp: 136-138 °C; yield: 0.175 g, 67%; IR (neat): 3442.2, 2770.6, 1763.8, 165.3, 1513.3, 1453.7, 1319.5, 1185.3, 1025.9 cm<sup>-1</sup>; <sup>1</sup>H NMR (400 MHz, CDCl<sub>3</sub>) δ 8.26 (d, *J* = 7.7 Hz, 1H), 8.10 (s, 1H), 7.65 (d, *J* = 8.2 Hz, 2H), 7.51 (t, *J* = 7.5 Hz, 1H), 7.48-7.35 (m, 6H), 7.30 (d, *J* = 7.6 Hz, 1H), 7.08 (t, *J* = 7.3 Hz, 1H), 6.19-6.10 (m, 1H), 5.96-5.78 (m, 1H), 5.28-5.26 (m, 2H), 5.09 (d, *J* = 7.1 Hz, 2H), 5.06-4.89 (m, 3H), 4.78 (d, *J* = 18.0 Hz, 1H), 3.59 (s, 2H), 2.47 (s, 3H), 2.11 (s, 3H); <sup>13</sup>C NMR (101 MHz, CDCl<sub>3</sub>) δ 149.0, 143.3, 142.7, 141.7, 137.2, 136.5, 136.1, 134.9, 133.6, 132.6, 130.2, 126.1, 125.6, 123.9, 123.7, 123.4, 123.3, 122.9, 121.9, 119.9, 118.7, 116.9, 115.6, 109.1, 108.2, 107.5, 100.0, 98.7, 77.2, 46.4, 45.6, 21.2, 13.0; Anal Calcd for C<sub>35</sub>H<sub>31</sub>N<sub>5</sub>: Calcd: C, 80.58; H, 5.99; N, 13.43. Found: C, 80.34; H, 6.02; N, 13.39.

#### 1-(3-Chlorophenyl)-4-(5,11-diallyl-5,11-dihydroindolo[3,2-*b*]carbazol-6-yl)-3-methyl-1*H*-pyrazol-5-amine (3m):

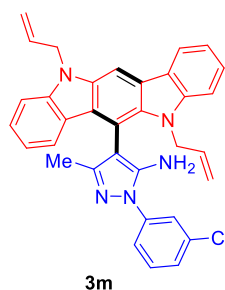

Purification by flash column chromatography on silica gel eluting with petroleum ether–ethyl acetate mixture (90:10 to 85:15, v/v) afforded the title compound as off-white solid; mp: 108-110 °C; yield: 0.187 g, 69%; IR (neat): 3342.2, 2460.6, 1763.4, 1645.9, 1518.3, 1457.7, 1329.5, 1193.3, 1067.8 cm<sup>-1</sup>; <sup>1</sup>H NMR (400 MHz, CDCl<sub>3</sub>) δ 8.26 (d, *J* = 7.6 Hz, 1H), 8.11 (s, 1H), 7.89 (t, *J* = 2.0 Hz, 1H), 7.72 (dd, *J* = 8.1, 1.0 Hz, 1H), 7.50 (d, *J* = 8.1 Hz, 2H), 7.48-7.36 (m, 6H), 7.31 (d, *J* = 7.6 Hz, 1H), 7.11-7.06 (m, 1H), 6.19-6.10 (m, 1H), 5.93-5.78 (m, 1H), 5.28-5.20 (m, 2H), 5.12-5.08 (m, 2H), 5.04-4.99 (m, 1H), 4.98-4.87 (m, 2H), 3.64 (s, 2H), 2.11 (s, 3H); <sup>13</sup>C NMR (101 MHz, CDCl<sub>3</sub>): <sup>13</sup>C NMR (101 MHz, CDCl<sub>3</sub>) δ 150.0, 143.4, 142.7, 141.7, 140.2, 136.1, 135.4, 134.8, 133.5, 132.5, 130.6, 127.0, 126.2, 125.7, 124.0, 123.3, 123.3, 123.2, 122.9, 121.7, 120.9, 120.0, 118.8, 116.9, 115.6, 109.1, 108.3, 106.8, 101.1, 98.9, 77.2, 46.4, 45.6, 13.0; Anal Calcd for C<sub>34</sub>H<sub>28</sub>ClN<sub>5</sub>: Calcd: C, 75.33; H, 5.21; N, 12.92. Found: C, 75.09; H, 5.15; N, 12.99.

#### 1-(2-Bromophenyl)-4-(5,11-diallyl-5,11-dihydroindolo[3,2-*b*]carbazol-6-yl)-3-methyl-1*H*-pyrazol-5-amine (3n):

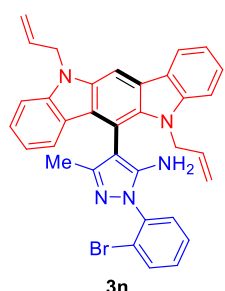

Purification by flash column chromatography on silica gel eluting with petroleum ether–ethyl acetate mixture (90:10 to 85:15, v/v) afforded the title compound as off-white solid; mp: 75-77 °C; yield: 0.225 g, 77%; IR (neat): 3332.2, 2740.6, 1763.7, 1645.5, 1516.3, 1459.7, 1323.5, 1265.7, 1181.3. cm<sup>-1</sup>; <sup>1</sup>H NMR (400 MHz, CDCl<sub>3</sub>) δ 8.25 (d, *J* = 7.7 Hz, 1H), 8.10 (s, 1H), 7.82 (d, *J* = 7.9 Hz, 1H), 7.66 (d, *J* = 7.1 Hz, 1H), 7.57-7.52 (m, 2H), 7.44-7.38 (m, 3H), 7.10 (t, *J* = 7.2 Hz, 1H), 6.19-6.10 (m, 1H), 5.94-5.86 (m, 1H), 5.28-5.21 (m, 2H), 5.09-5.08 (m, 2H), 5.04-5.01 (m, 2H), 4.82 (d, *J* = 17.2 Hz, 1H), 3.78-3.60 (m, 4H), 3.48 (s, 2H), 2.10 (s, 3H); <sup>13</sup>C NMR (101 MHz, CDCl<sub>3</sub>) δ 149.7, 144.3, 142.7, 141.7, 137.7, 136.1, 133.8, 133.7, 132.6, 130.9, 130.8, 130.6, 128.7, 126.0, 125.6, 123.9, 123.5, 123.3, 122.9, 122.2, 119.9, 118.7, 118.6, 116.9, 115.6, 109.2, 108.1, 107.3, 98.8, 77.2, 70.5, 46.3, 45.6, 13.1; Anal Calcd for C<sub>34</sub>H<sub>28</sub>BrN<sub>5</sub>: Calcd: C, 69.62; H, 4.81; N, 11.94. Found: C, 69.35; H, 4.72; N, 11.91.



#### 4-(5,11-Diallyl-5,11-dihydroindolo[3,2-*b*]carbazol-6-yl)-3-methyl-1-(3-nitrophenyl)-1*H*-pyrazol-5-amine (3o):

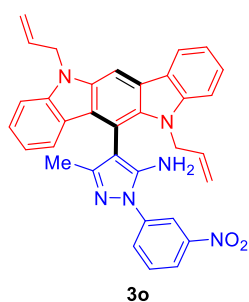

Purification by flash column chromatography on silica gel eluting with petroleum ether–ethyl acetate mixture (90:10 to 85:15, v/v) afforded the title compound as yellow solid; mp: 108-110 °C; yield: 0.245 g, 89%; IR (neat): 3399.3, 3324.8, 2767.8, 1723.4, 1610.2, 1528.1, 1238.9, 1185.3, 1080.9.  $\text{cm}^{-1}$ ;  $^1\text{H}$  NMR (400 MHz,  $\text{CDCl}_3$ )  $\delta$  8.78 (t,  $J = 2.0$  Hz, 1H), 8.26 (d,  $J = 7.8$  Hz, 2H), 8.23 (dd,  $J = 8.2, 1.4$  Hz, 1H), 8.13 (s, 1H), 7.74 (t,  $J = 8.2$  Hz, 1H), 7.52 (t,  $J = 7.3$  Hz, 1H), 7.48-7.53 (m, 2H), 7.41-7.35 (m, 2H), 7.32 (d,  $J = 7.5$  Hz, 1H), 7.08 (dt,  $J = 7.8, 1.5$  Hz, 1H), 6.20-6.10 (m, 1H), 5.91-5.79 (m, 1H), 5.33-5.21 (m, 2H), 5.10 (d,  $J = 6.9$  Hz, 2H), 5.06-5.01 (m, 1H), 5.01-4.86 (m, 2H), 4.76 (dd,  $J = 17.2, 1.0$  Hz, 1H), 3.64 (s, 2H), 2.14 (s, 3H);  $^{13}\text{C}$  NMR (101 MHz,  $\text{CDCl}_3$ )  $\delta$  150.8, 149.0, 143.2, 142.7, 141.7, 140.4, 136.1, 134.8, 133.5, 132.5, 130.5, 128.1, 126.3, 125.7, 124.1, 123.2, 123.1, 122.9, 121.5, 121.0, 120.0, 118.9, 118.8, 117.3, 117.0, 115.6, 109.1, 108.3, 106.3, 102.5, 99.2, 46.4, 45.6, 13.1; Anal Calcd for  $\text{C}_{34}\text{H}_{28}\text{N}_6\text{O}_2$ : Calcd: C, 73.90; H, 5.11; N, 15.21. Found: C, 72.82; H, 5.13; N, 15.09.

#### 4-(5,11-Dibenzyl-5,11-dihydroindolo[3,2-*b*]carbazol-6-yl)-3-methyl-1-phenyl-1*H*-pyrazol-5-amine (3p):

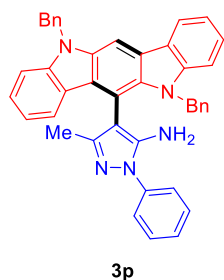

Purification by flash column chromatography on silica gel eluting with petroleum ether–ethyl acetate mixture (90:10 to 85:15, v/v) afforded the title compound as off-white solid; mp: 92-94 °C; yield: 0.209 g, 69%; IR (neat): 3026.6, 2922.2, 2789.8, 1765.7, 1595.3, 1505.8, 1453.7, 1276.9, 1185.4.  $\text{cm}^{-1}$ ;  $^1\text{H}$  NMR (400 MHz,  $\text{CDCl}_3$ )  $\delta$  8.25 (d,  $J = 7.7$  Hz, 1H), 8.14 (s, 1H), 7.67 (d,  $J = 7.7$  Hz, 2H), 7.55 (t,  $J = 7.9$  Hz, 2H), 7.49 (d,  $J = 7.2$  Hz, 1H), 7.43-7.35 (m, 6H), 7.34-7.30 (m, 5H), 7.07-7.01 (m, 4H), 6.74 (d,  $J = 7.0$  Hz, 2H), 5.70 (s, 2H), 5.58 (s, 2H), 2.92 (s, 2H), 1.99 (s, 3H);  $^{13}\text{C}$  NMR (101 MHz,  $\text{CDCl}_3$ )  $\delta$  149.4, 143.7, 143.2, 142.0, 138.9, 137.5, 136.5, 134.6, 129.5, 128.9, 128.4, 127.5, 126.9, 126.8, 126.5, 126.4, 125.8, 125.4, 124.1, 123.6, 123.3, 123.2, 122.6, 121.9, 120.1, 119.0, 118.9, 108.7, 108.3, 107.5, 100.4, 98.9, 77.3, 47.4, 46.9, 12.8; Anal Calcd for  $\text{C}_{42}\text{H}_{33}\text{N}_5$ : Calcd: C, 83.00; H, 5.47; N, 11.52. Found: C, 82.91; H, 5.45; N, 11.59.

#### 4-(5,11-Dibenzyl-5,11-dihydroindolo[3,2-*b*]carbazol-6-yl)-3-methyl-1-(*p*-tolyl)-1*H*-pyrazol-5-amine (3q):

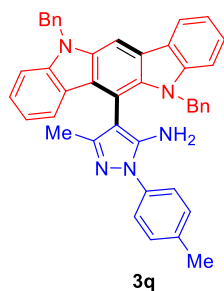

Purification by flash column chromatography on silica gel eluting with petroleum ether–ethyl acetate mixture (90:10 to 85:15, v/v) afforded the title compound as off-white solid; mp: 70-72 °C; yield: 0.226 g, 73%; IR (neat): 2922.2, 2755.1, 1610.2, 1575.8, 1513.3, 1453.7, 1319.5, 1117.8, 1051.1.  $\text{cm}^{-1}$ ;  $^1\text{H}$  NMR (400 MHz,  $\text{CDCl}_3$ )  $\delta$  8.25 (d,  $J = 7.7$  Hz, 1H), 8.13 (s, 1H), 7.53 (d,  $J = 8.1$  Hz, 2H), 7.49 (d,  $J = 7.5$  Hz, 1H), 7.42-7.32 (m, 4H), 7.37-7.30 (m, 8H), 7.06 (t,  $J = 7.3$  Hz, 4H), 6.73 (d,  $J = 7.0$  Hz, 2H), 5.69 (s, 2H), 5.58 (s, 2H), 2.91 (s, 2H), 2.47 (s, 3H), 1.97 (s, 3H);  $^{13}\text{C}$  NMR (101 MHz,  $\text{CDCl}_3$ )  $\delta$  149.0, 143.6, 143.1, 143.0, 138.8, 137.5, 136.9, 136.5, 136.3, 134.6, 130.0, 128.9, 128.4, 127.5, 126.8, 126.5, 126.3, 125.7, 125.4, 124.0, 123.6, 123.4, 123.3, 122.6, 121.9, 120.1, 118.9, 108.7, 108.2, 107.7, 100.0, 98.8, 77.3, 47.3, 46.8, 21.2, 12.7; Anal Calcd for  $\text{C}_{43}\text{H}_{35}\text{N}_5$ : Calcd: C, 83.06; H, 5.67; N, 11.26. Found: C, 82.89; H, 5.61; N, 11.21.

**1-(3-Chlorophenyl)-4-(5,11-dibenzyl-5,11-dihydroindolo[3,2-*b*]carbazol-6-yl)-3-methyl-1*H*-pyrazol-5-amine (3r):**

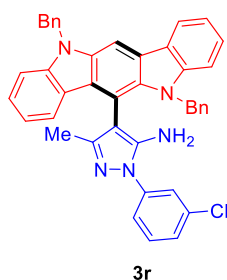

3r

Purification by flash column chromatography on silica gel eluting with petroleum ether–ethyl acetate mixture (90:10 to 85:15, v/v) afforded the title compound as off-white solid; mp: 102-104 °C; yield: 0.215 g, 67%; IR (neat): 2921.2, 1612.2, 1589.6, 1512.3, 1452.7, 1319.4, 1118.2, 1051.3.  $\text{cm}^{-1}$ ;  $^1\text{H}$  NMR (400 MHz,  $\text{CDCl}_3$ )  $\delta$  8.25 (d,  $J = 7.7$  Hz, 1H), 8.14 (s, 1H), 7.71 (s, 1H), 7.58 (d,  $J = 8.0$  Hz, 1H), 7.53-7.45 (m, 2H), 7.43-7.39 (m, 3H), 7.39-7.30 (m, 8H), 7.09-7.02 (m, 4H), 6.74 (d,  $J = 7.2$  Hz, 2H), 5.70 (s, 2H), 5.60-5.49 (m, 2H), 2.86 (s, 2H), 2.01 (s, 3H);  $^{13}\text{C}$  NMR (101 MHz,  $\text{CDCl}_3$ )  $\delta$  150.0, 143.7, 143.2, 142.0, 140.1, 138.8, 137.4, 136.5, 135.1,

134.6, 130.4, 128.9, 128.5, 127.5, 126.9, 126.7, 126.5, 126.4, 125.8, 125.3, 124.1, 123.6, 123.2, 123.0, 122.6, 121.8, 120.7, 120.1, 119.0, 108.7, 108.3, 107.0, 101.2, 99.1, 77.2, 47.5, 46.9, 12.8; Anal Calcd for  $\text{C}_{42}\text{H}_{32}\text{ClN}_5$ : Calcd: C, 78.55; H, 5.02; N, 10.91 Found: C, 78.41; H, 4.92; N, 10.88.

**4-(2,8-Dichloro-5,11-dihydroindolo[3,2-*b*]carbazol-6-yl)-3-methyl-1-phenyl-1*H*-pyrazol-5-amine (3s):**

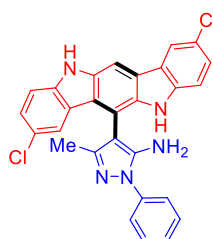

3s

Purification by flash column chromatography on silica gel eluting with petroleum ether–ethyl acetate mixture (90:10 to 85:15, v/v) afforded the title compound as pale yellow solid; mp: 186-188 °C; yield: 0.188 g, 76%; IR (neat): 3398.1, 1765.6, 1575.3, 1527.3, 1468.3, 1271.2, 1128.9, 1023.4.  $\text{cm}^{-1}$ ;  $^1\text{H}$  NMR (400 MHz, DMSO)  $\delta$  11.39 (s, 1H), 10.85 (s, 1H), 8.37 (s, 1H), 8.24 (s, 1H), 7.83 (d,  $J = 7.7$  Hz, 2H), 7.58 (t,  $J = 7.6$  Hz, 2H), 7.48-7.50 (m, 3H), 7.38 (t,  $J = 7.4$  Hz, 3H), 4.98 (s, 2H), 1.96 (s, 3H);  $^{13}\text{C}$  NMR (101 MHz, DMSO)  $\delta$  147.8, 145.3, 140.3, 140.2, 140.0, 136.6, 136.2, 129.7, 126.5, 125.7, 125.3, 124.5, 124.3, 123.2, 122.5, 122.4, 122.1, 121.8, 121.3,

120.4, 112.8, 112.0, 108.5, 100.9, 98.2, 13.4; Anal Calcd for  $\text{C}_{28}\text{H}_{19}\text{Cl}_2\text{N}_5$ : Calcd: C, 67.75; H, 3.86; N, 14.11. Found: C, 67.48; H, 4.82; N, 14.20.

**4-(2,8-Dichloro-5,11-dihydroindolo[3,2-*b*]carbazol-6-yl)-3-methyl-1-(*p*-tolyl)-1*H*-pyrazol-5-amine (3t):**

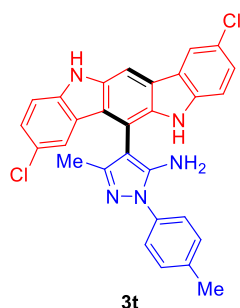

3t

Purification by flash column chromatography on silica gel eluting with petroleum ether–ethyl acetate mixture (90:10 to 85:15, v/v) afforded the title compound as pale yellow; mp: above 360 °C; yield: 0.199 g, 78%; IR (neat): 3399.3, 1587.8, 1520.8, 1453.3, 1387.4, 1282.2, 1023.5.  $\text{cm}^{-1}$ ;  $^1\text{H}$  NMR (400 MHz, DMSO)  $\delta$  11.42 (s, 1H), 10.87 (s, 1H), 8.37 (s, 1H), 8.24 (s, 1H), 7.68 (d,  $J = 8.2$  Hz, 2H), 7.49 (dd,  $J = 8.2, 2.7$  Hz, 3H), 7.38-7.36 (m, 4H), 4.95 (s, 2H), 2.40 (s, 3H), 1.95 (s, 3H);  $^{13}\text{C}$  NMR (101 MHz, DMSO)  $\delta$  147.4, 145.2, 140.3, 140.2, 137.5, 136.5, 136.1, 135.9, 130.1, 125.7, 125.3, 124.5, 124.3, 123.2, 122.5, 122.3, 122.0, 121.7, 121.4, 120.4, 112.8, 112.0, 108.6, 100.8, 97.9, 21.1, 13.4; Anal Calcd for  $\text{C}_{29}\text{H}_{21}\text{Cl}_2\text{N}_5$ : Calcd: C, 68.24; H, 4.15; N, 13.72. Found: C, 67.96; H, 4.13; N, 13.64.

**1-(3-Chlorophenyl)-4-(2,8-dichloro-5,11-dihydroindolo[3,2-*b*]carbazol-6-yl)-3-methyl-1*H*-pyrazol-5-amine (3u):**

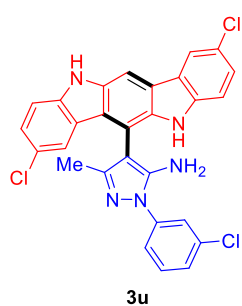

3u

Purification by flash column chromatography on silica gel eluting with petroleum ether–ethyl acetate mixture (90:10 to 85:15, v/v) afforded the title compound as pale yellow solid; mp: 202–204 °C; yield: 0.167 g, 63%; IR (neat): 3399.3, 1587.8, 1520.8, 1453.3, 1367.7, 1282.2, 1023.4  $\text{cm}^{-1}$ ;  $^1\text{H}$  NMR (400 MHz, DMSO)  $\delta$  11.44 (s, 1H), 10.88 (s, 1H), 8.38 (d,  $J$  = 1.8 Hz, 1H), 8.26 (s, 1H), 7.91 (t,  $J$  = 1.8 Hz, 1H), 7.84 (d,  $J$  = 7.8 Hz, 1H), 7.59 (t,  $J$  = 8.1 Hz, 1H), 7.53–7.46 (m, 3H), 7.45–7.35 (m, 3H), 5.22 (s, 2H), 1.95 (s, 3H);  $^{13}\text{C}$  NMR (101 MHz, DMSO)  $\delta$  148.7, 145.8, 141.4, 140.3, 140.2, 136.5, 136.1, 133.9, 131.4, 126.1, 125.8, 125.4, 124.5, 124.2, 122.5, 122.4, 122.3, 121.7, 121.3, 121.2, 121.1, 120.5, 112.7, 112.1,

108.1, 101.0, 98.7, 14.5; Anal Calcd for  $\text{C}_{28}\text{H}_{18}\text{Cl}_3\text{N}_5$ : Calcd: C, 63.35; H, 3.42; N, 13.19. Found: C, 63.03; H, 3.38; N, 13.26.

**4-(2,8-Dichloro-5,11-dihydroindolo[3,2-*b*]carbazol-6-yl)-3-methyl-1-(3-nitrophenyl)-1*H*-pyrazol-5-amine (3v):**

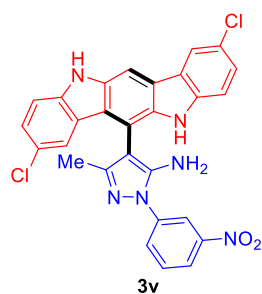

3v

Purification by flash column chromatography on silica gel eluting with petroleum ether–ethyl acetate mixture (90:10 to 85:15, v/v) afforded the title compound as yellow solid; mp: >360 °C; yield: 0.192 g, 71%; IR (neat): 3399.3, 3324.8, 1617.7, 1528.2, 1453.7, 1349.3, 1245.5, 1067.7.  $\text{cm}^{-1}$ ;  $^1\text{H}$  NMR (400 MHz, DMSO)  $\delta$  11.38 (s, 1H), 10.84 (s, 1H), 8.64 (t,  $J$  = 2.2 Hz, 1H), 8.33 (d,  $J$  = 2.1 Hz, 1H), 8.32 (dd,  $J$  = 8.1, 2.0, Hz, 1H), 8.21 (s, 1H), 8.15 (dd,  $J$  = 8.3, 2.2, Hz, 1H), 7.81 (t,  $J$  = 8.2 Hz, 1H), 7.45–7.42 (m, 3H), 7.36–7.31 (m, 2H), 5.32 (s, 2H), 1.91 (s, 3H);  $^{13}\text{C}$  NMR (101 MHz, DMSO)  $\delta$  148.7, 145.8, 141.5, 140.4, 140.3, 136.6,

136.2, 134.0, 131.4, 126.1, 125.8, 125.4, 124.6, 124.3, 122.6, 122.5, 122.4, 122.1, 121.8, 121.4, 121.3, 120.5, 112.8, 112.1, 108.2, 101.1, 98.8, 13.5; Anal Calcd for  $\text{C}_{28}\text{H}_{18}\text{Cl}_2\text{N}_6\text{O}_2$ : Calcd: C, 62.12; H, 3.35; N, 15.52. Found: C, 61.92; H, 3.39; N, 15.61.

**4-(2,8-Dimethyl-5,11-dihydroindolo[3,2-*b*]carbazol-6-yl)-3-methyl-1-(*p*-tolyl)-1*H*-pyrazol-5-amine (3w):**

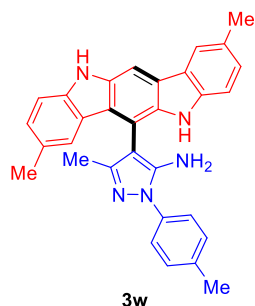

3w

Purification by flash column chromatography on silica gel eluting with petroleum ether–ethyl acetate mixture (90:10 to 85:15, v/v) afforded the title compound as yellow solid; mp: 227–229 °C; yield: 0.221 g, 94%; IR (neat): 3336.2, 2922.4, 1759.0, 1770.1, 1519.2, 1483.3, 1369.2, 1293.4, 1079.8.  $\text{cm}^{-1}$ ;  $^1\text{H}$  NMR (400 MHz, DMSO)  $\delta$  10.98 (s, 1H), 10.45 (s, 1H), 8.03–8.11 (m, 2H), 7.71 (d,  $J$  = 7.1 Hz, 2H), 7.53–7.24 (m, 5H), 7.23–7.02 (m, 2H), 4.86 (s, 2H), 2.51 (s, 3H), 2.41 (s, 3H), 2.36 (s, 3H), 1.97 (s, 3H);  $^{13}\text{C}$  NMR (101 MHz, DMSO)  $\delta$  147.5, 145.2, 140.0, 136.1, 136.0, 135.6, 130.2, 130.1, 127.0, 126.7, 126.6, 126.4, 126.0, 123.5, 123.4,

122.5, 121.9, 121.8, 120.5, 120.4, 111.1, 110.4, 110.3, 100.0, 99.2, 22.0, 21.7, 21.1, 13.4; Anal Calcd for  $\text{C}_{31}\text{H}_{27}\text{N}_5$ : Calcd: C, 79.29; H, 5.80; N, 14.91. Found: C, 78.98; H, 5.83; N, 14.95.

#### 4-(2,8-Dimethyl-5,11-dihydroindolo[3,2-*b*/carbazol-6-yl)-3-methyl-1-(3-nitrophenyl)-1*H*-pyrazol-5-amine (3x):

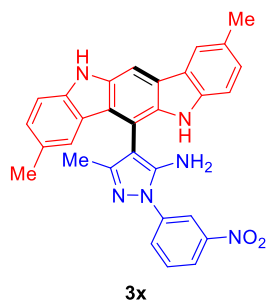

Purification by flash column chromatography on silica gel eluting with petroleum ether–ethyl acetate mixture (90:10 to 85:15, v/v) afforded the title compound as yellow solid; mp: above 360 °C; yield: 0.240 g, 96%; IR (neat): 3397.4, 2896.5, 1759.3, 1770.4, 1535.9, 1482.8, 1385.6, 1294.5, 1246.3.  $\text{cm}^{-1}$ ;  $^1\text{H}$  NMR (400 MHz, DMSO)  $\delta$  10.99 (s, 1H), 10.47 (s, 1H), 8.73 (s, 1H), 8.35 (d,  $J = 7.1$  Hz, 1H), 8.19 (d,  $J = 7.2$  Hz, 1H), 8.05–8.10 (m, 2H), 7.85 (s, 1H), 7.37 (s, 3H), 7.18 (s, 2H), 5.20 (s, 2H), 2.51 (s, 3H), 2.36 (s, 3H), 1.98 (s, 3H);  $^{13}\text{C}$  NMR (101 MHz, DMSO)  $\delta$  149.5, 148.7, 145.9, 141.2, 140.0, 136.1, 135.7, 131.1, 128.6, 127.0, 126.7, 126.5, 126.1, 123.4, 123.3, 122.5, 121.9, 121.8, 120.4, 116.9, 111.1, 110.3, 107.1, 100.2, 100.1, 60.2, 22.0, 21.7, 21.3, 13.5; Anal Calcd for  $\text{C}_{30}\text{H}_{24}\text{N}_6\text{O}_2$ : Calcd: C, 71.99; H, 4.83; N, 16.79. Found: C, 71.73; H, 4.81; N, 16.87.

#### 6. General Procedure for the Synthesis of Compounds 5a and 5b.

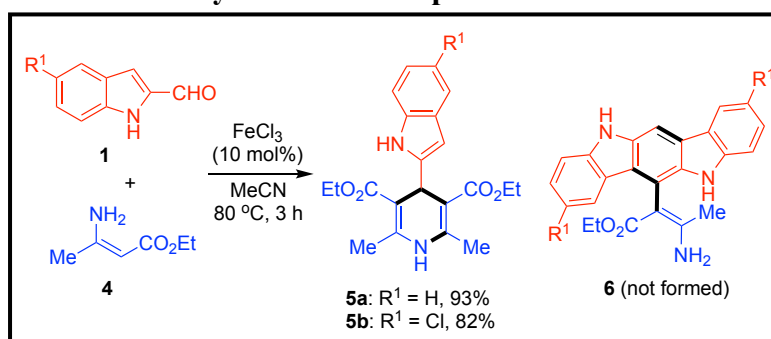

To a stirred solution of compound 1 (1.0 mmol, 1.0 equiv) and ethyl (*Z*)-3-aminobut-2-enoate 4 (2.0 equiv) in MeCN (6 mL) were added and  $\text{FeCl}_3$  (10 mol%). The resulting mixture was stirred at 80 °C for 3 h and after completion of the reaction, as monitored by TLC, the mixture was diluted with water, the aqueous suspension was extracted with DCM (2 x 30 mL), washed with water and brine. The organic layer was dried over anhydrous  $\text{Na}_2\text{SO}_4$  and concentrated under reduced pressure. The crude product was purified by flash column chromatography using petroleum ether-ethyl acetate mixture as eluent (90:10 to 85:15, v/v) to obtain compound 5.

#### Diethyl 4-(1*H*-indol-2-yl)-2,6-dimethyl-1,4-dihydropyridine-3,5-dicarboxylate (5a):

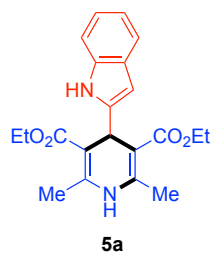

Purification by flash column chromatography on silica gel eluting with petroleum ether–ethyl acetate mixture (90:10 to 85:15, v/v) afforded the title compound as off-white solid; mp: 175–177 °C; yield: 0.342 g, 93%; IR (neat): 3396.7, 3344.6, 2933.1, 1456.3, 1368.5, 1322.3, 1291.5, 1125.5, 1018.4  $\text{cm}^{-1}$ ;  $^1\text{H}$  NMR (400 MHz, DMSO- $d_6$ )  $\delta$  10.18 (s, 1H), 8.94 (s, 1H), 7.35 (t,  $J = 7.3$  Hz, 2H), 6.96 (t,  $J = 7.3$  Hz, 1H), 6.89 (t,  $J = 7.3$  Hz, 1H), 5.96 (s, 1H), 5.13 (s, 1H), 4.08 (q,  $J = 7.0$  Hz, 4H), 2.30 (s, 6H), 1.18 (t,  $J = 6.9$  Hz, 6H);  $^{13}\text{C}$  NMR (101 MHz, DMSO- $d_6$ )  $\delta$  167.5, 146.5, 145.4, 136.3, 128.5, 120.3, 119.6, 118.9, 111.8, 100.2, 97.9, 59.7, 33.2, 18.9, 14.8; Anal Calcd for  $\text{C}_{21}\text{H}_{24}\text{N}_2\text{O}_4$ : Calcd: C, 68.46; H, 6.57; N, 7.60. Found: C, 68.19; H, 6.52; N, 7.55.

**Diethyl 4-(5-chloro-1*H*-indol-2-yl)-2,6-dimethyl-1,4-dihydropyridine-3,5-dicarboxylate (5b):**

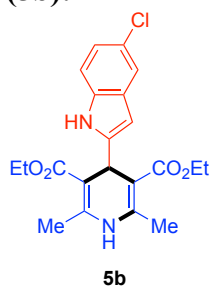

Purification by flash column chromatography on silica gel eluting with petroleum ether–ethyl acetate mixture (90:10 to 85:15, v/v) afforded the title compound as off-white solid; mp: 173-175 °C; yield: 0.330 g, 82%; IR (neat): 3396.7, 3332.1, 2988.0, 1737.9, 1651.2, 1368.5, 1308.7, 1129.3, 1099.4, 1017.5  $\text{cm}^{-1}$ ;  $^1\text{H}$  NMR (400 MHz,  $\text{DMSO-d}_6$ )  $\delta$  10.40 (s, 1H), 8.94 (s, 1H), 7.40 (d,  $J = 1.8$  Hz, 1H), 7.33 (d,  $J = 8.6$  Hz, 1H), 6.95 (dd,  $J = 8.6, 2.0$  Hz, 1H), 5.97 (s, 1H), 5.11 (s, 1H), 4.08 (q,  $J = 7.0$  Hz, 4H), 2.29 (s, 6H), 1.16 (t,  $J = 7.0$  Hz, 6H);  $^{13}\text{C}$  NMR (101 MHz,  $\text{DMSO-d}_6$ )  $\delta$  167.4, 147.3, 146.6, 134.7, 129.7, 123.5, 120.2, 118.8, 113.2, 100.0, 97.8, 59.7, 33.4, 18.9, 14.7; Anal Calcd for  $\text{C}_{21}\text{H}_{23}\text{ClN}_2\text{O}_4$ : Calcd: C, 62.61; H, 5.75; N, 6.95. Found: C, 62.42; H, 5.71; N, 6.84.

## 7. X-Ray crystallography data of compounds **3f**

Compound **3f** was dissolved by heating in minimum amount of acetonitrile and kept undisturbed for two days to obtain the crystals. The mother liquor was removed by filtration and the crystals were taken out carefully using micro spatula for characterization.

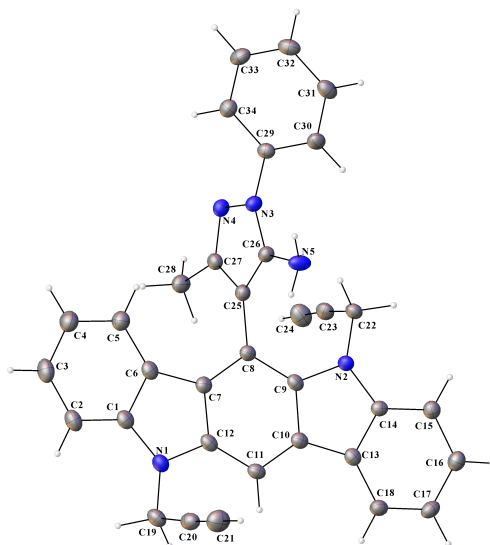

**Figure S1.** ORTEP representation of compound **3f** displaying thermal ellipsoid at 50% probability (CCDC: 2289177).

The crystal was kept at 100.15 K during data collection. Using Olex2 [1], the structure was solved with the olex2.solve [2] structure solution program using Charge Flipping and refined with the olex2.refine [3] refinement package using Gauss-Newton minimization.

1. Dolomanov, O.V., Bourhis, L.J., Gildea, R.J., Howard, J.A.K. & Puschmann, H. (2009), *J. Appl. Cryst.* 42, 339-341.
2. Bourhis, L.J., Dolomanov, O.V., Gildea, R.J., Howard, J.A.K., Puschmann, H. (2015). *Acta Cryst.* A71, 59-75.
3. Bourhis, L.J., Dolomanov, O.V., Gildea, R.J., Howard, J.A.K., Puschmann, H. (2015). *Acta Cryst.* A71, 59-75.

**Table S1. Crystal data and structure refinement for compound **3f**.**

|                      |                                                |                  |
|----------------------|------------------------------------------------|------------------|
| Identification code  | <b>3f</b>                                      |                  |
| Empirical formula    | C <sub>34</sub> H <sub>25</sub> N <sub>5</sub> |                  |
| Formula weight       | 503.59                                         |                  |
| Temperature          | 110.00 K                                       |                  |
| Wavelength           | 1.54178 Å                                      |                  |
| Crystal system       | Monoclinic                                     |                  |
| Space group          | P 1 21 1                                       |                  |
| Unit cell dimensions | a = 7.6326(4) Å                                | α = 90°.         |
|                      | b = 16.0132(9) Å                               | β = 107.461(2)°. |
|                      | c = 10.7244(6) Å                               | γ = 90°.         |
| Volume               | 1250.36(12) Å <sup>3</sup>                     |                  |
| Z                    | 2                                              |                  |

|                                   |                                             |
|-----------------------------------|---------------------------------------------|
| Density (calculated)              | 1.338 Mg/m <sup>3</sup>                     |
| Absorption coefficient            | 0.630 mm <sup>-1</sup>                      |
| F(000)                            | 528                                         |
| Crystal size                      | 0.046 x 0.037 x 0.032 mm <sup>3</sup>       |
| Theta range for data collection   | 4.322 to 70.247°.                           |
| Index ranges                      | -9<=h<=9, -19<=k<=19, -13<=l<=13            |
| Reflections collected             | 4718                                        |
| Independent reflections           | 4718 [R(int) = 0.0924]                      |
| Completeness to theta = 67.679°   | 99.9 %                                      |
| Absorption correction             | Semi-empirical from equivalents             |
| Max. and min. transmission        | 0.753 and 0.623                             |
| Refinement method                 | Full-matrix least-squares on F <sup>2</sup> |
| Data / restraints / parameters    | 4718 / 1 / 355                              |
| Goodness-of-fit on F <sup>2</sup> | 1.076                                       |
| Final R indices [I>2sigma(I)]     | R1 = 0.0420, wR2 = 0.1043                   |
| R indices (all data)              | R1 = 0.0422, wR2 = 0.1045                   |
| Absolute structure parameter      | -0.1(2)                                     |
| Extinction coefficient            | n/a                                         |
| Largest diff. peak and hole       | 0.340 and -0.295 e.Å <sup>-3</sup>          |

## 8. Absorption and Emission Spectra of Compound 3a

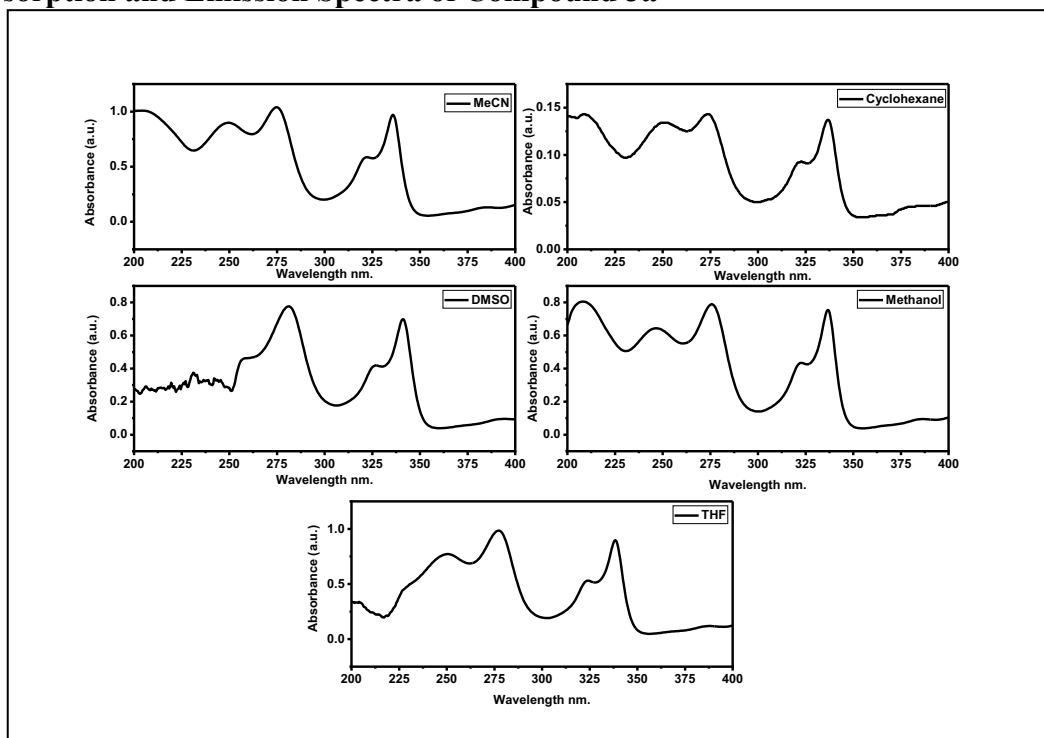

**Figure S2.** Absorption spectra of compound **3a** in different solvents

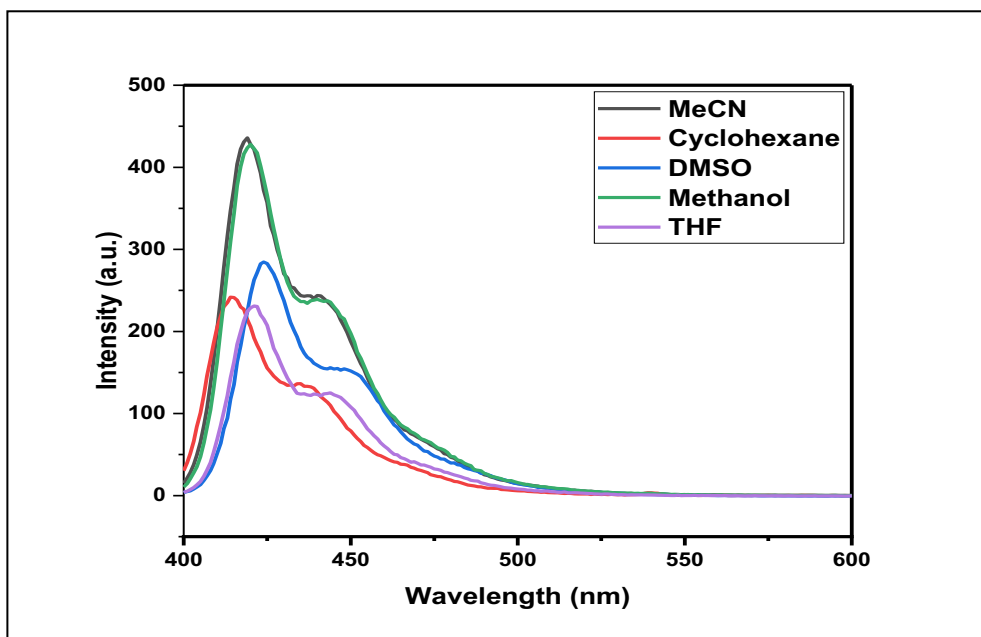

**Figure S3.** Emission spectra of compound **3a** in different solvents (Excitation wavelength 270 nm)



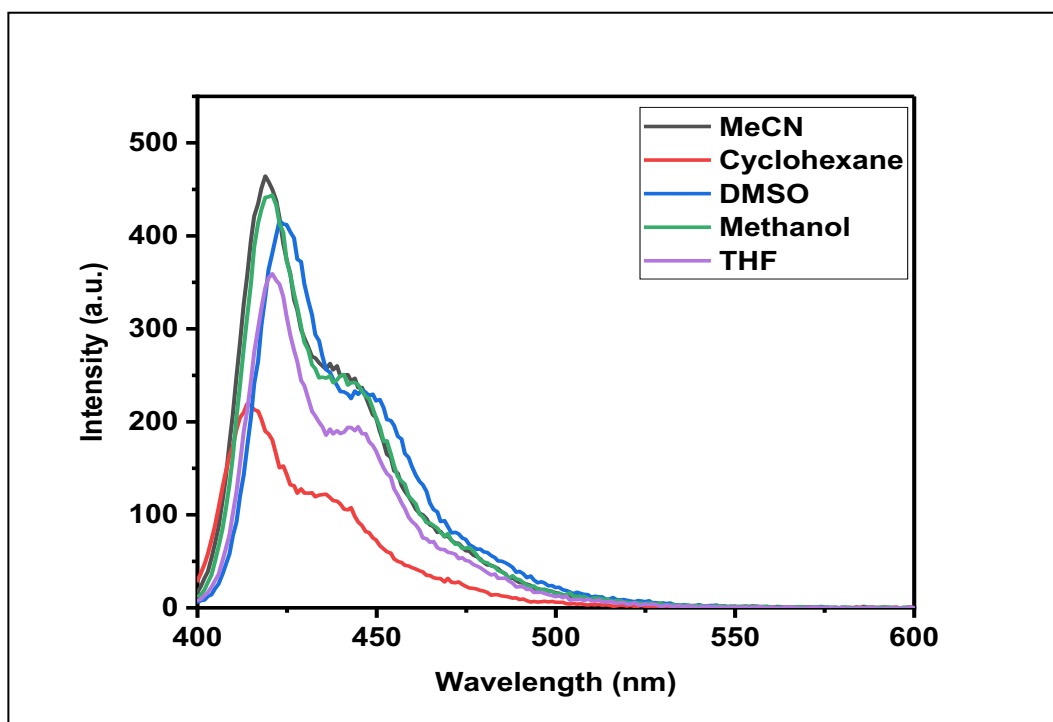

**Figure S4.** Emission spectra of compound **3a** in different solvents (Excitation wavelength 330 nm)

## 9. HPLC Resolution of Compound 3a

Column: Daicel Chiralpak IB column

Solvent System: Hexane: EtOAc (80:20)

Flow Rate: 1 mL/min.

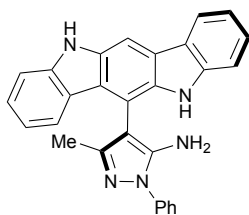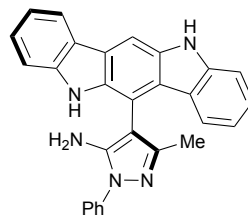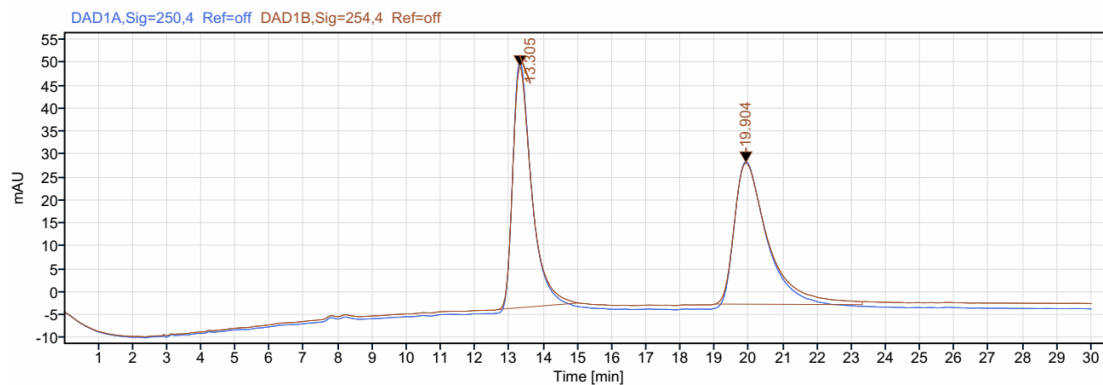

Signal: DAD1B,Sig=254,4 Ref=off

| RT [min] | Width [min] | Area           | Height | Area% |
|----------|-------------|----------------|--------|-------|
| 13.305   | 2.33        | 2030.60        | 52.53  | 48.80 |
| 19.904   | 4.30        | 2130.19        | 30.78  | 51.20 |
|          | <b>Sum</b>  | <b>4160.79</b> |        |       |

## 10. Copies of $^1\text{H}$ and $^{13}\text{C}$ NMR Spectra

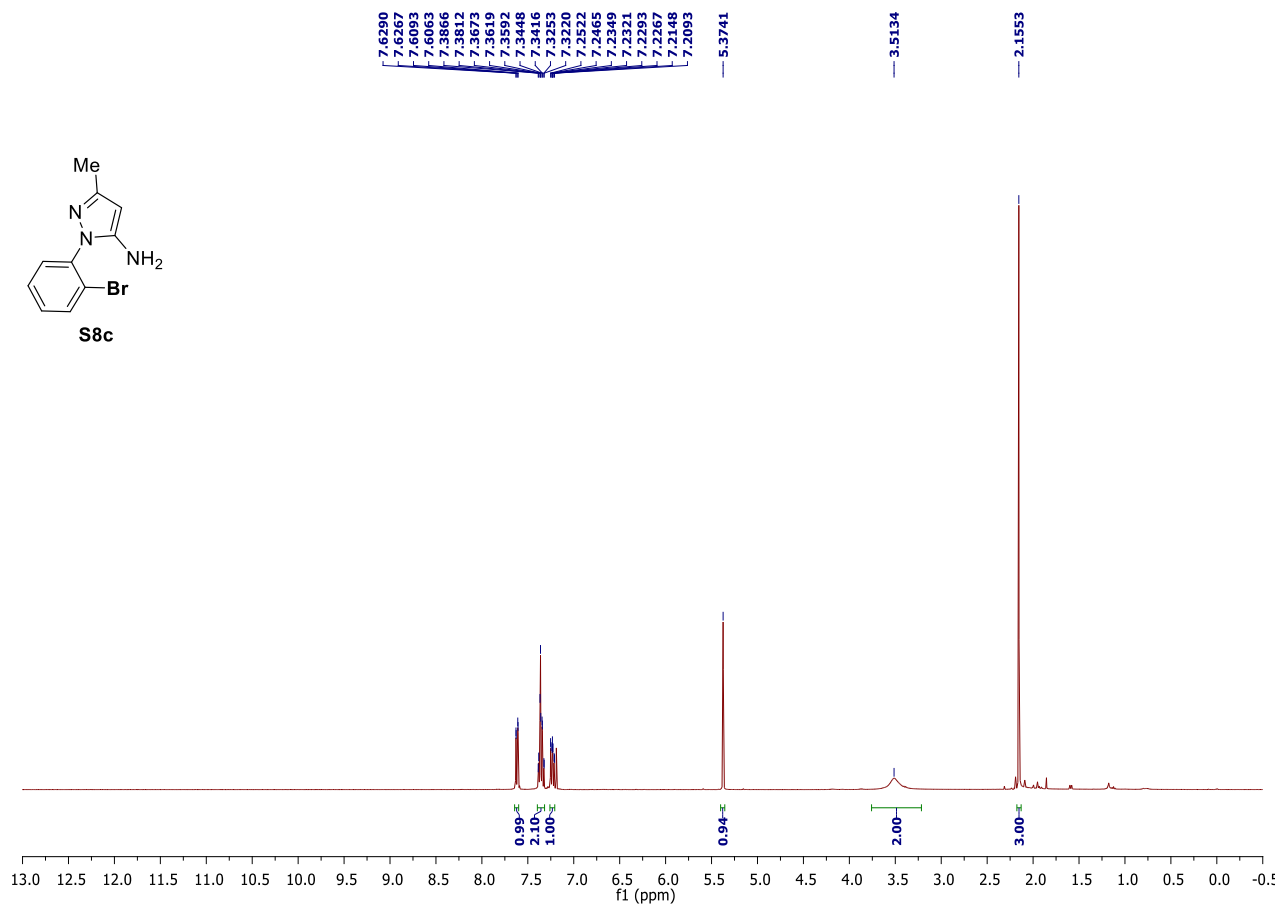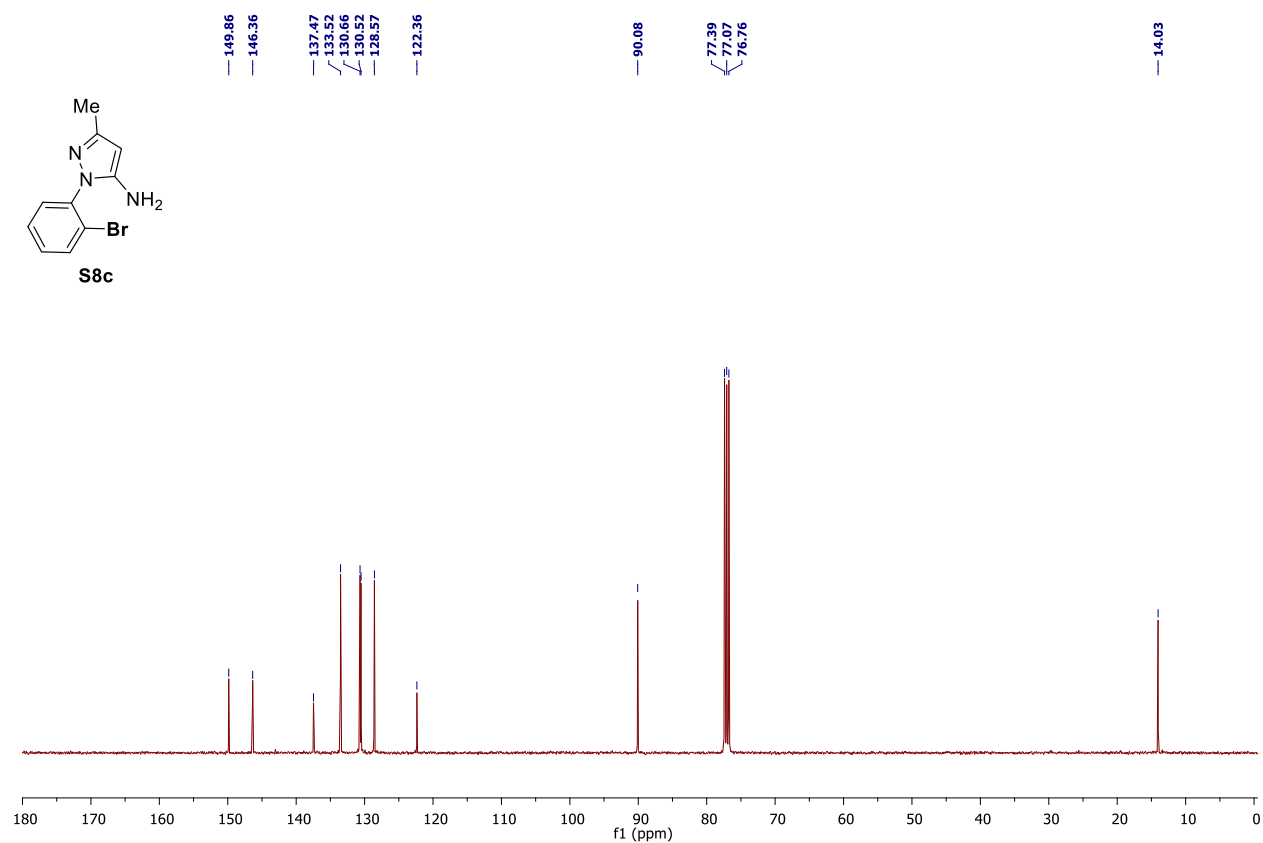

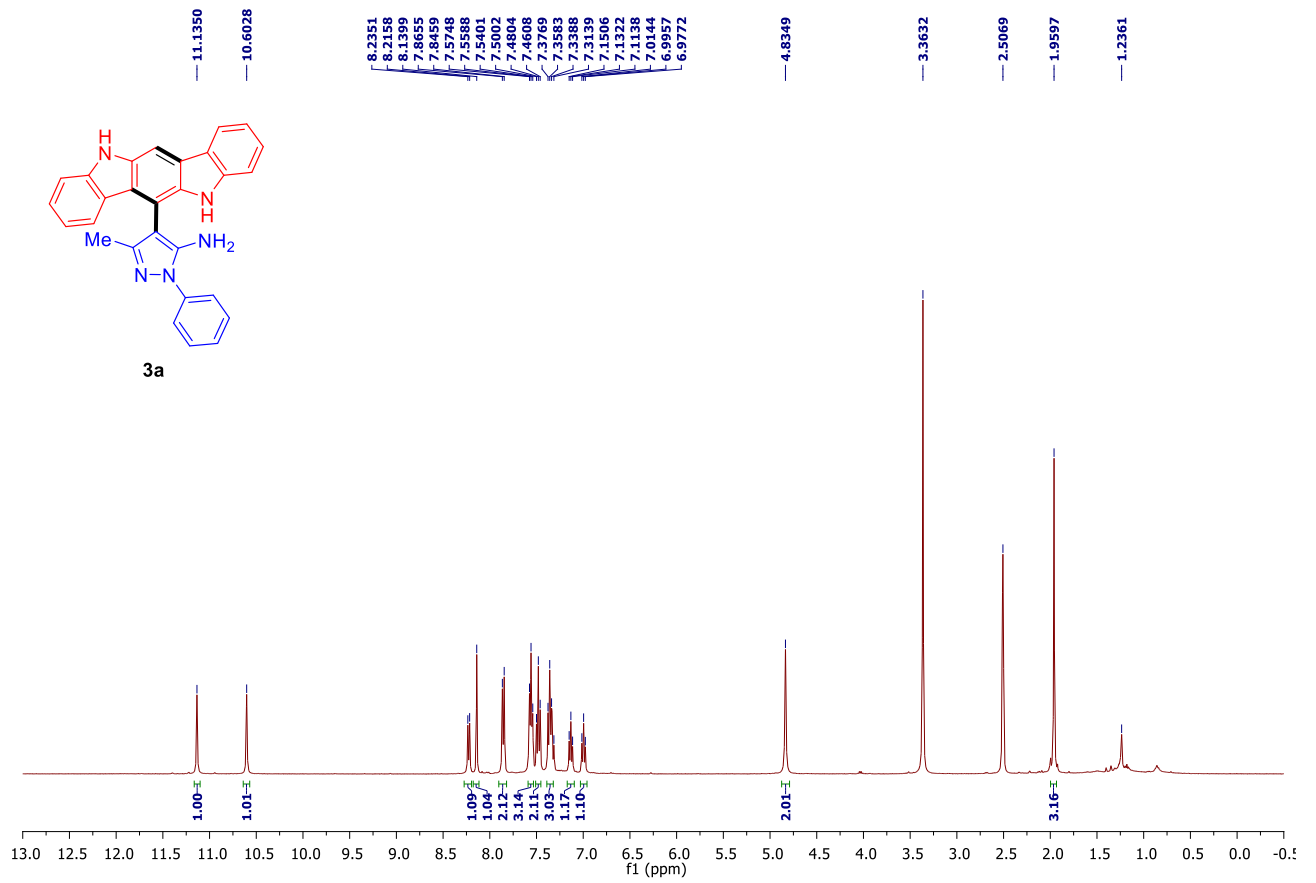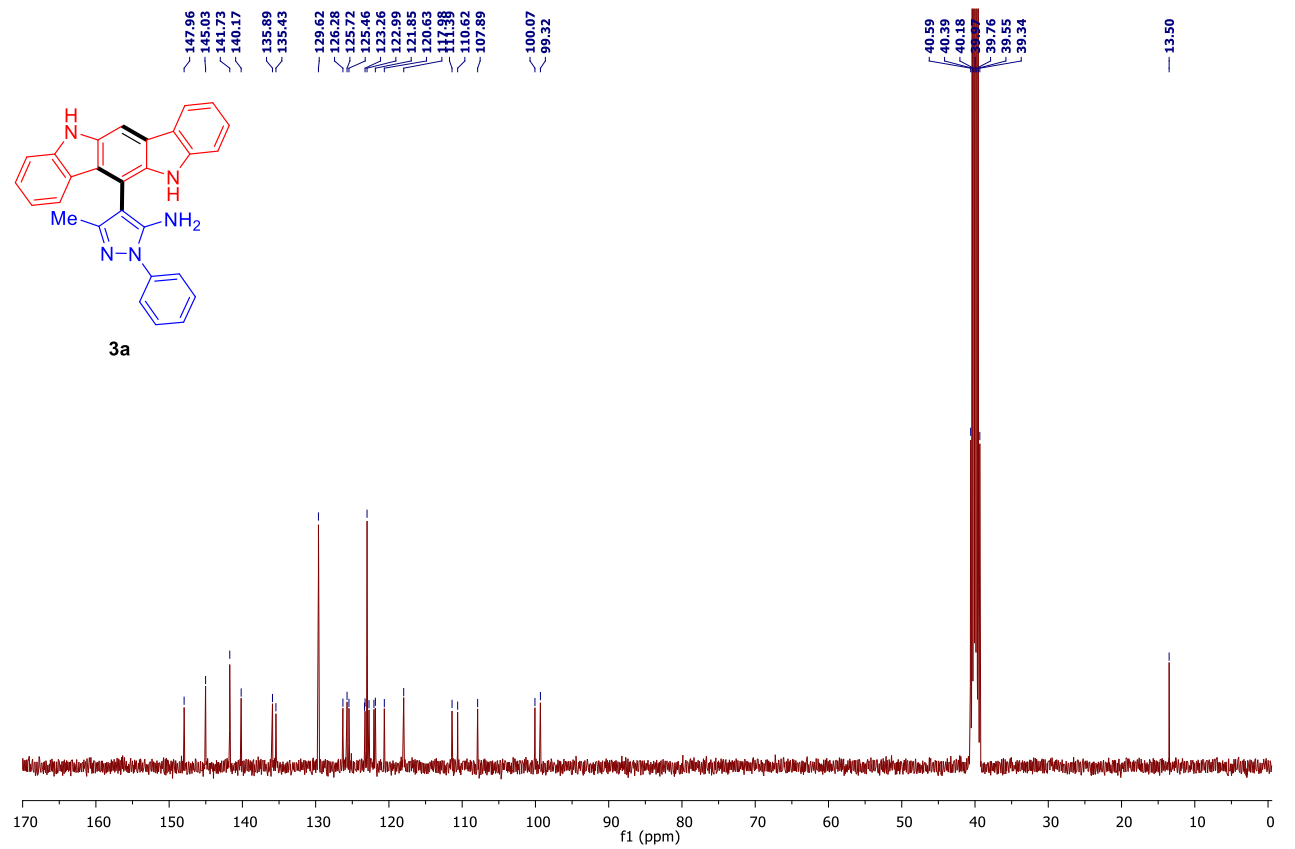

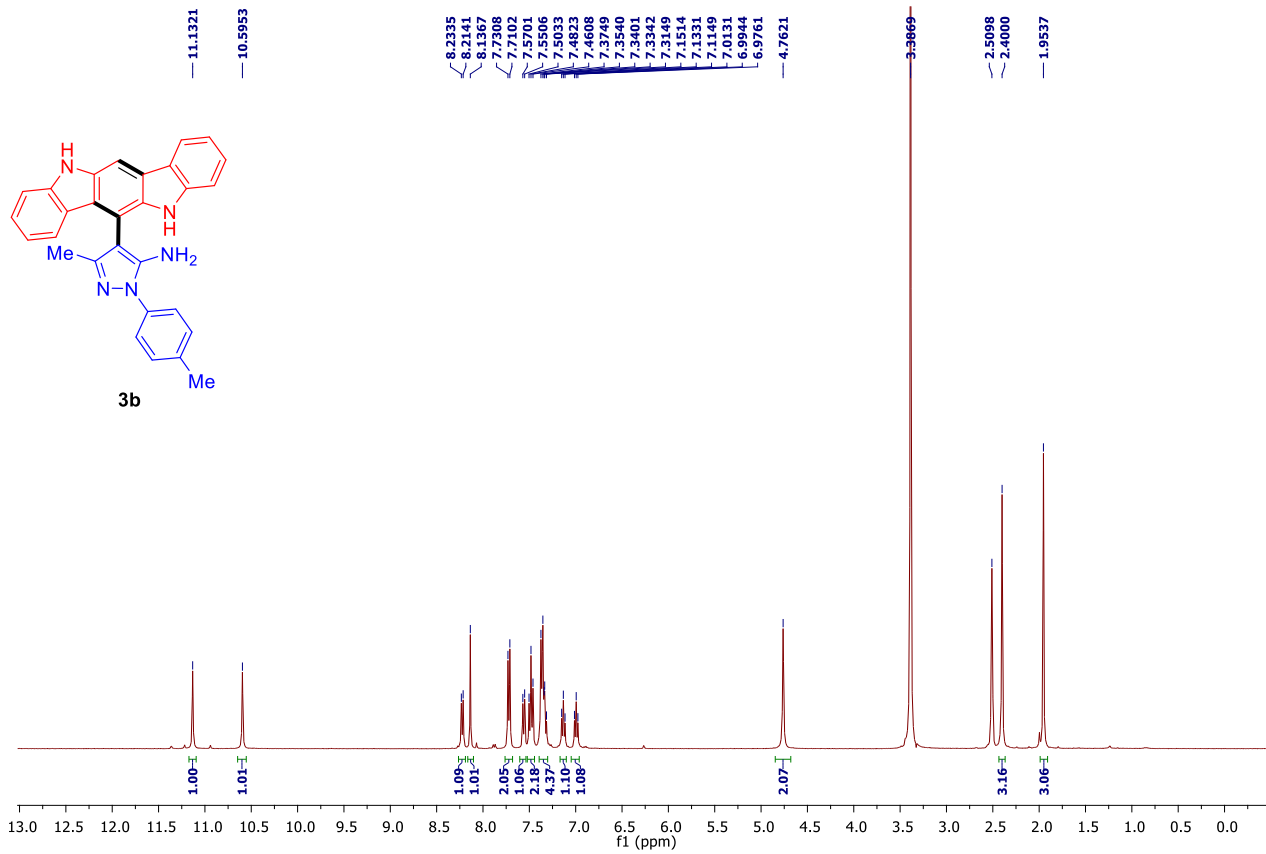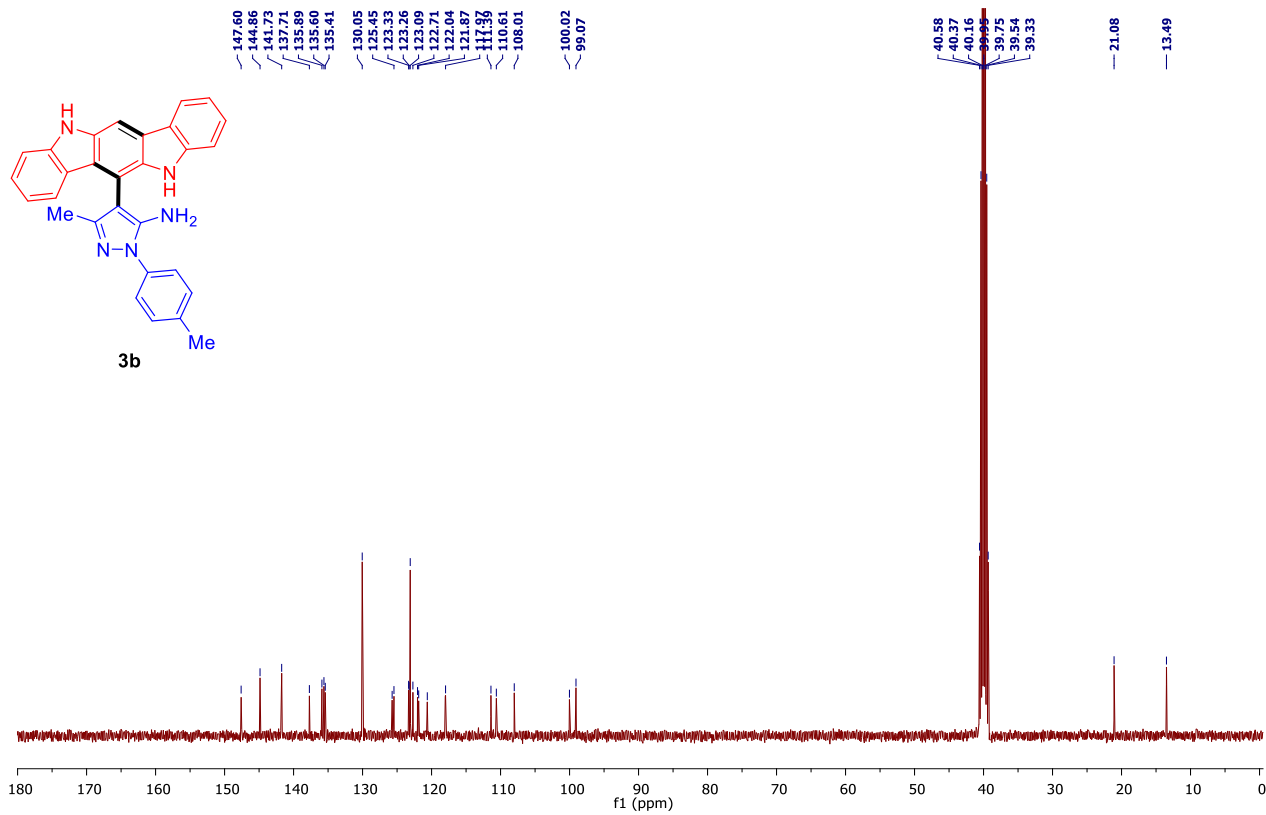

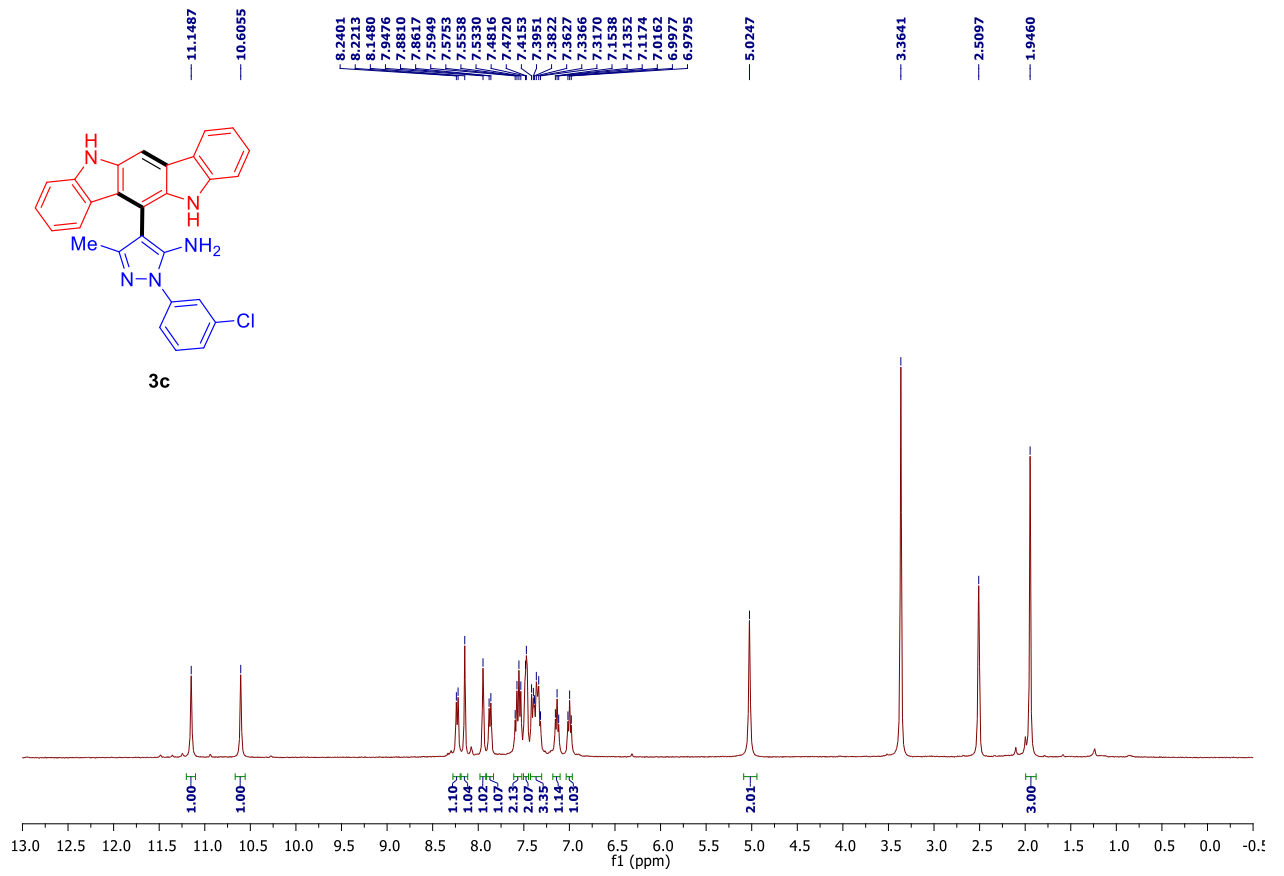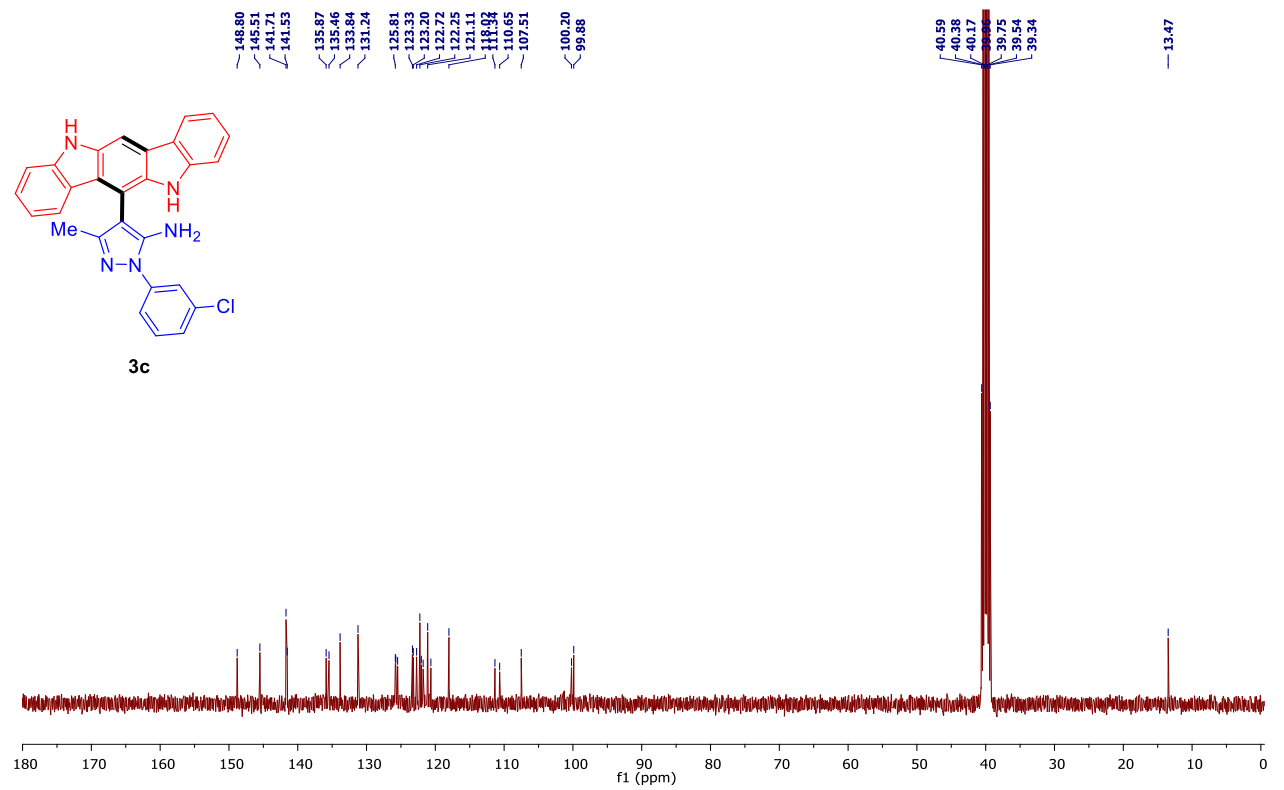

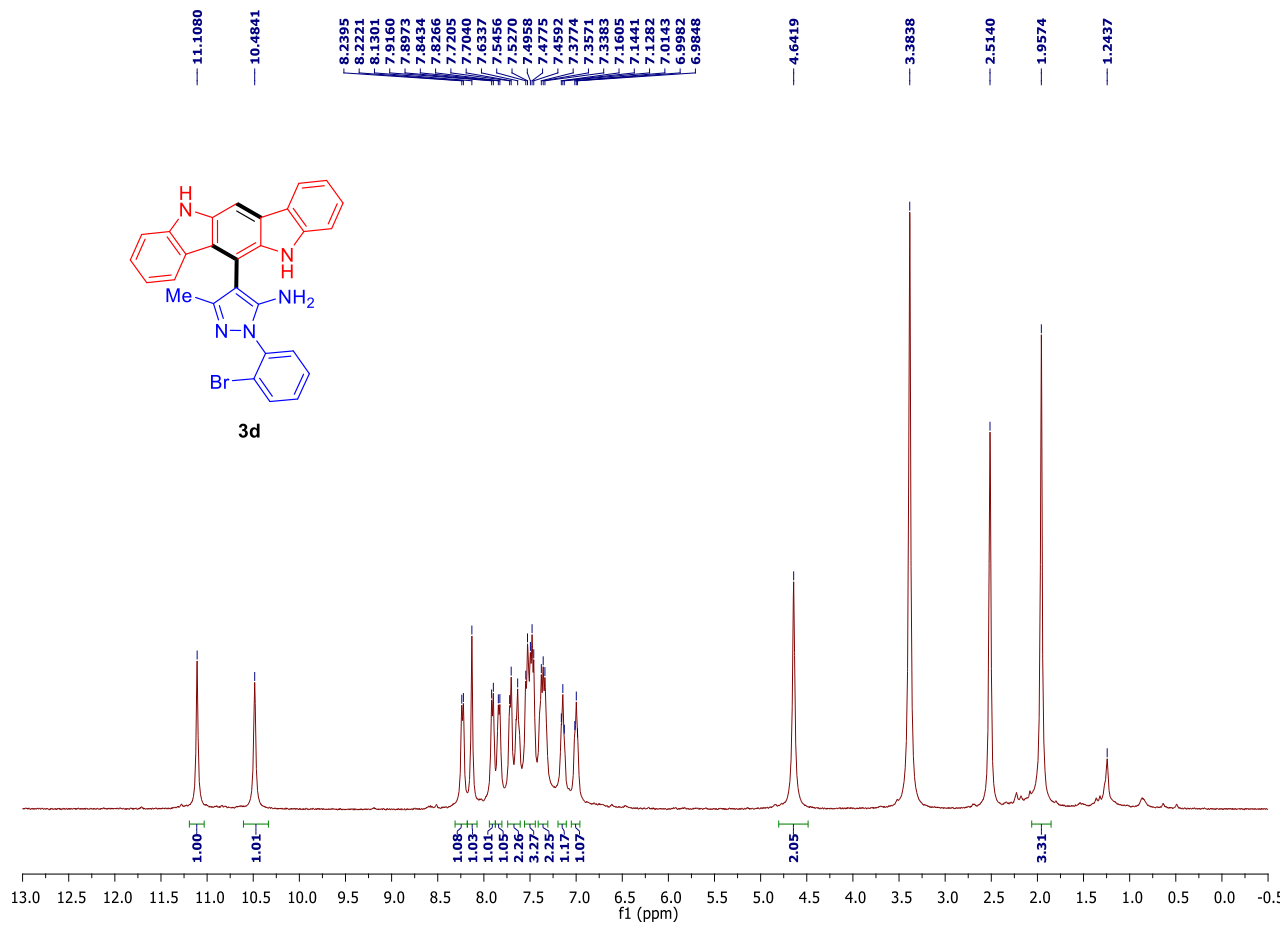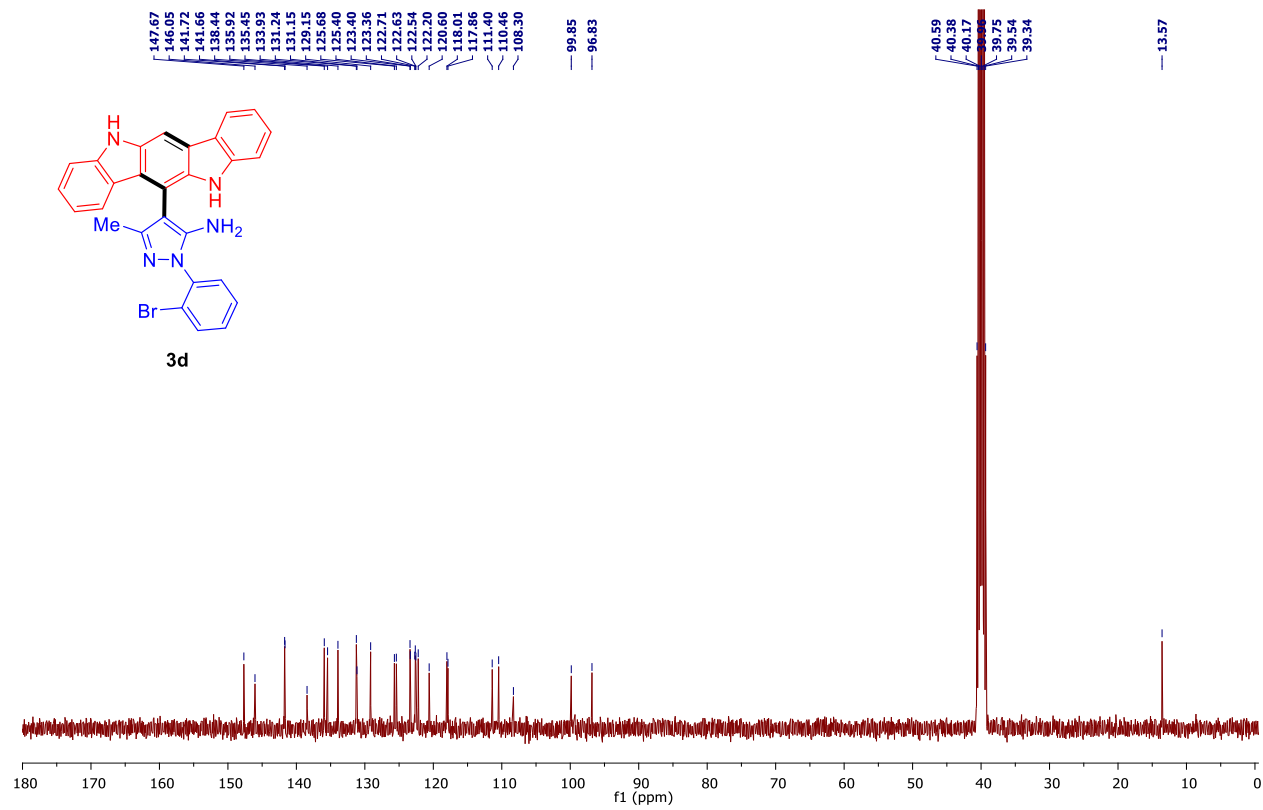

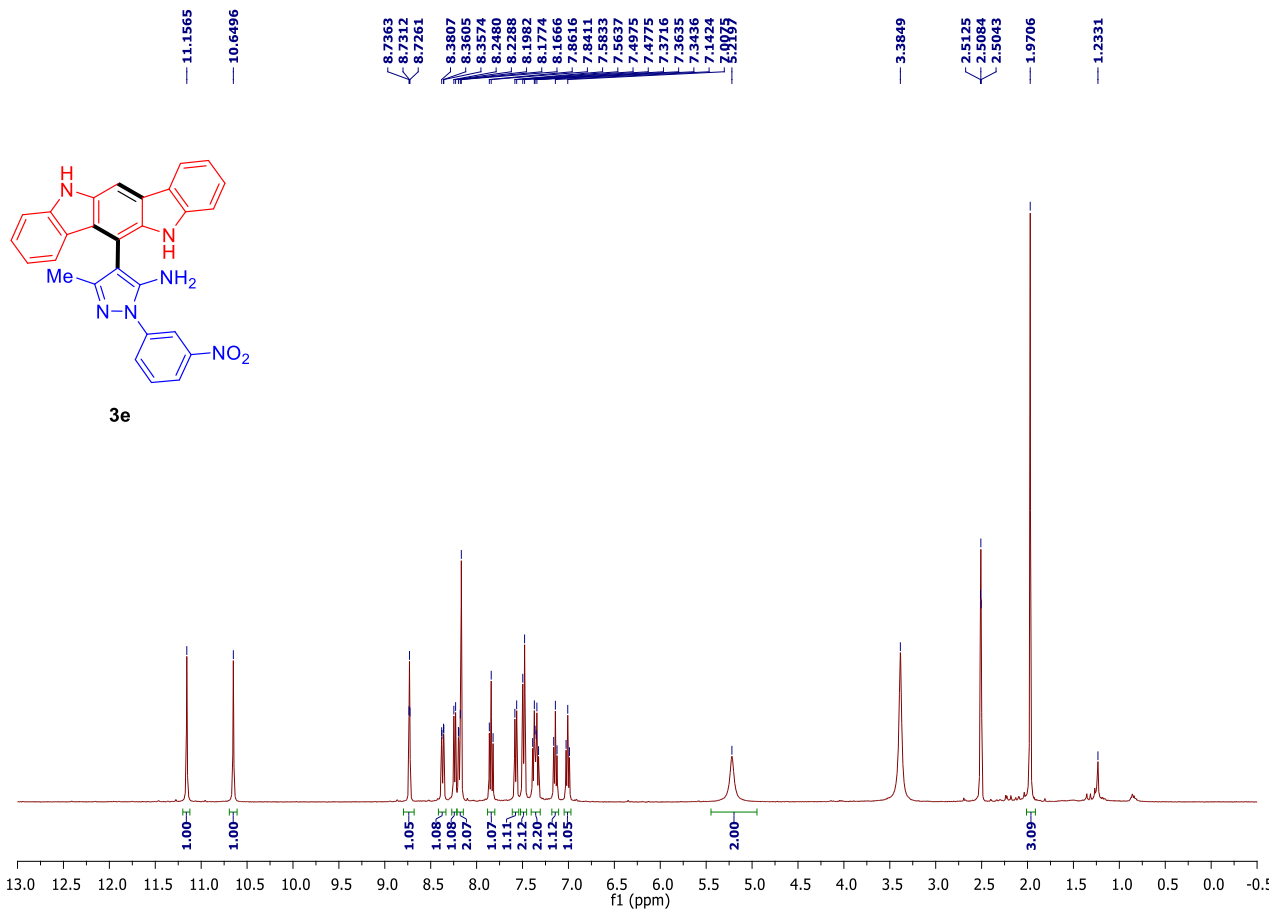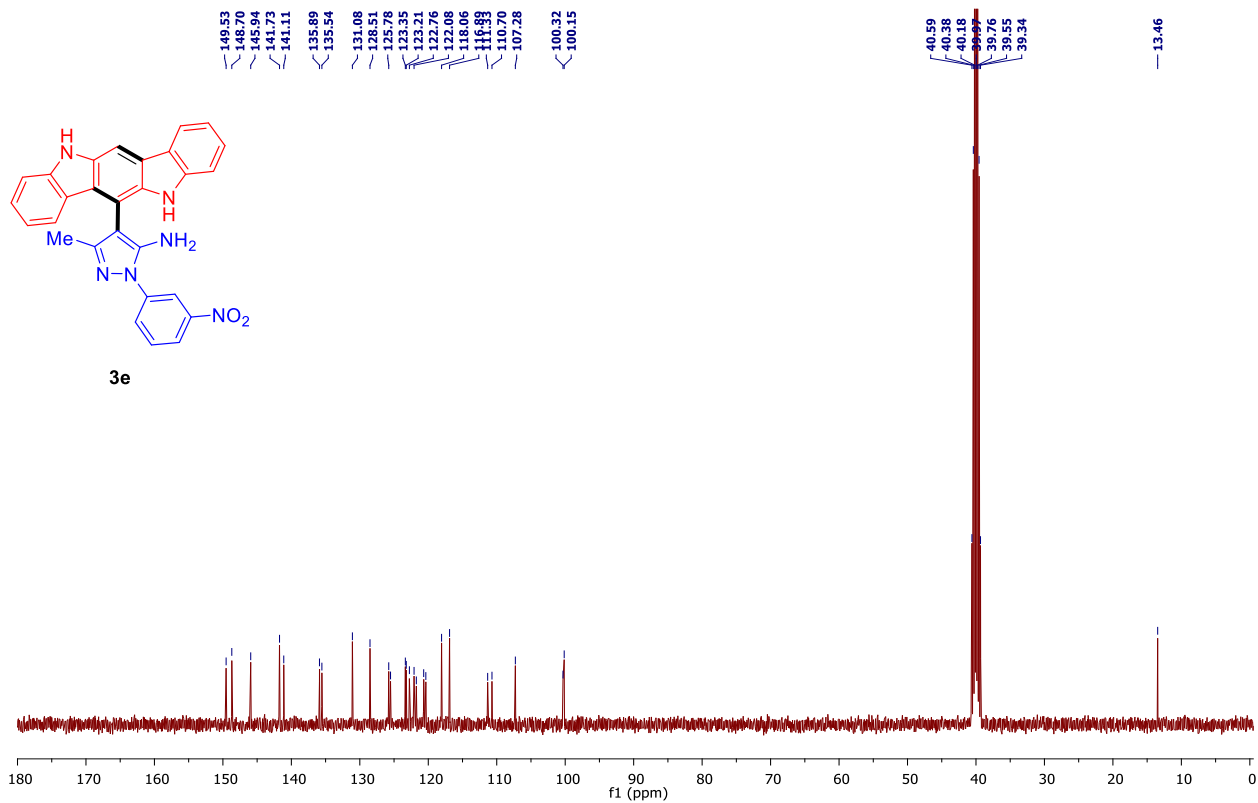



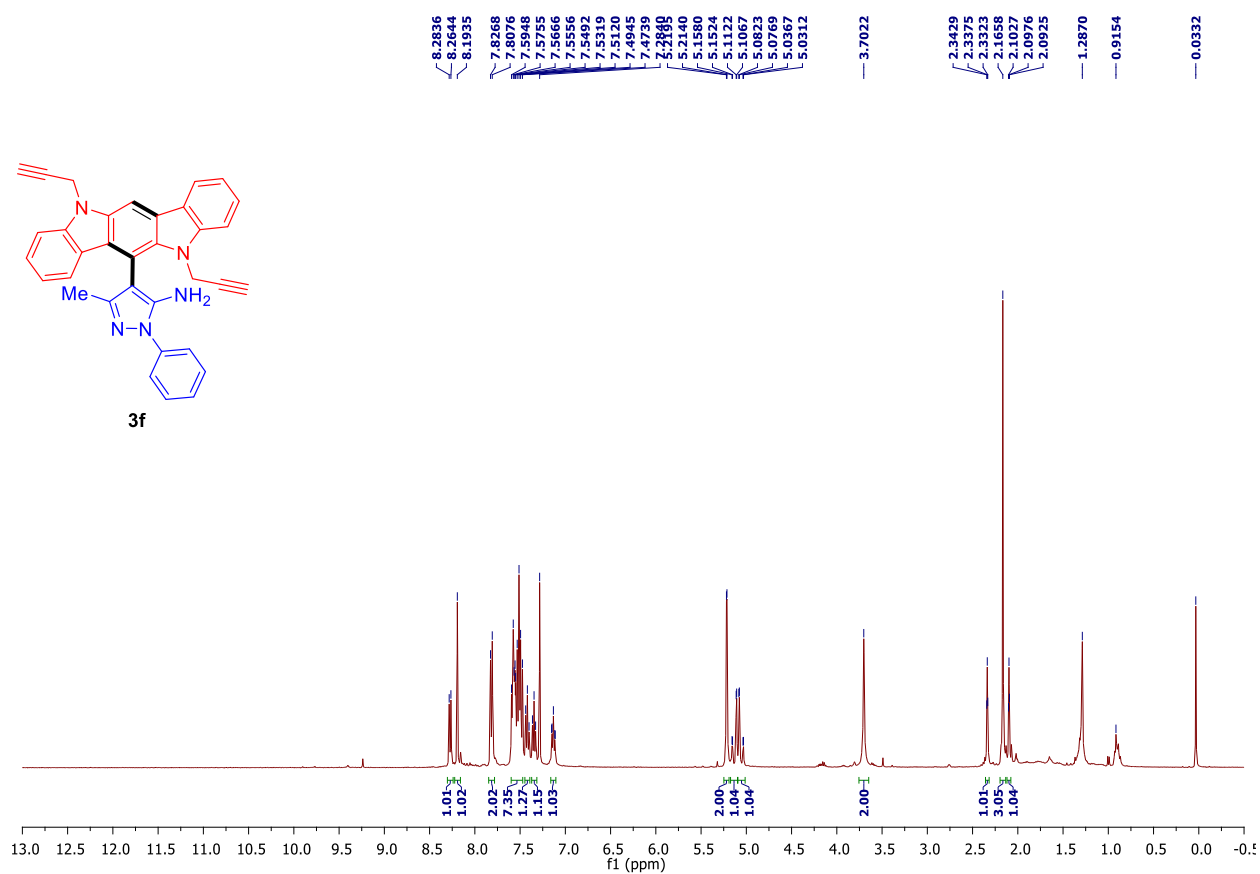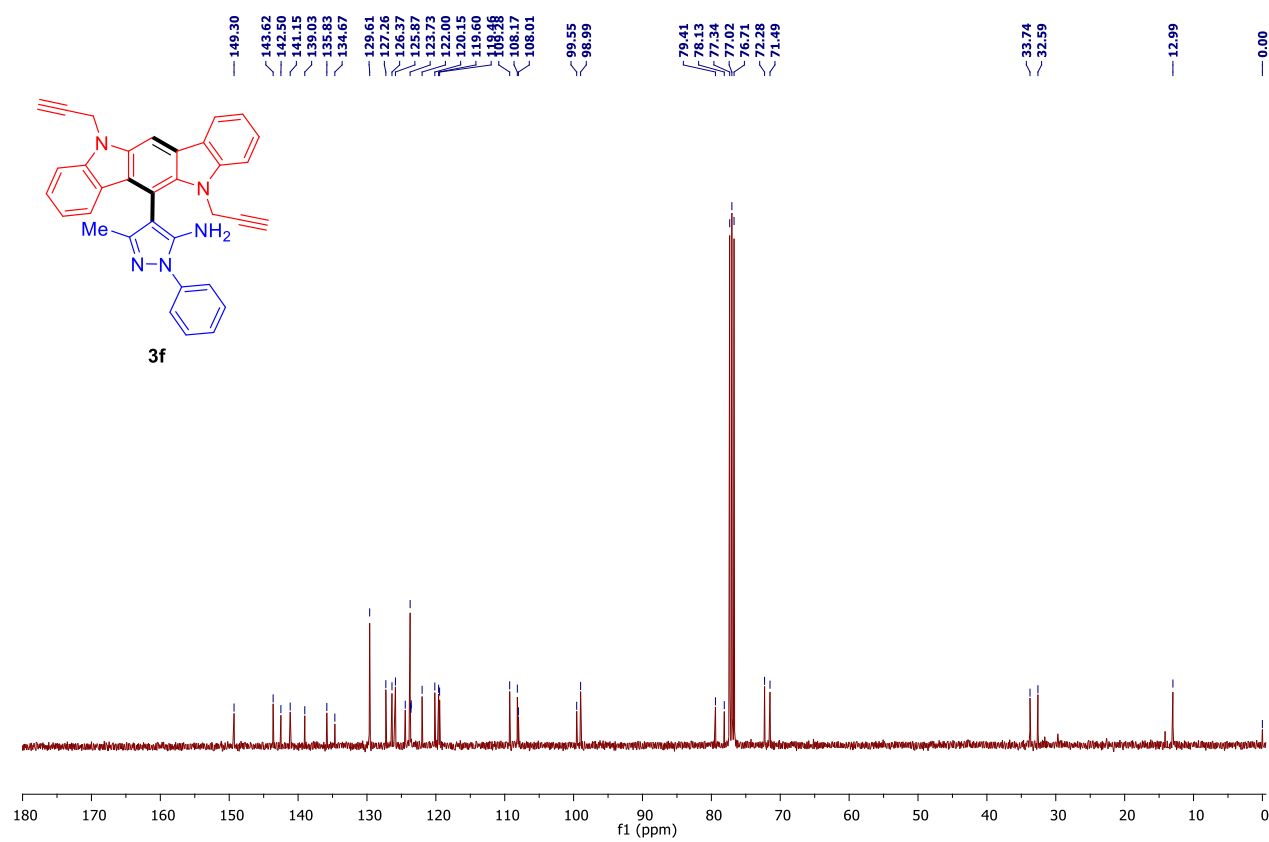

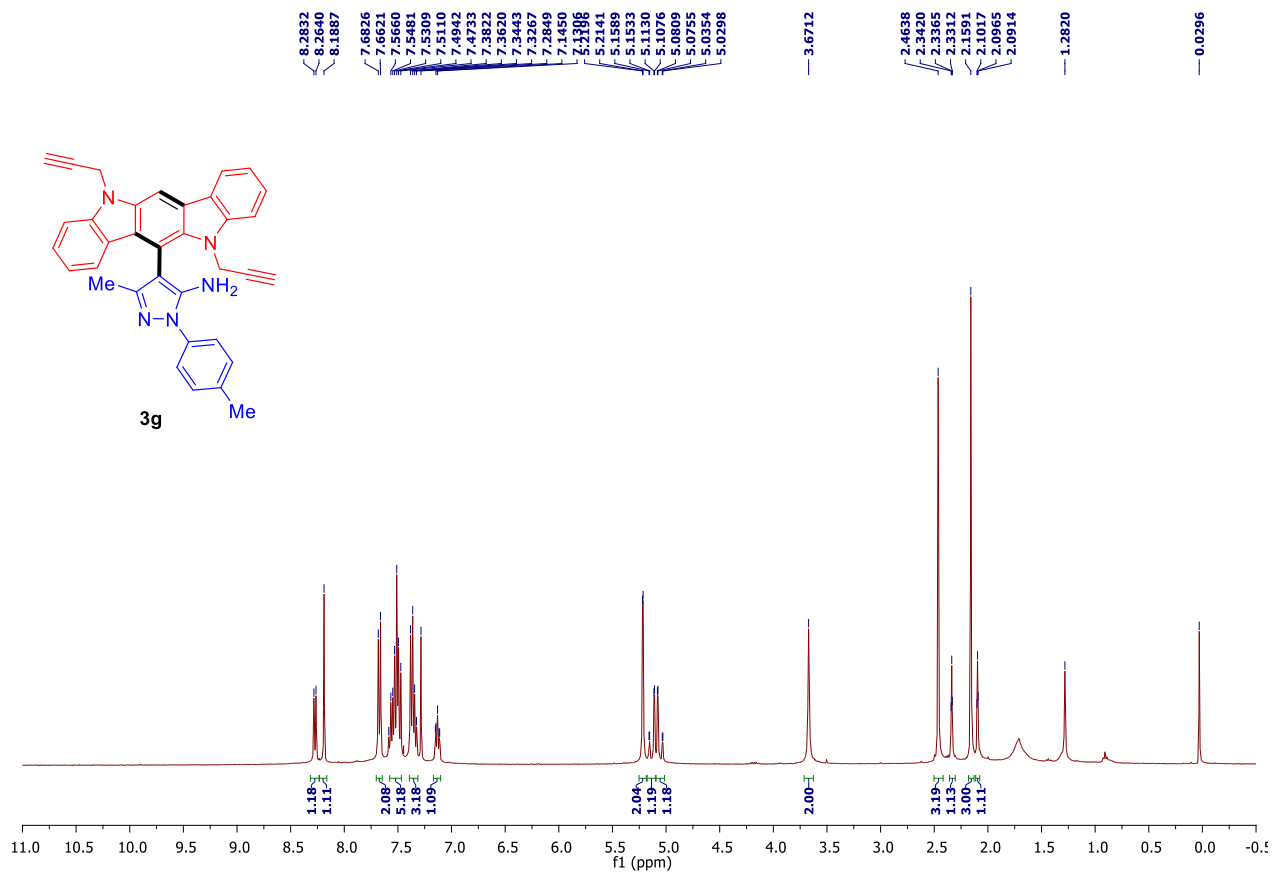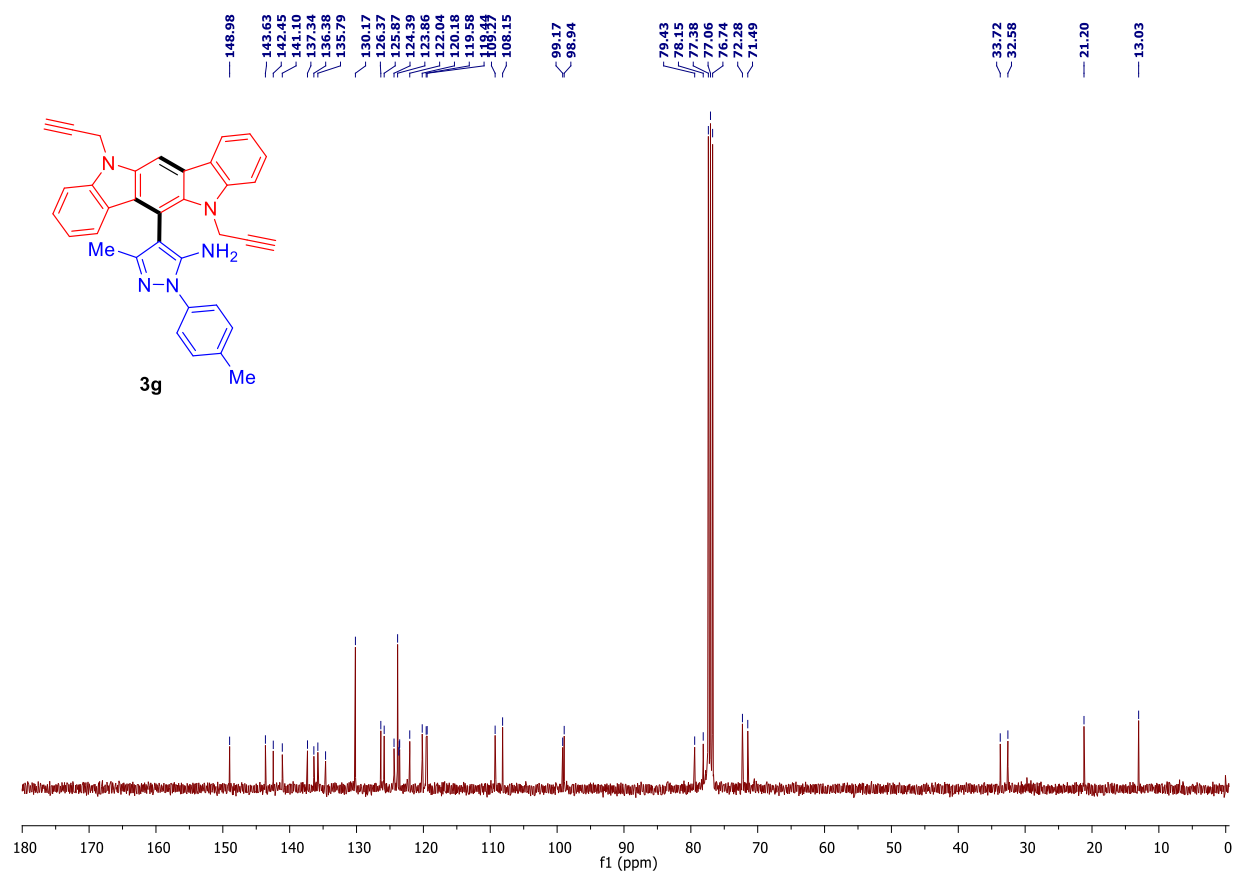

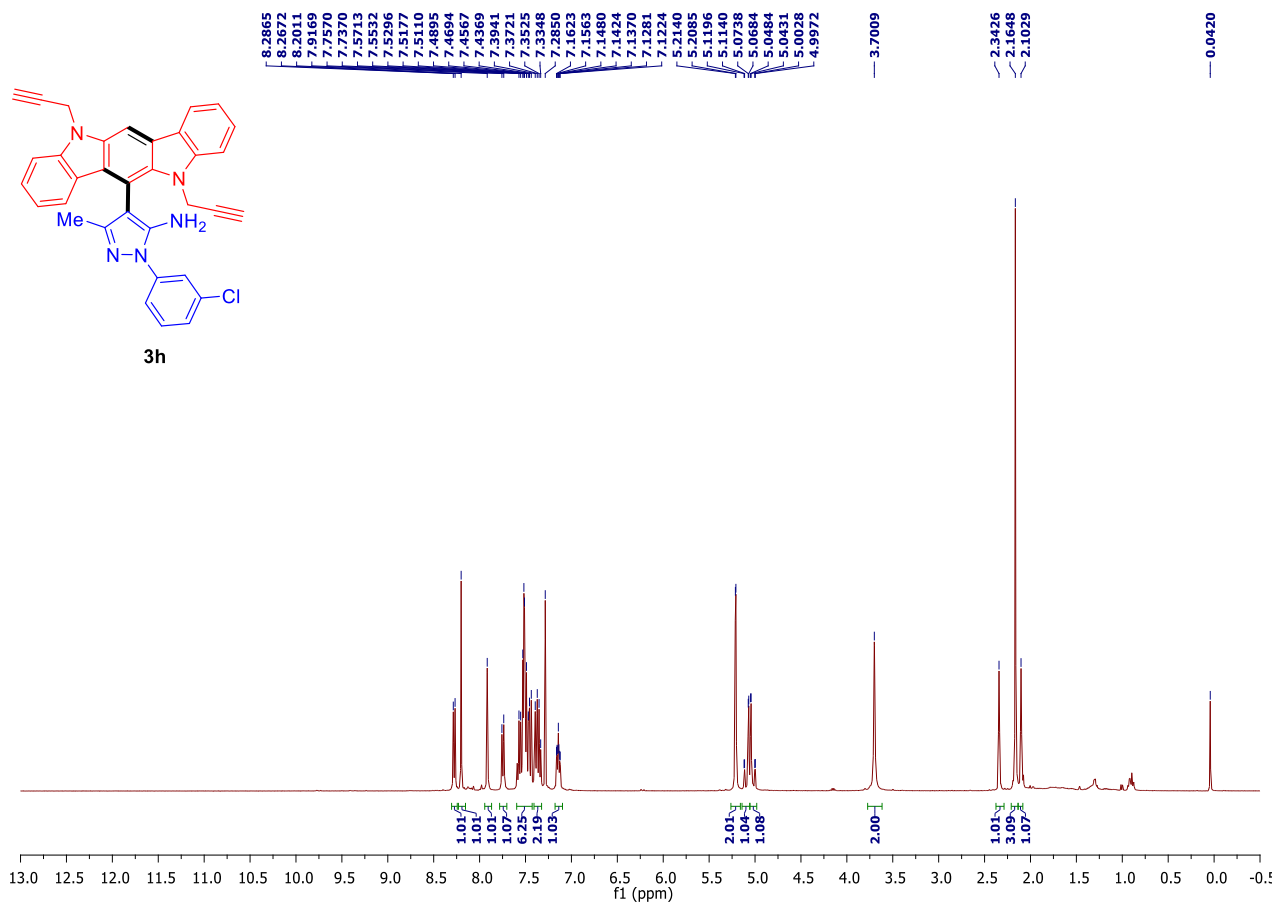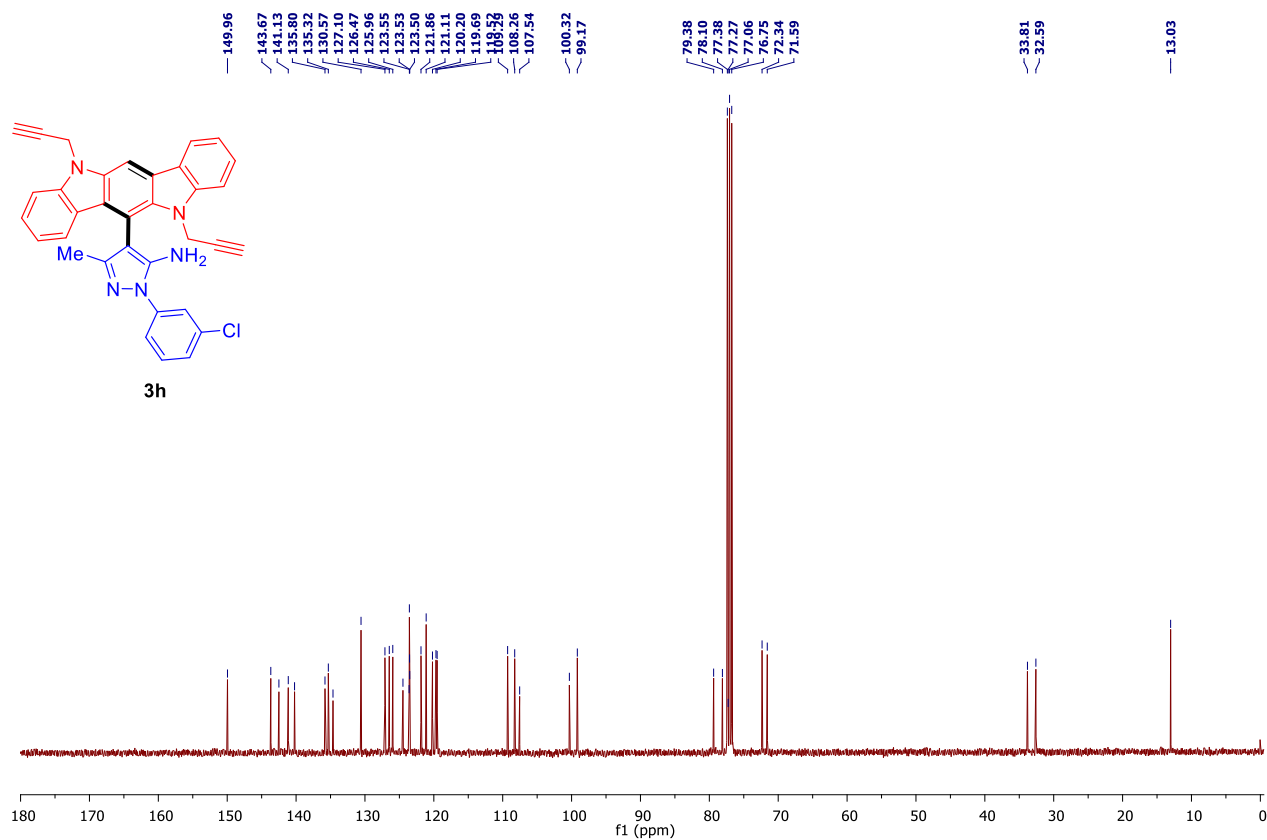

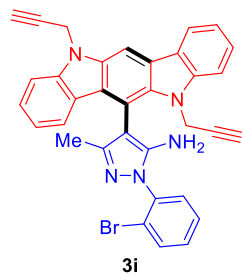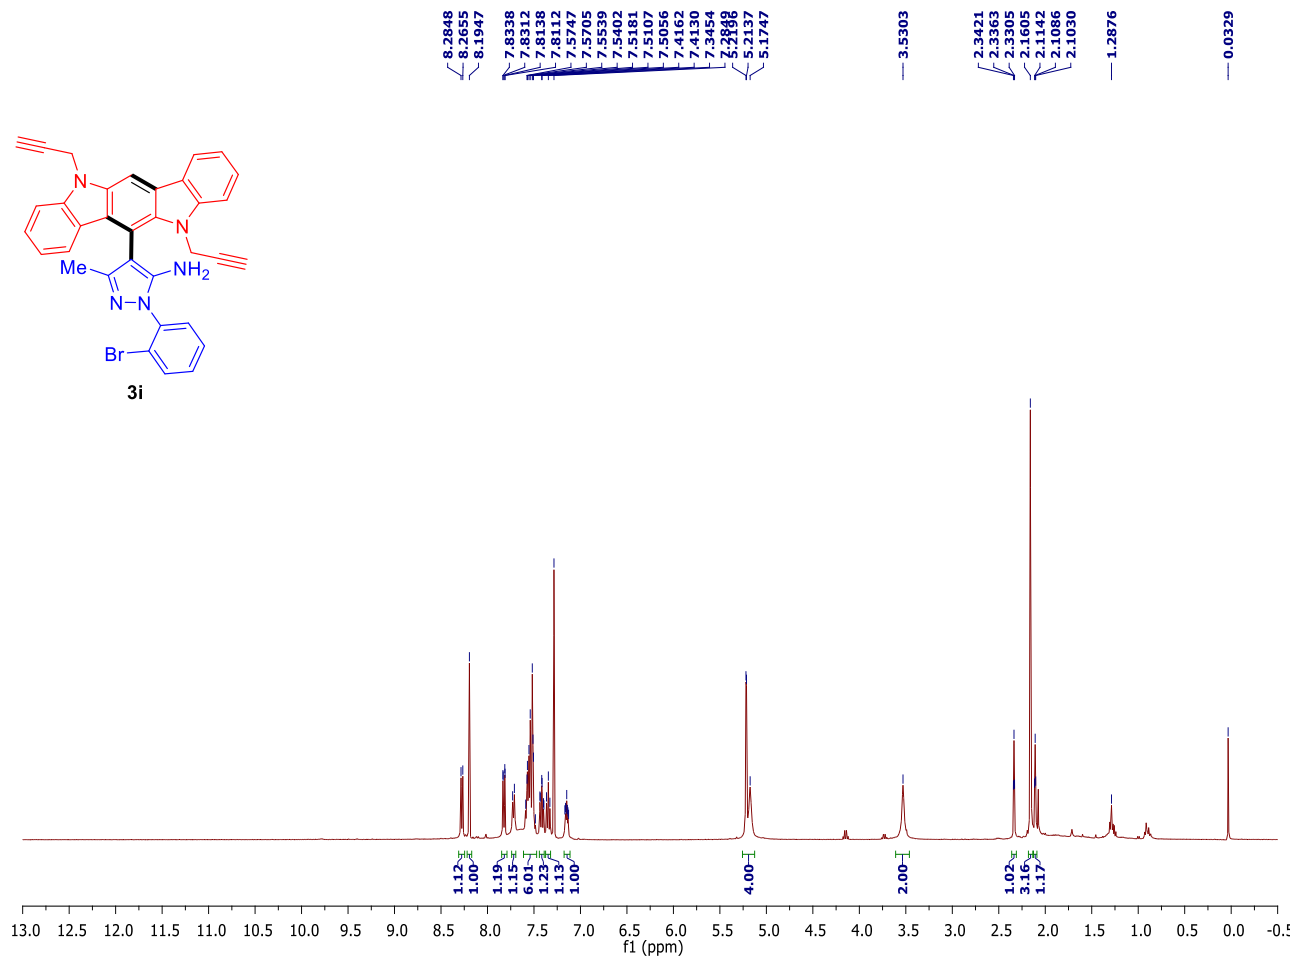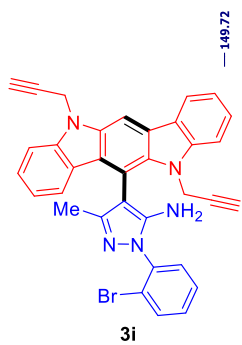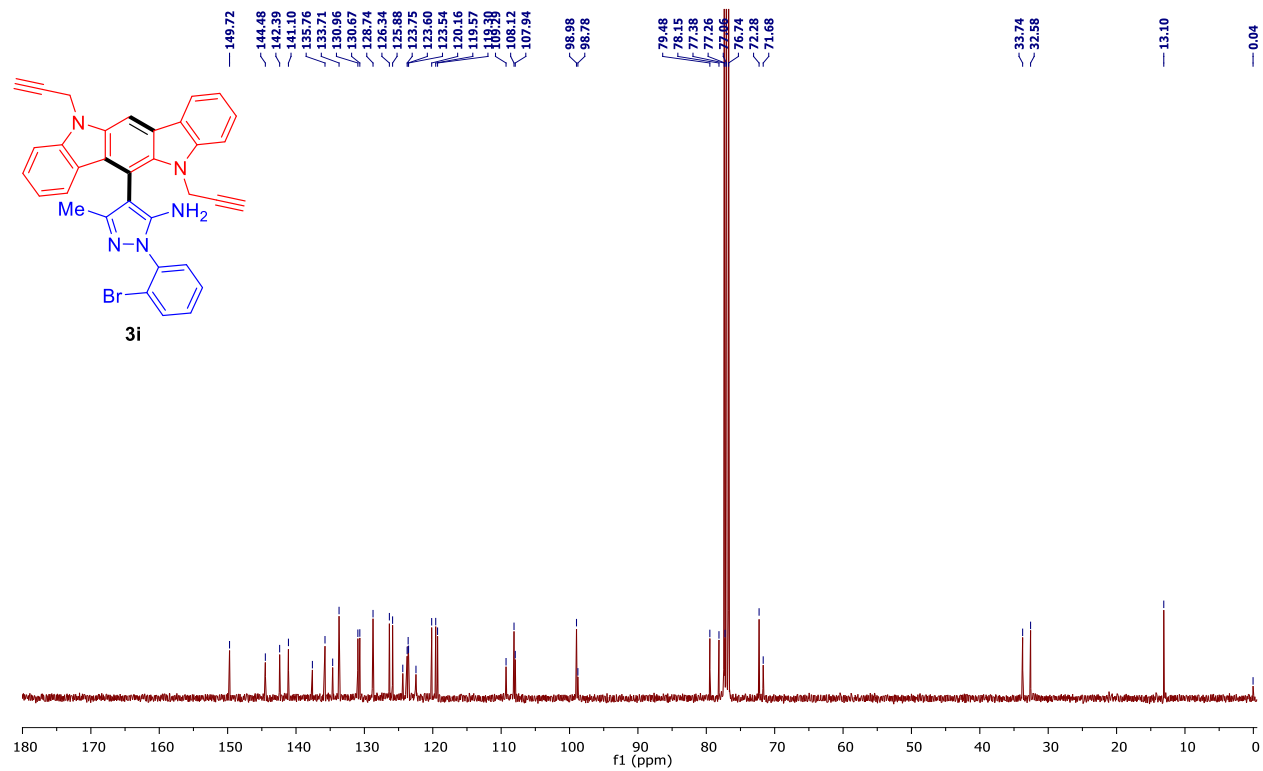

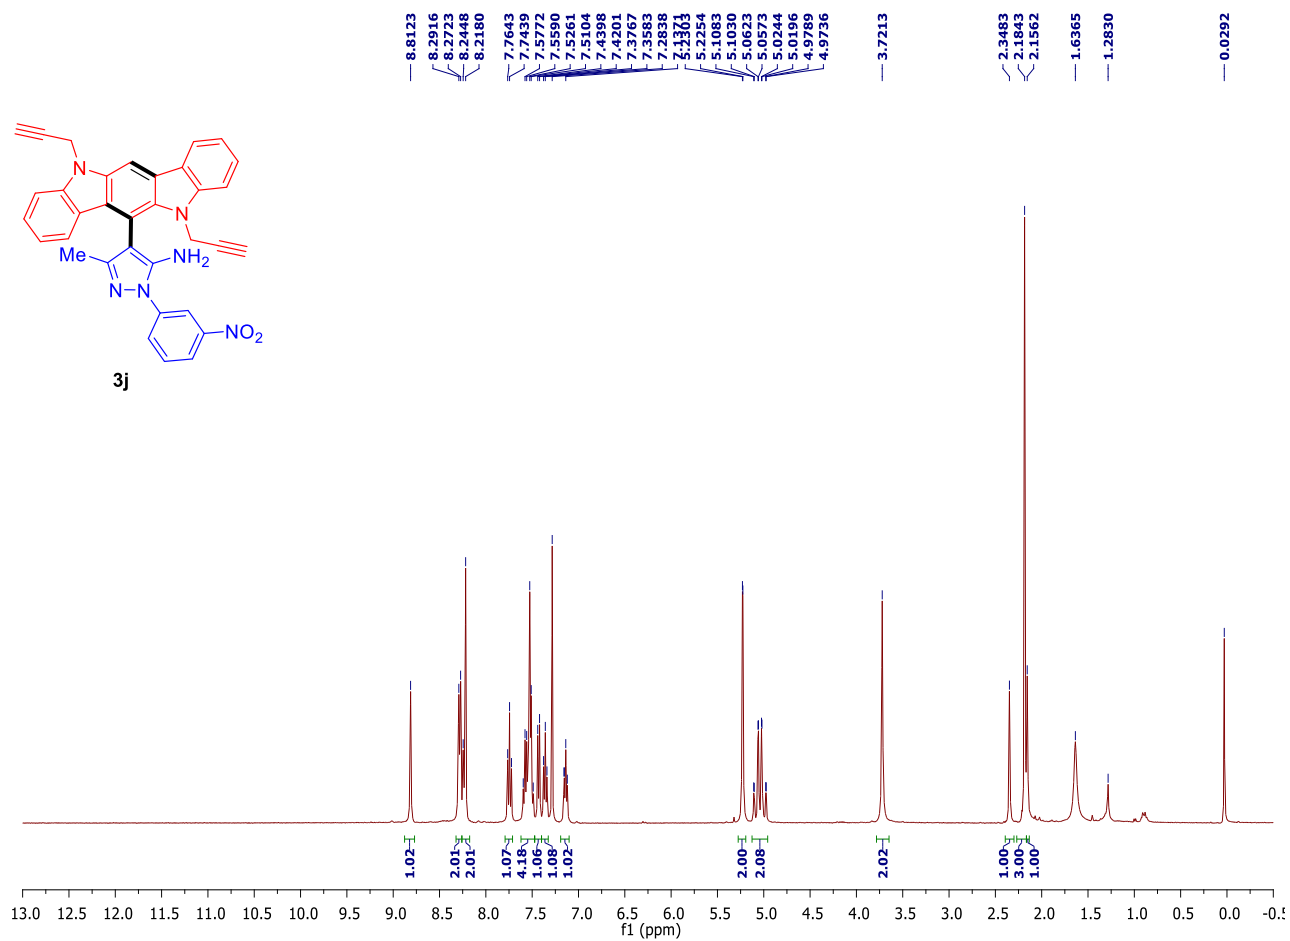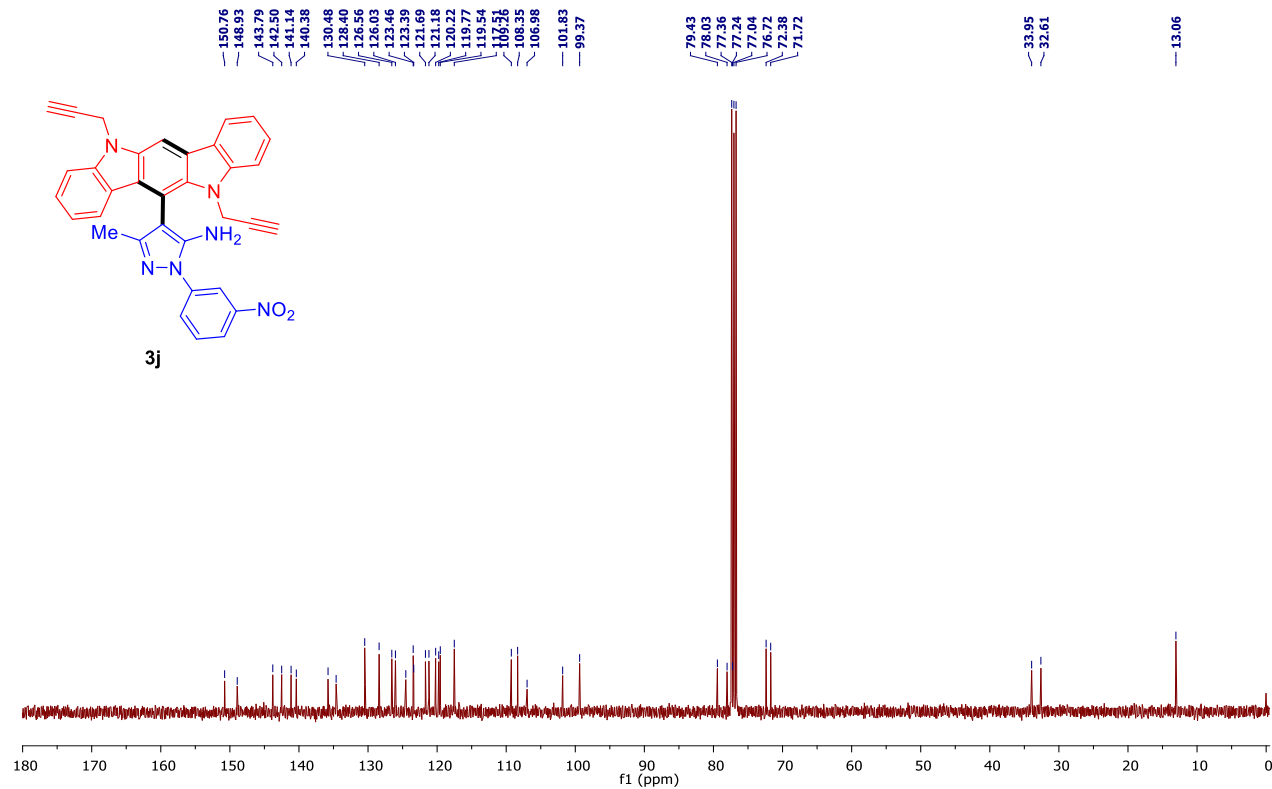

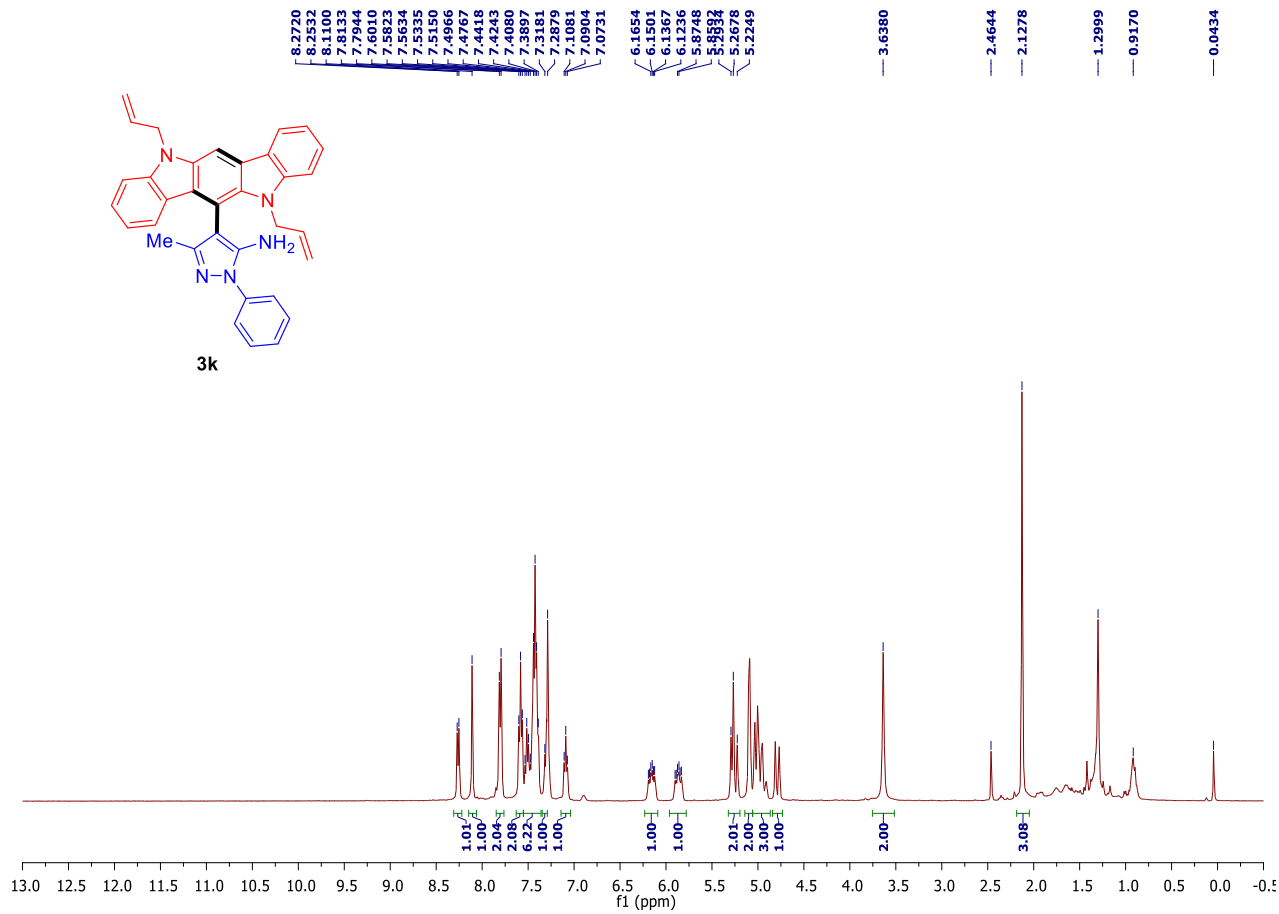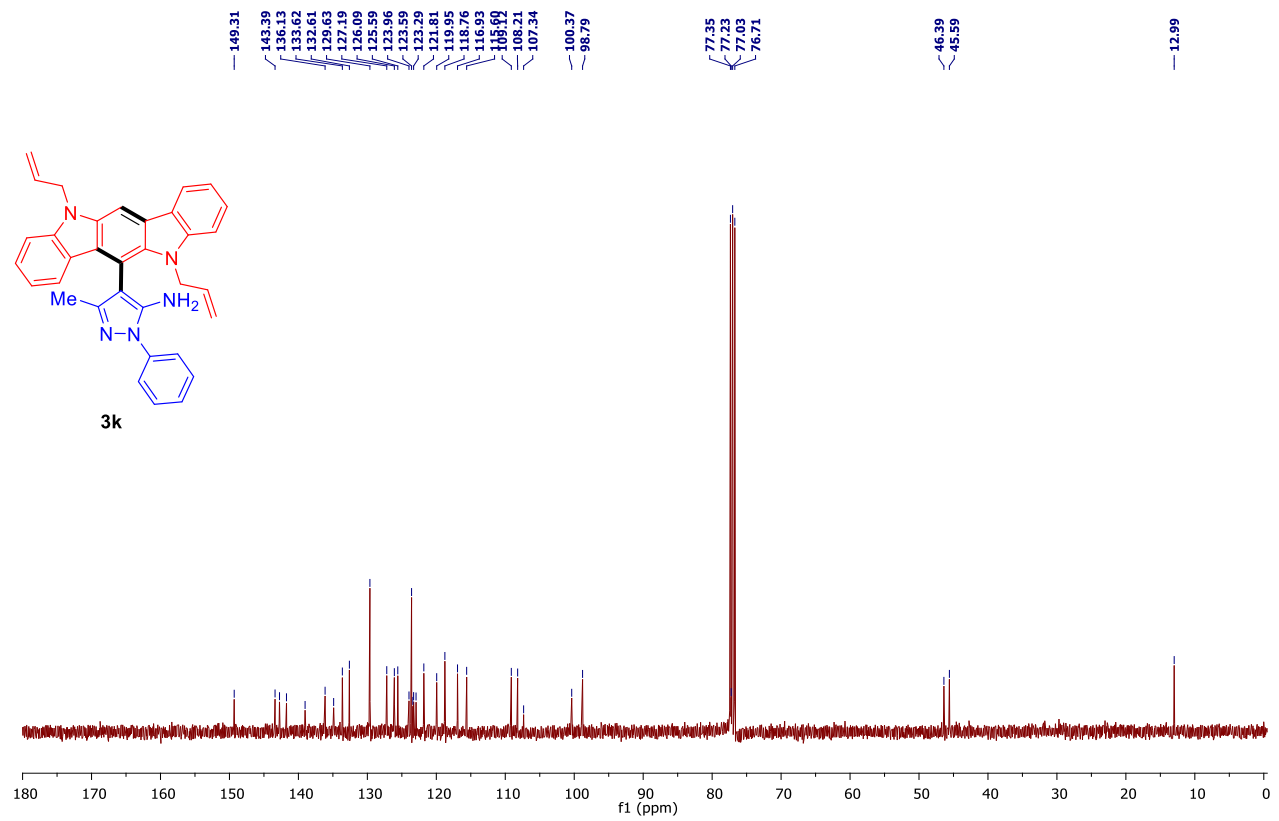

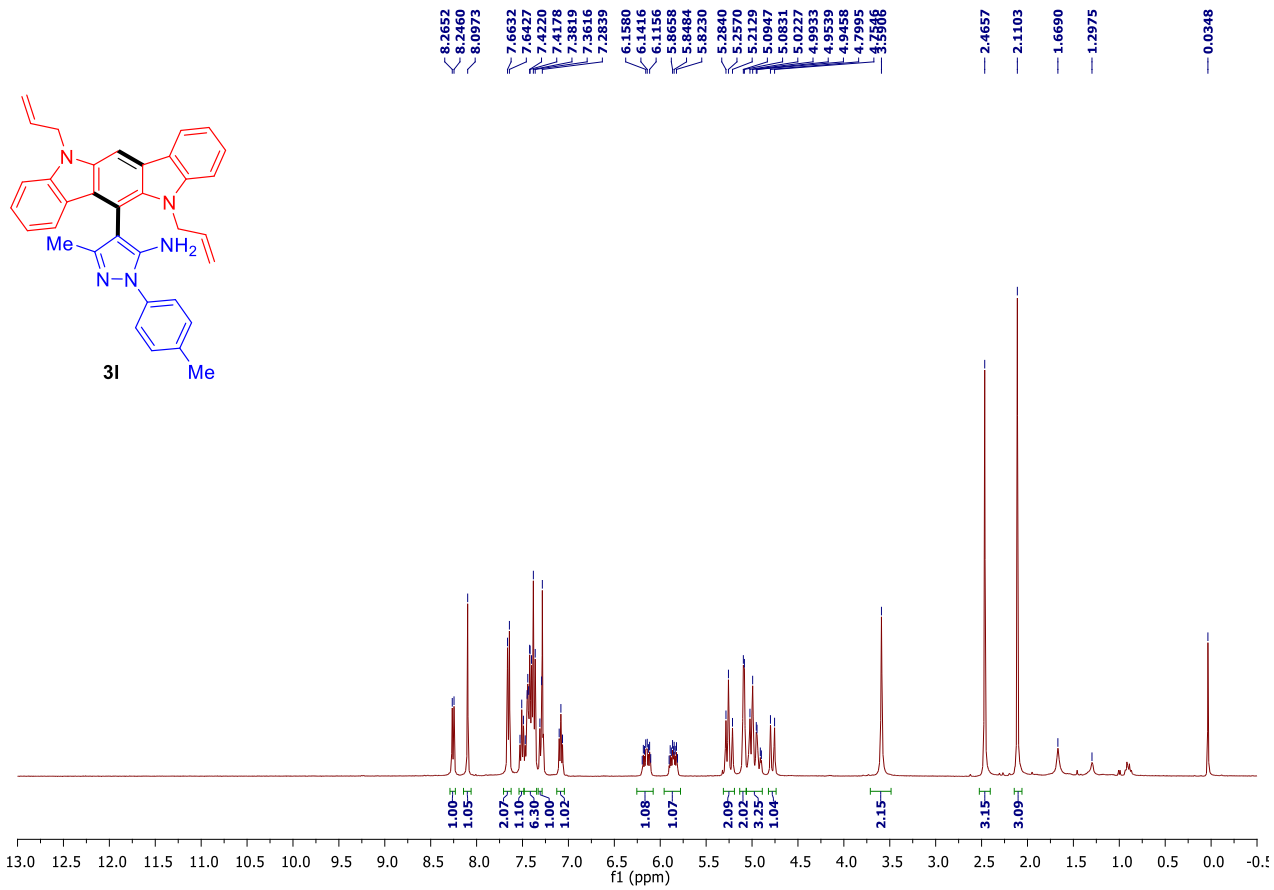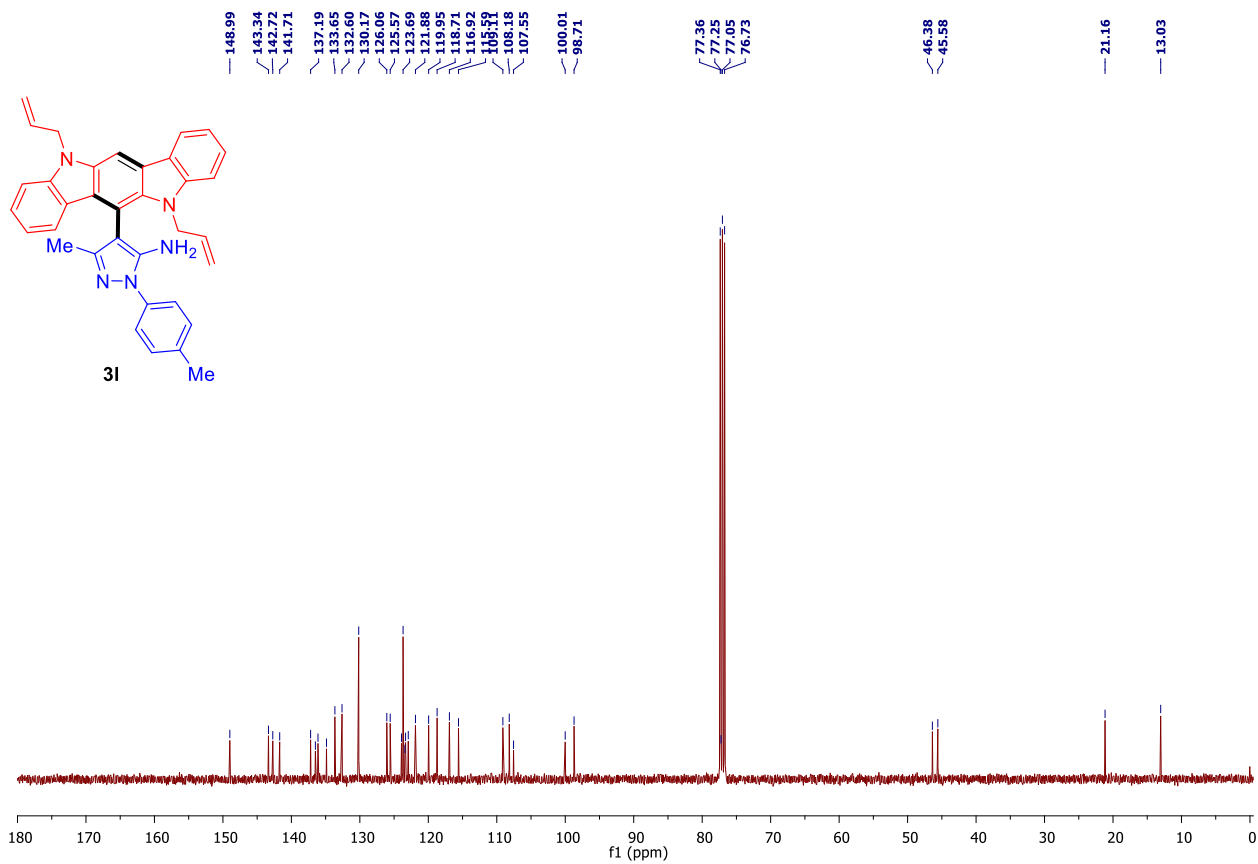

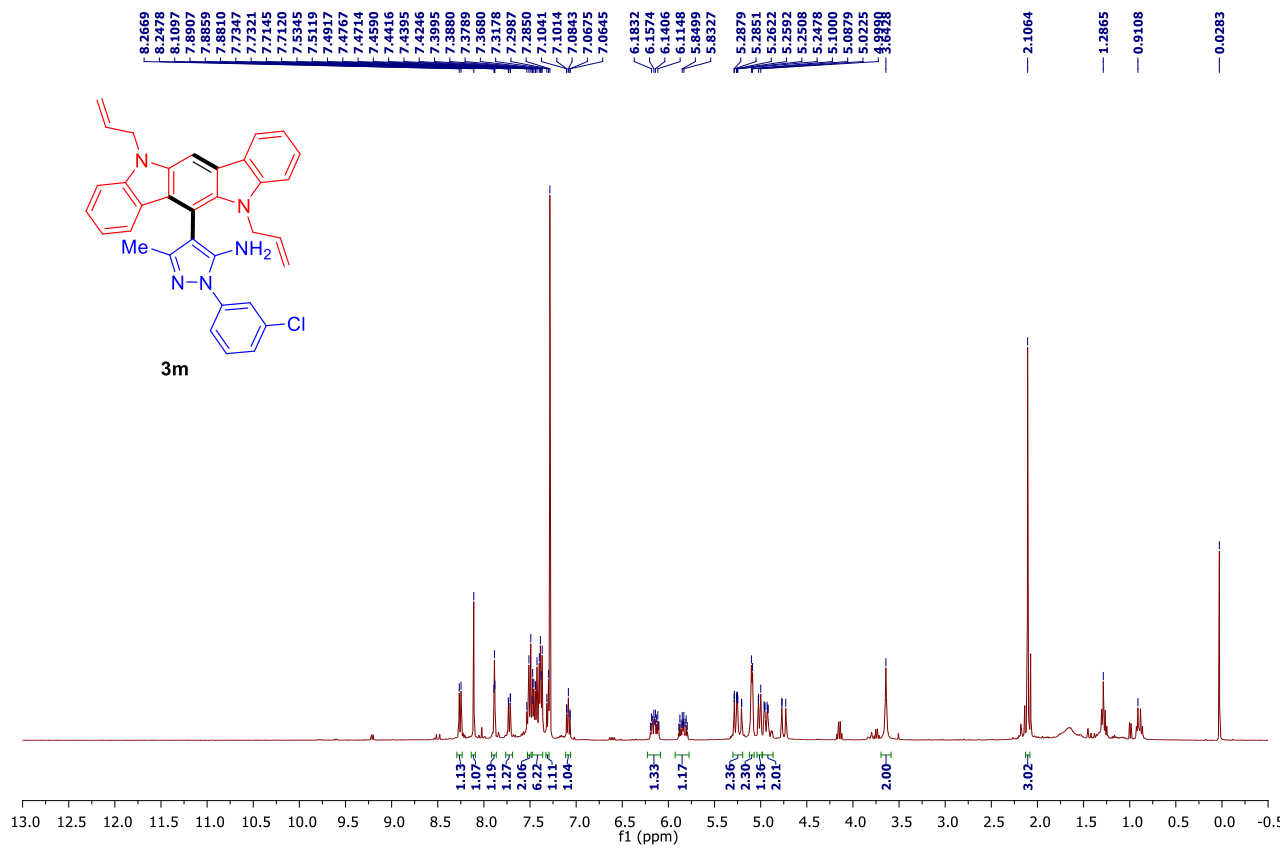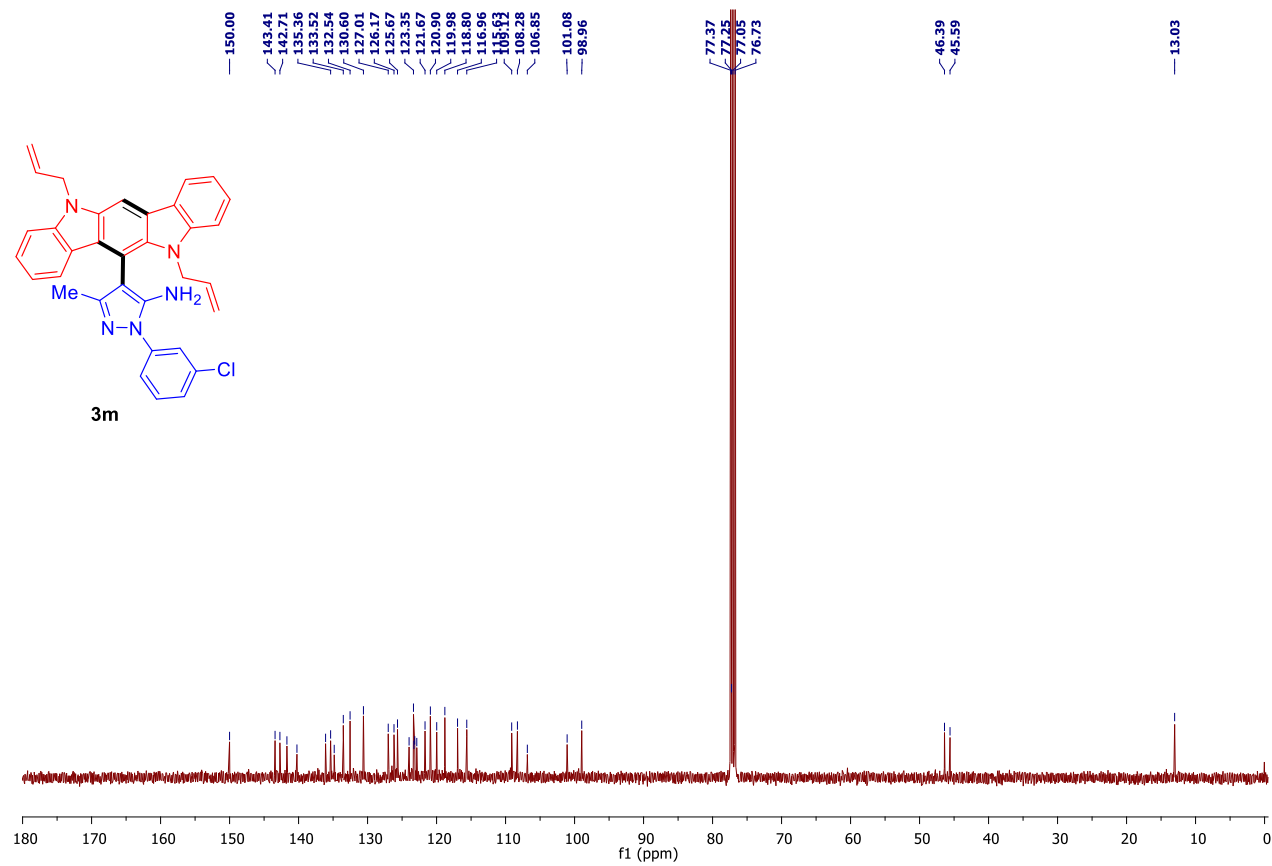



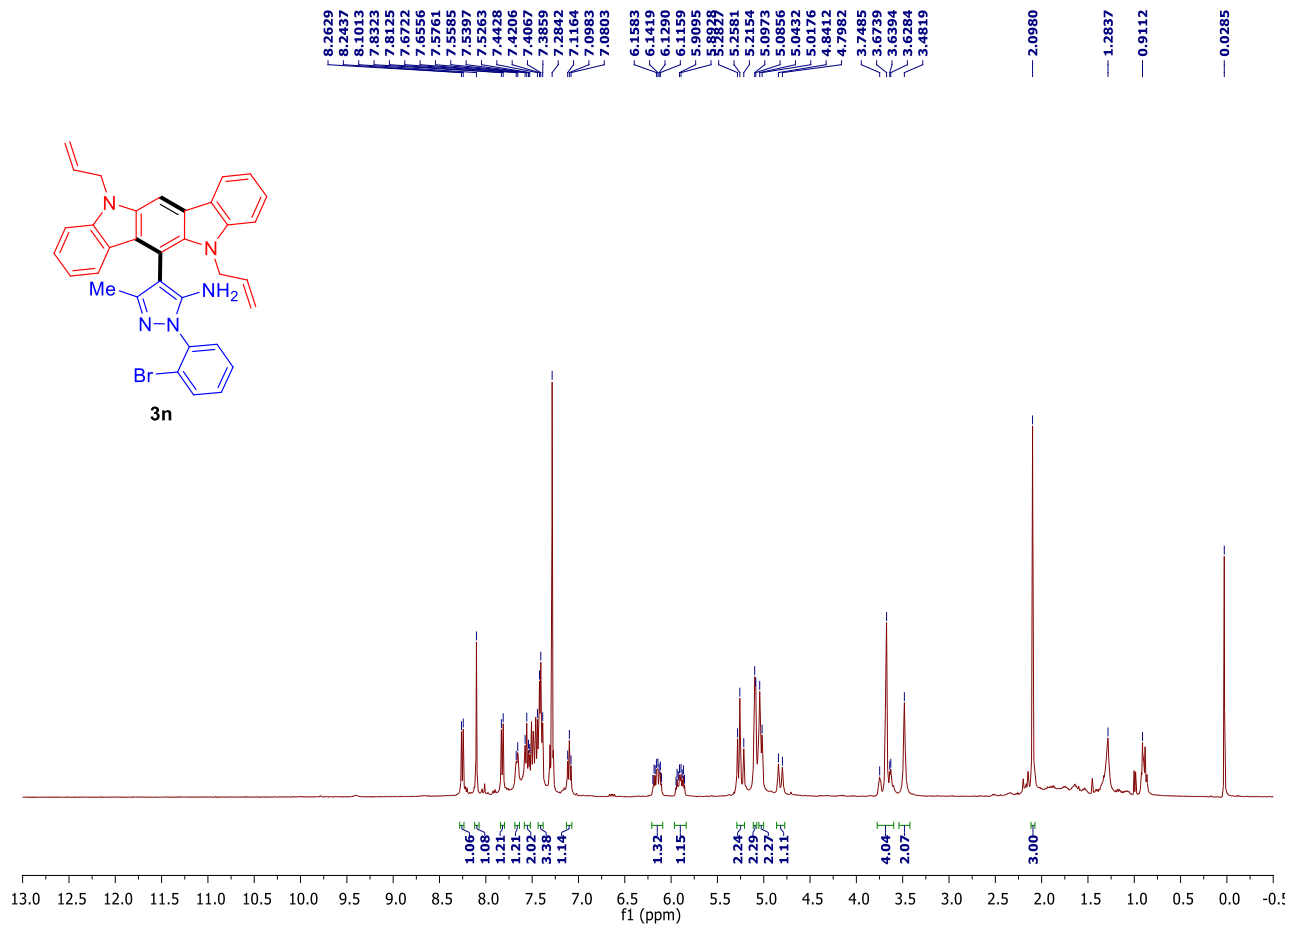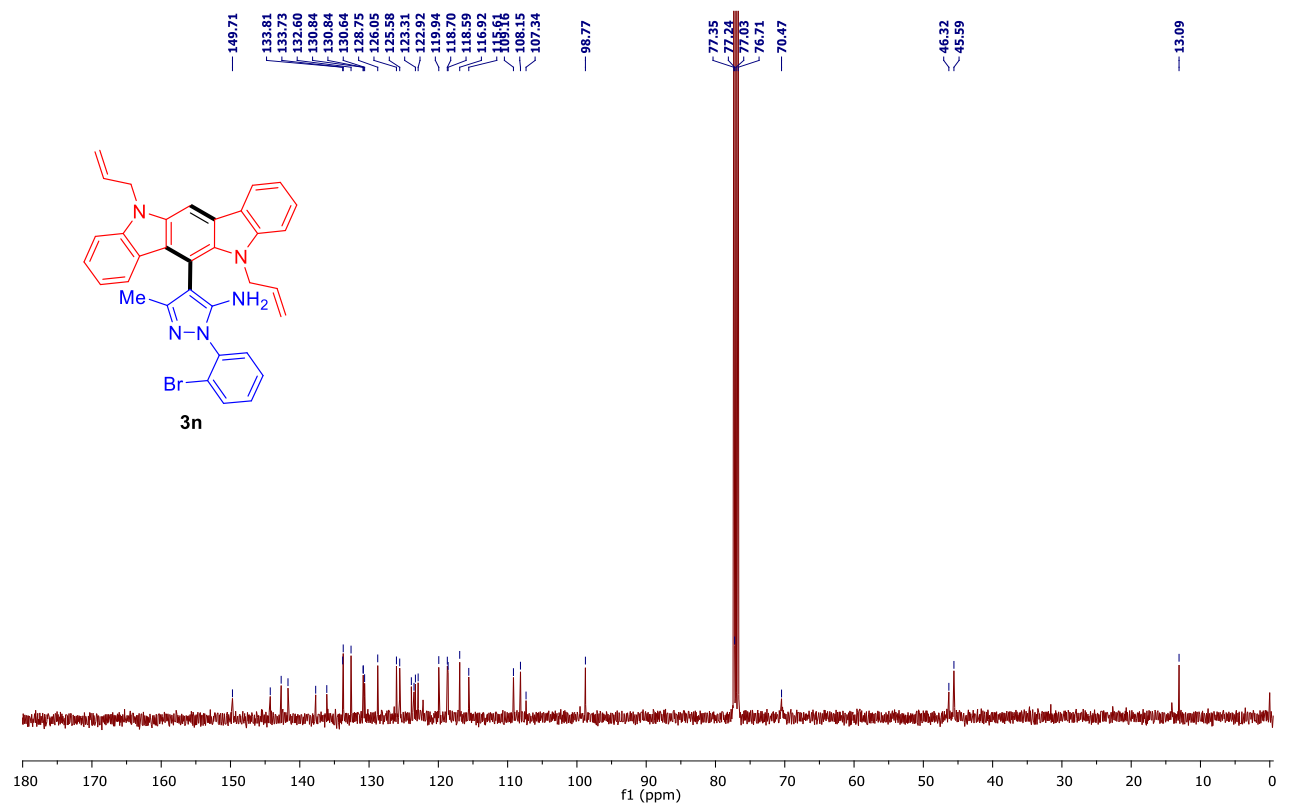

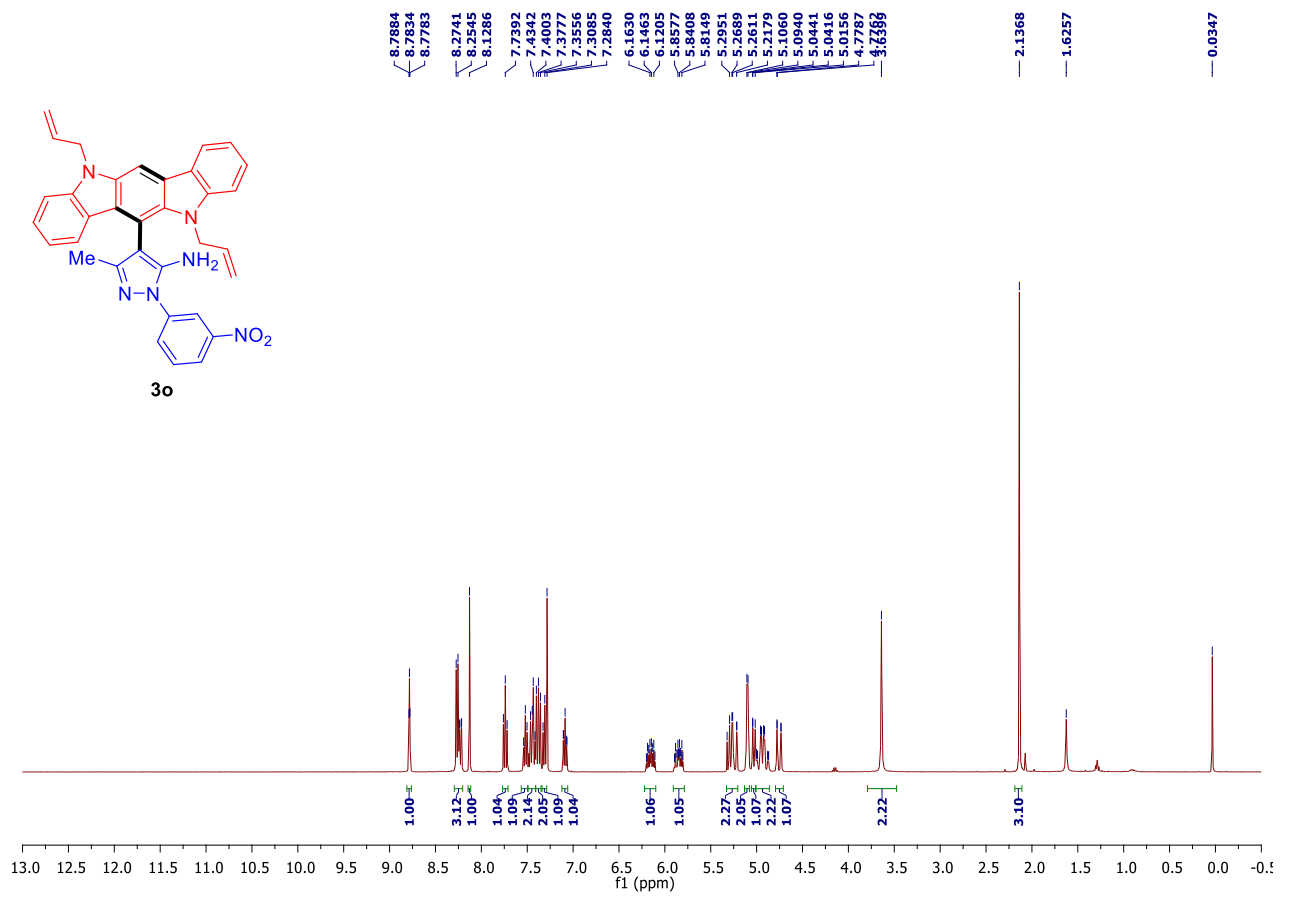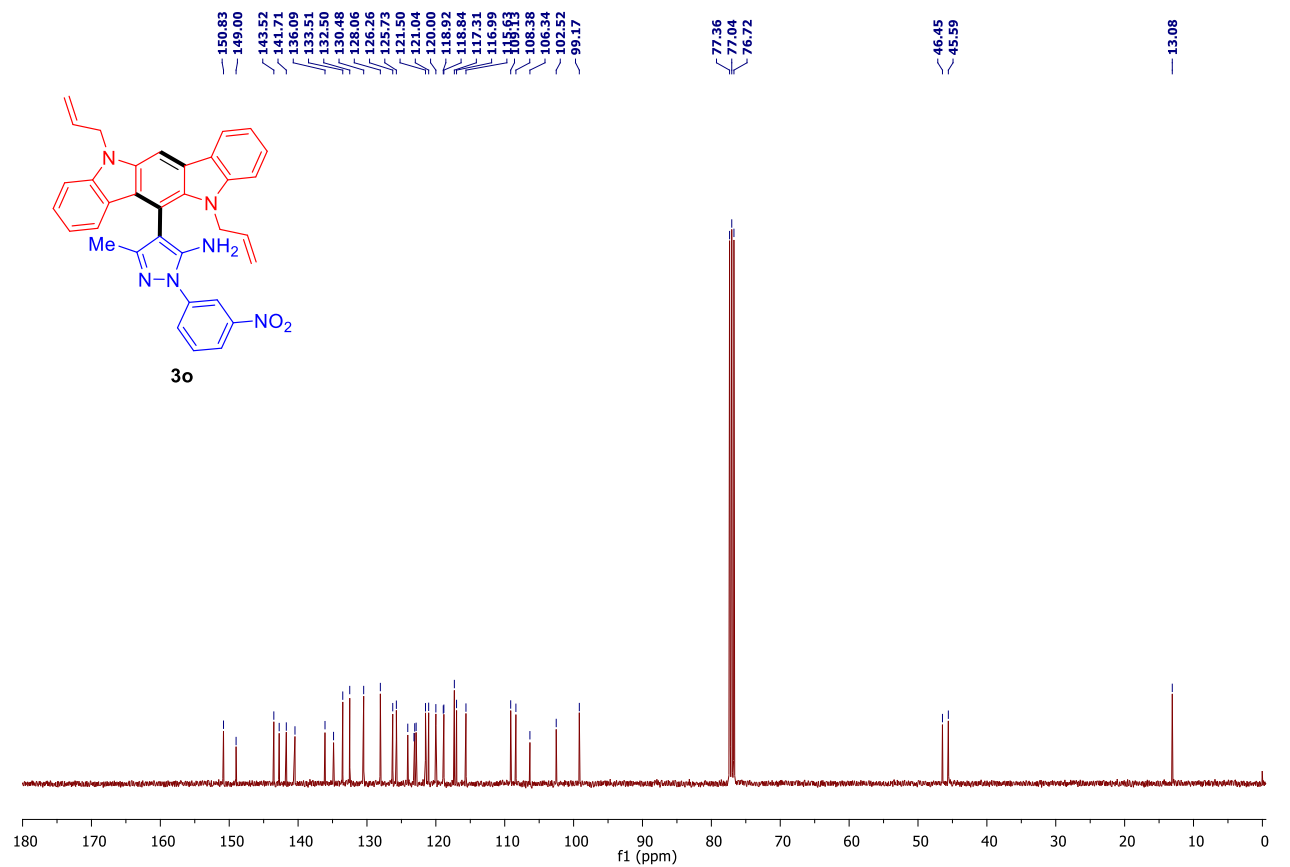

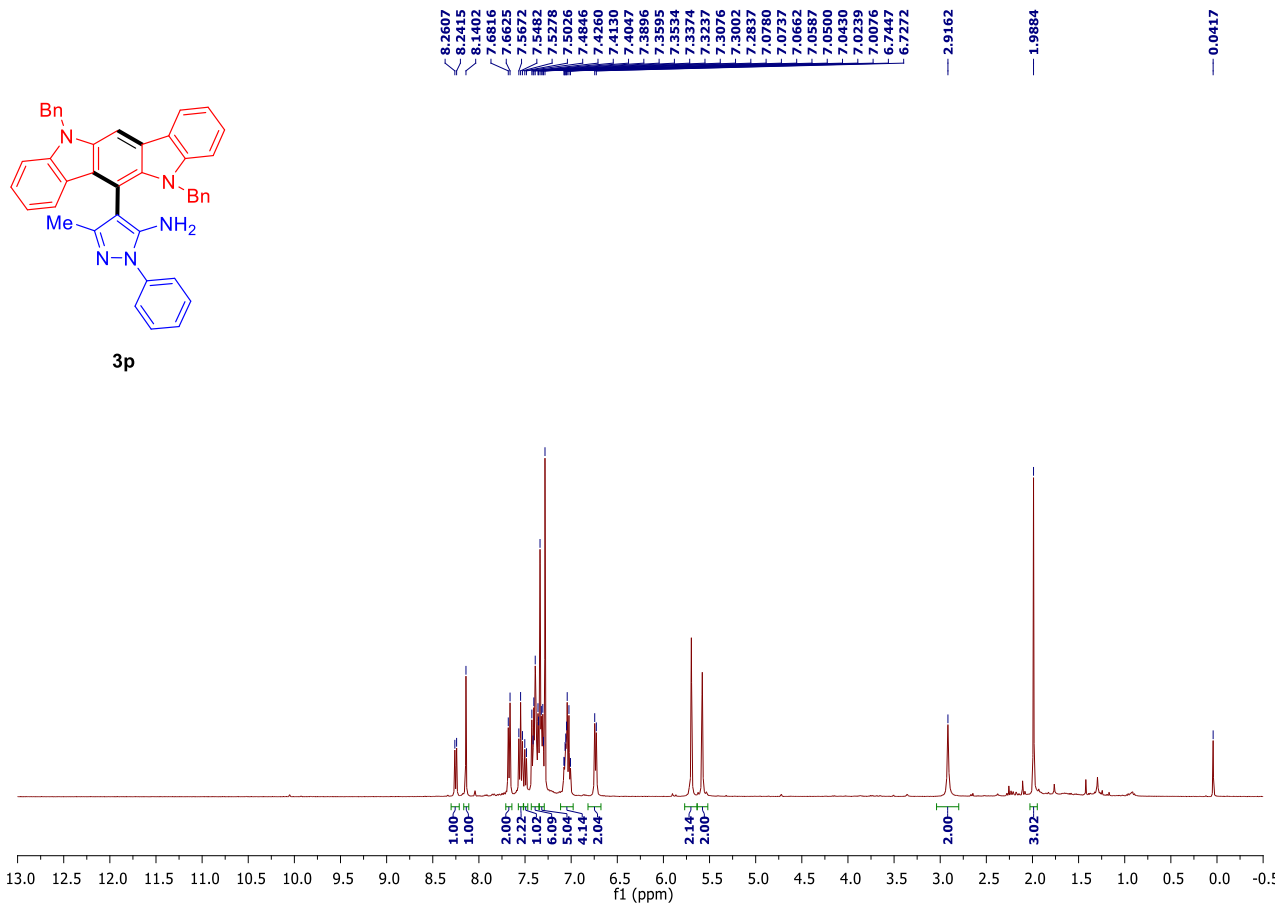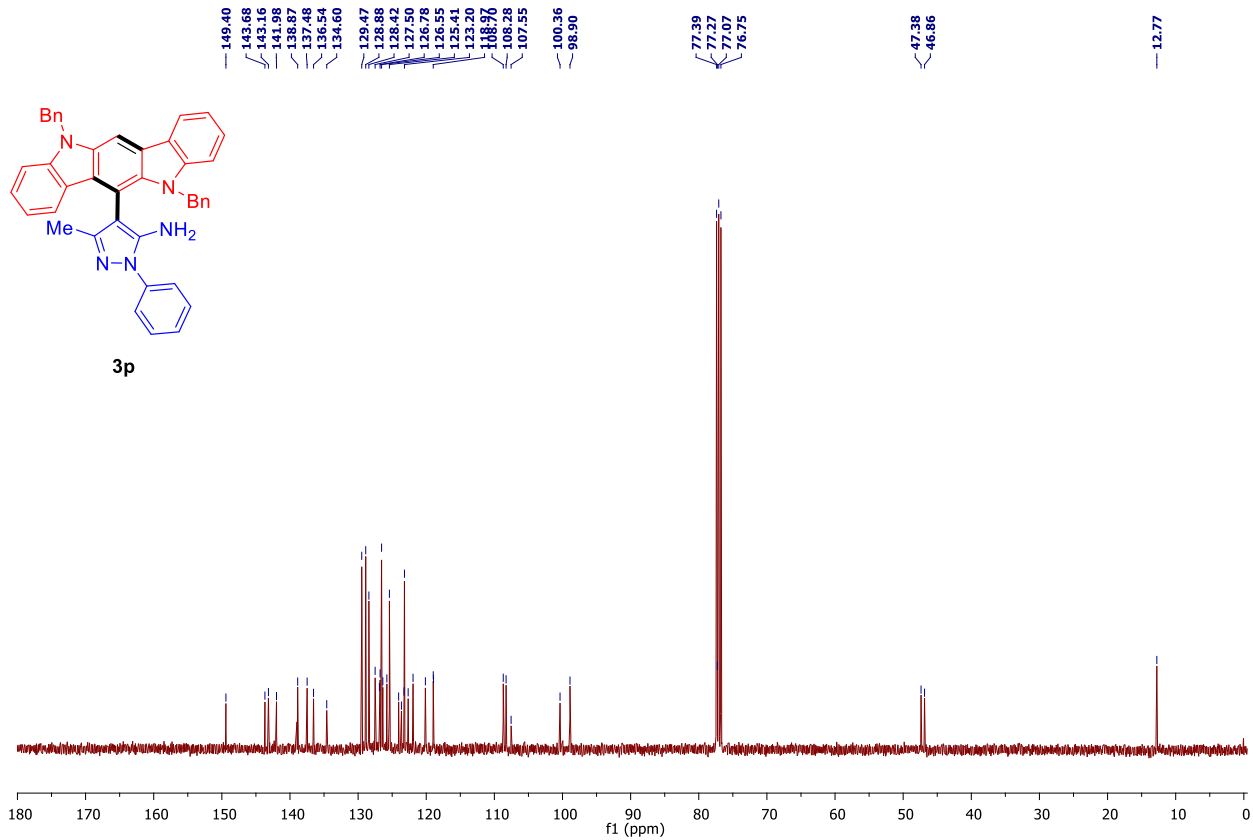

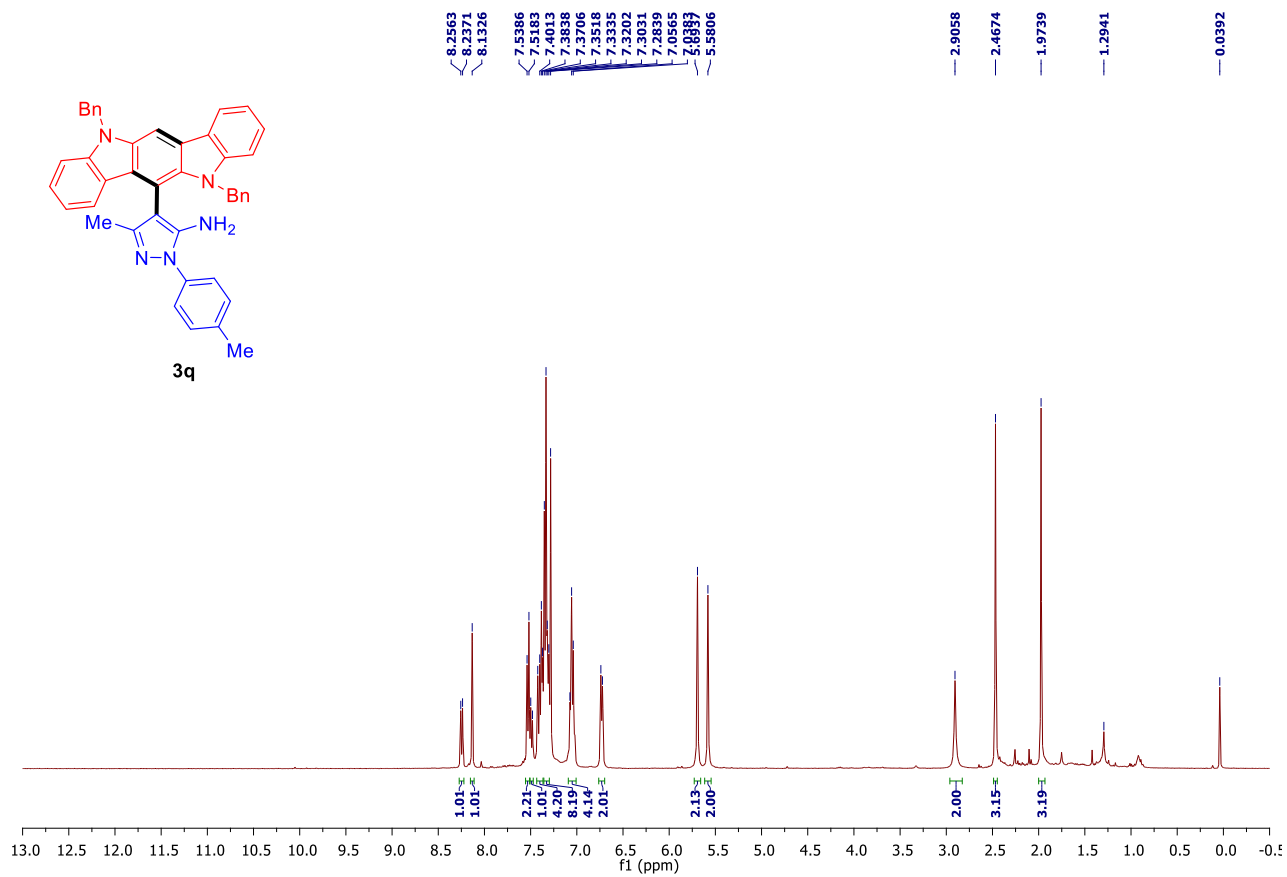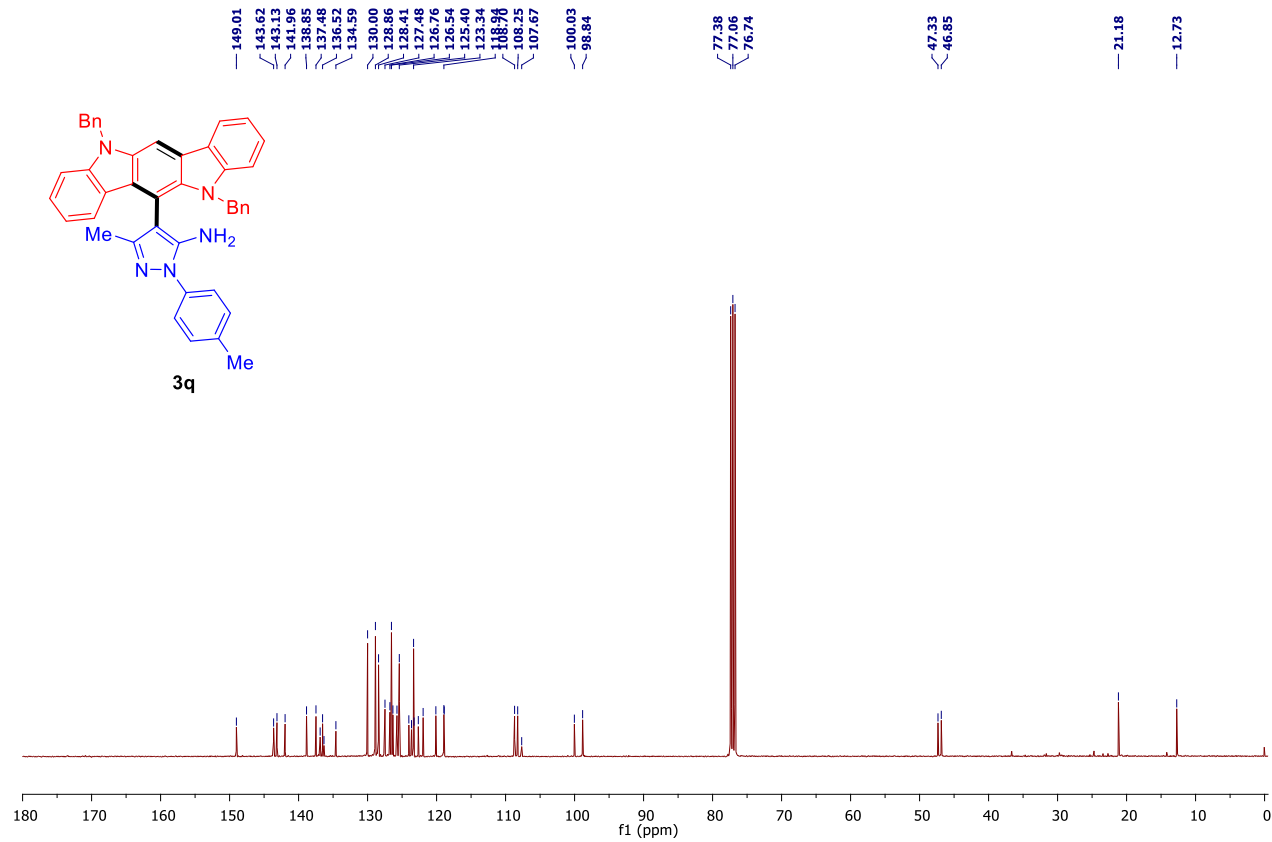

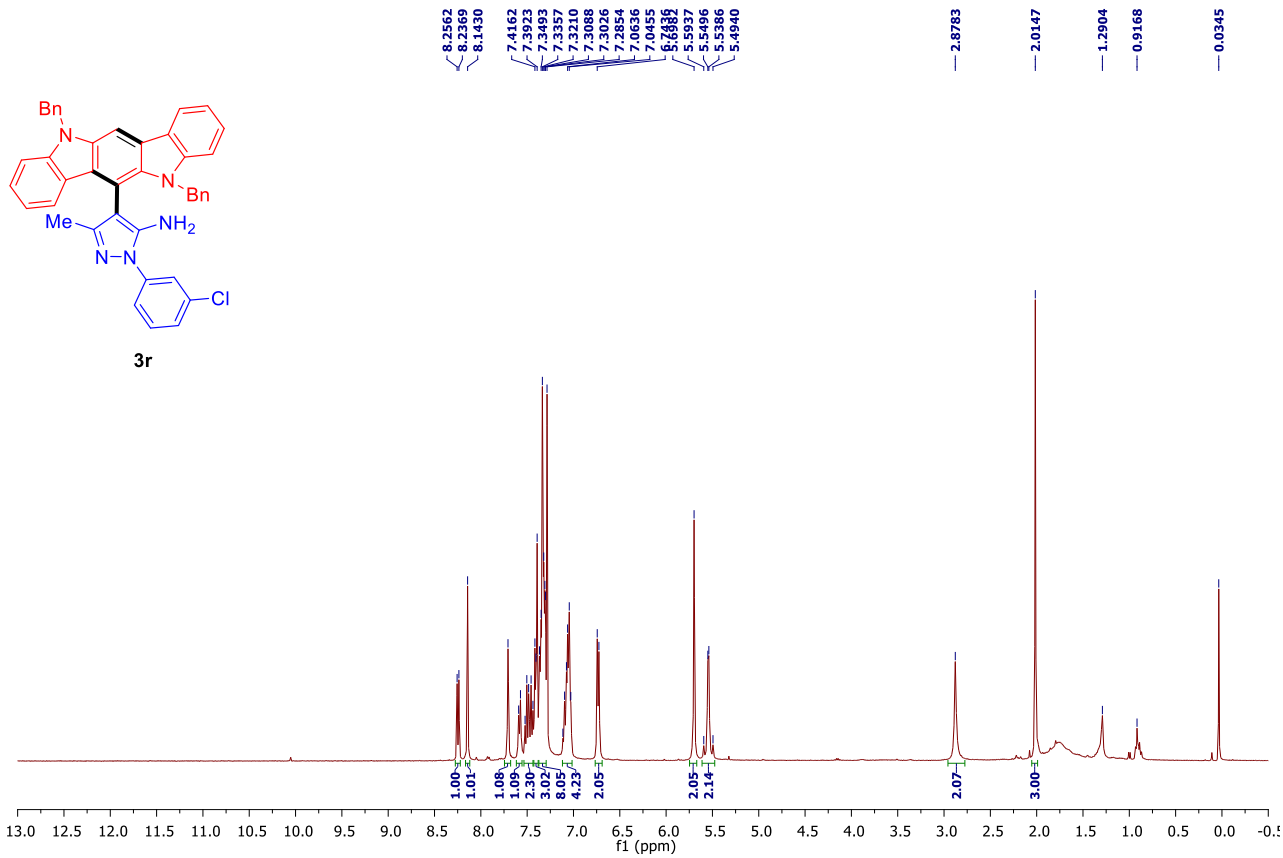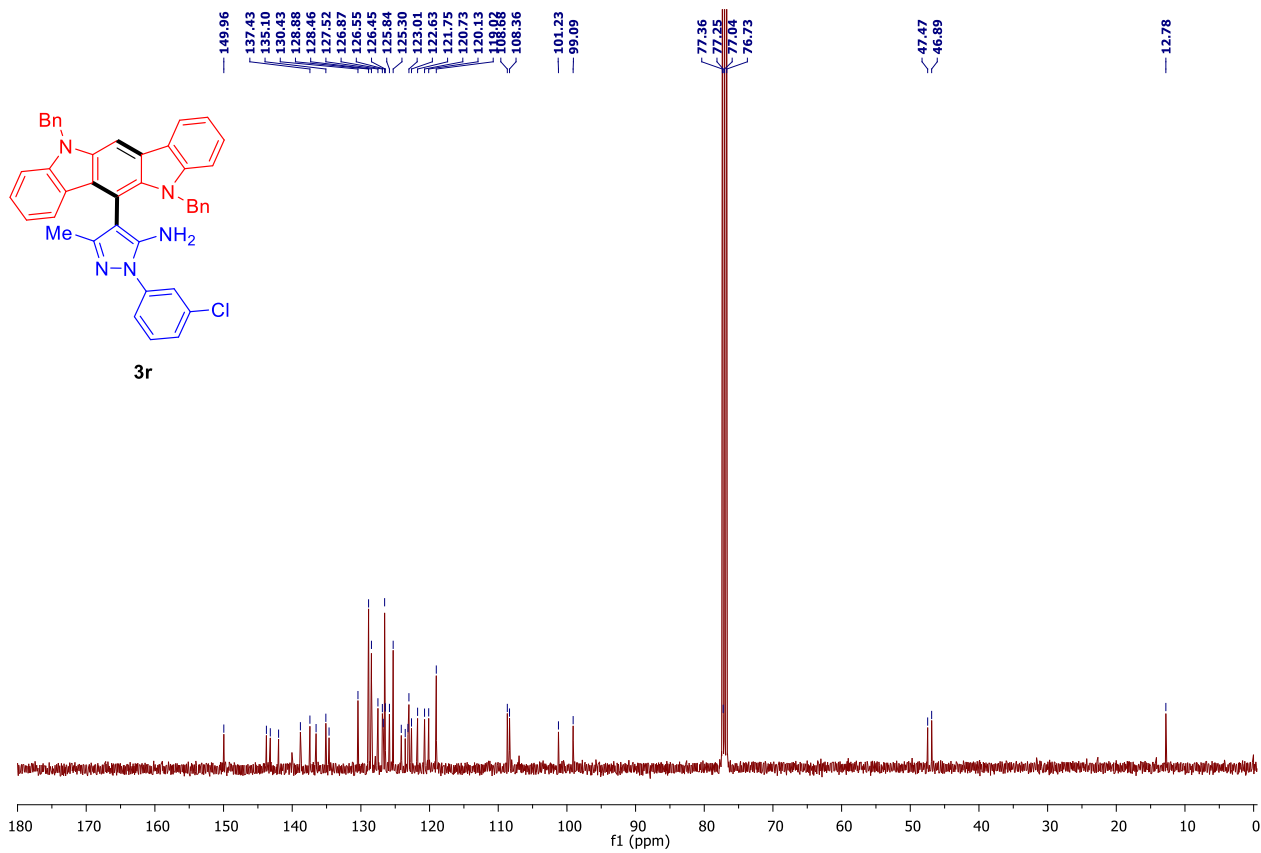

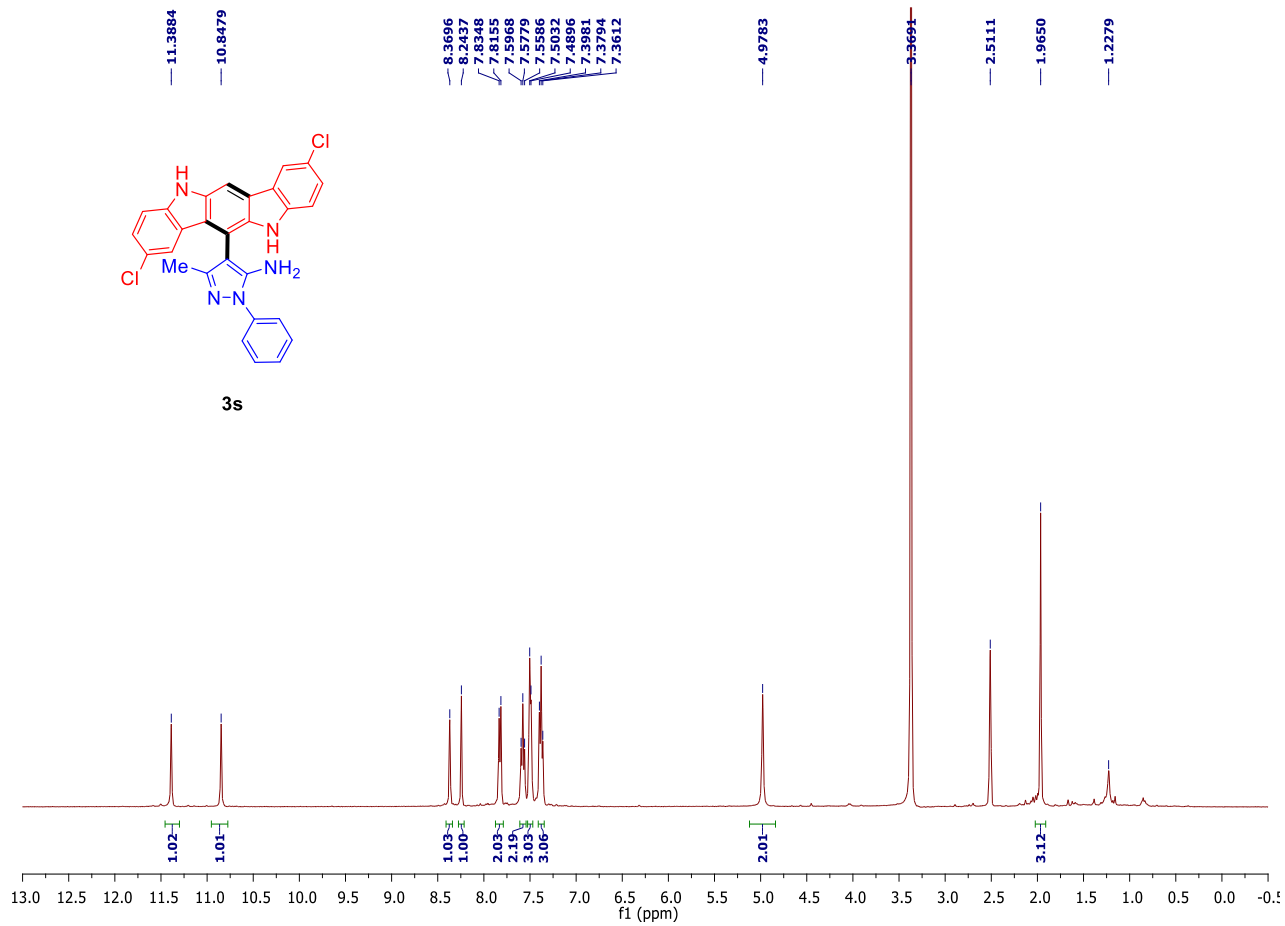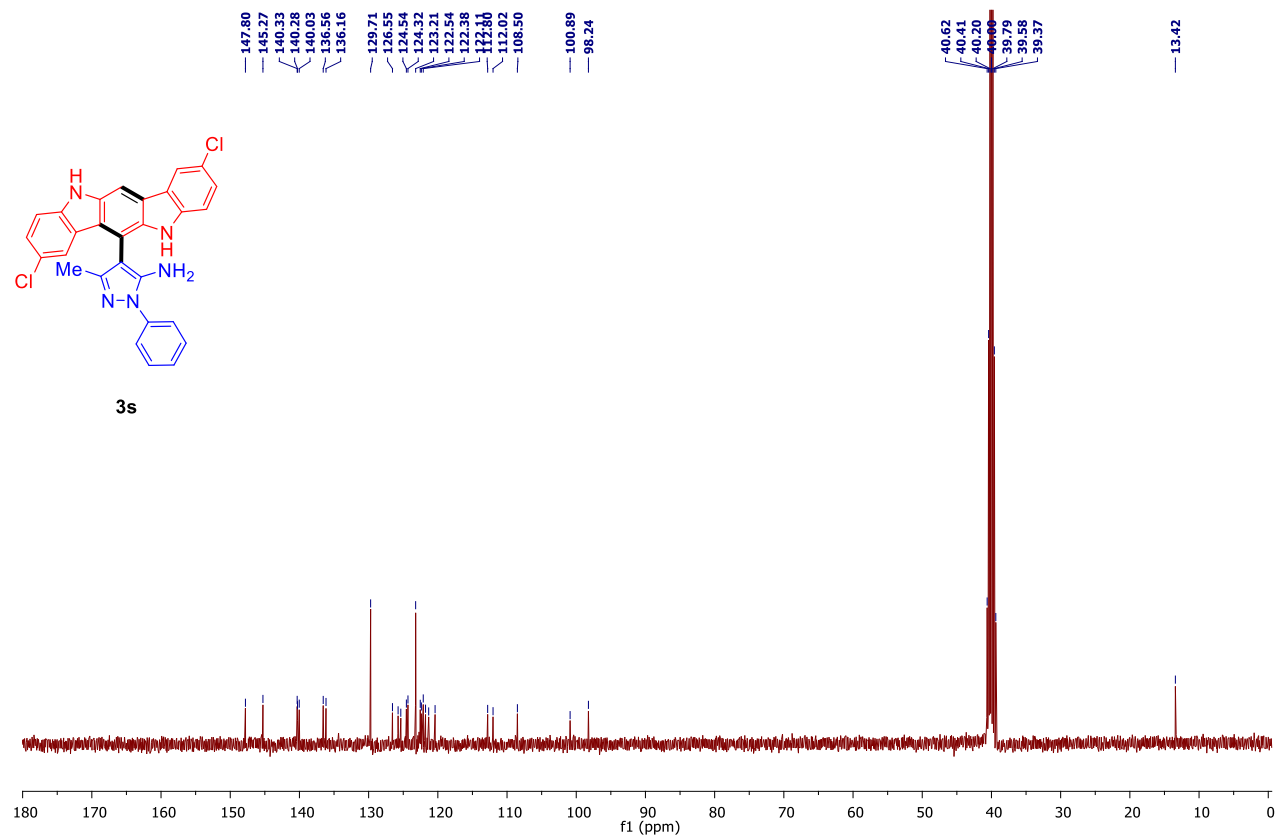

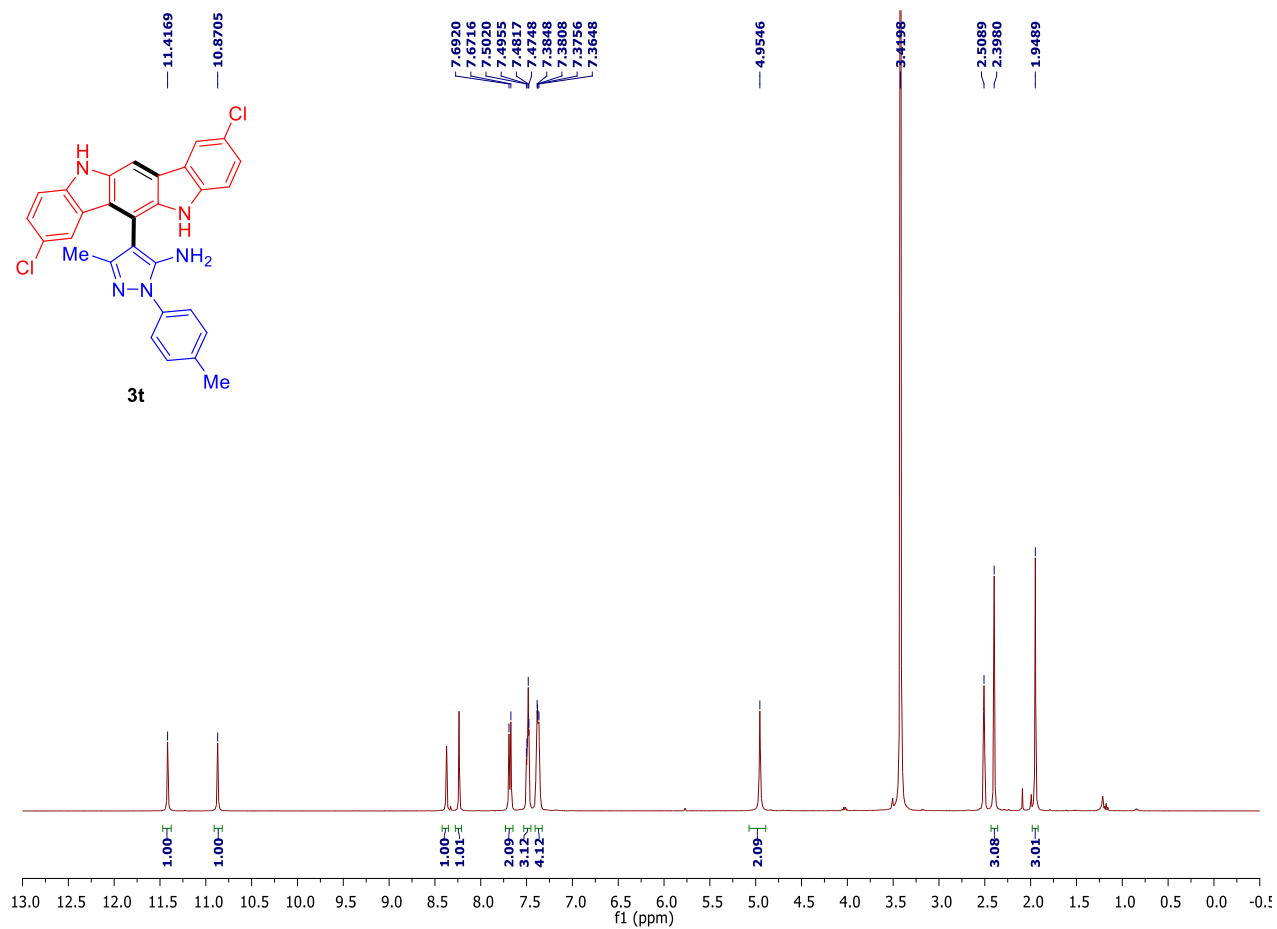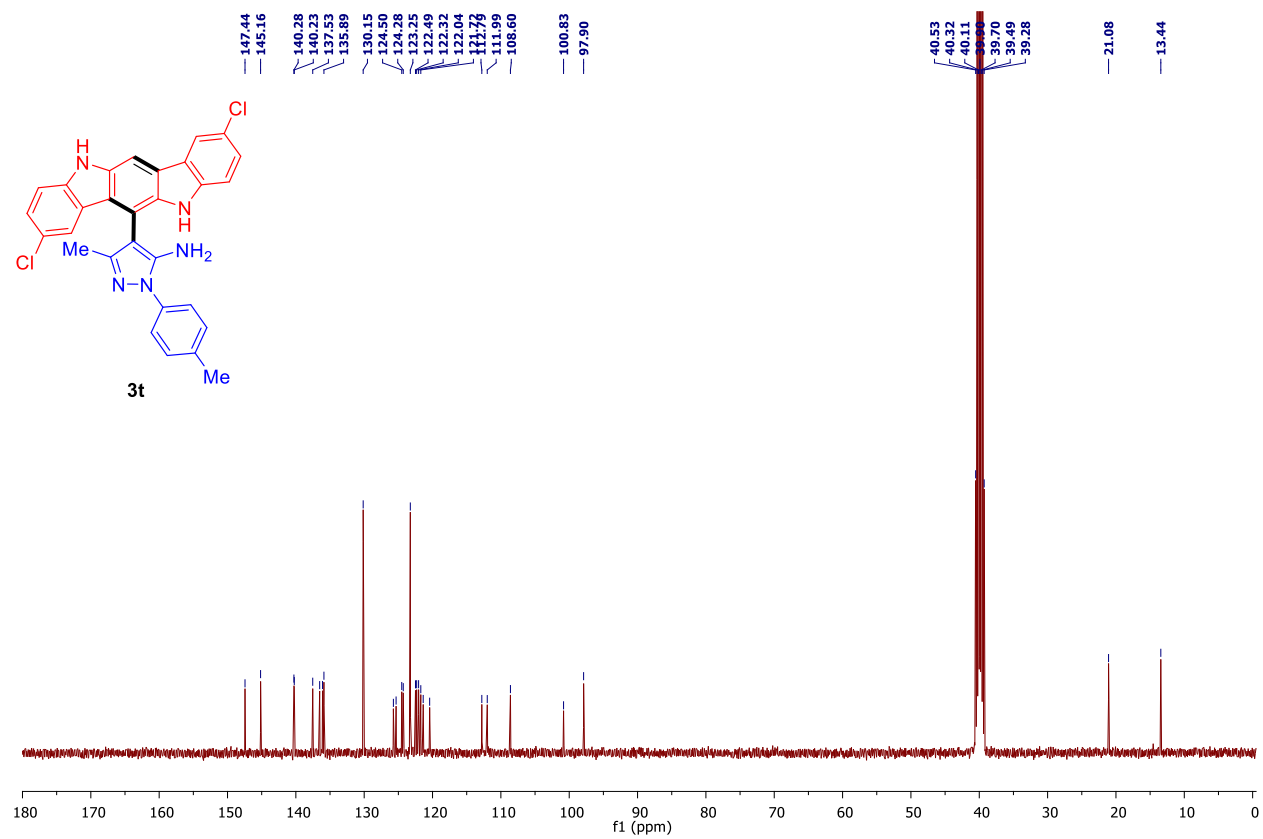

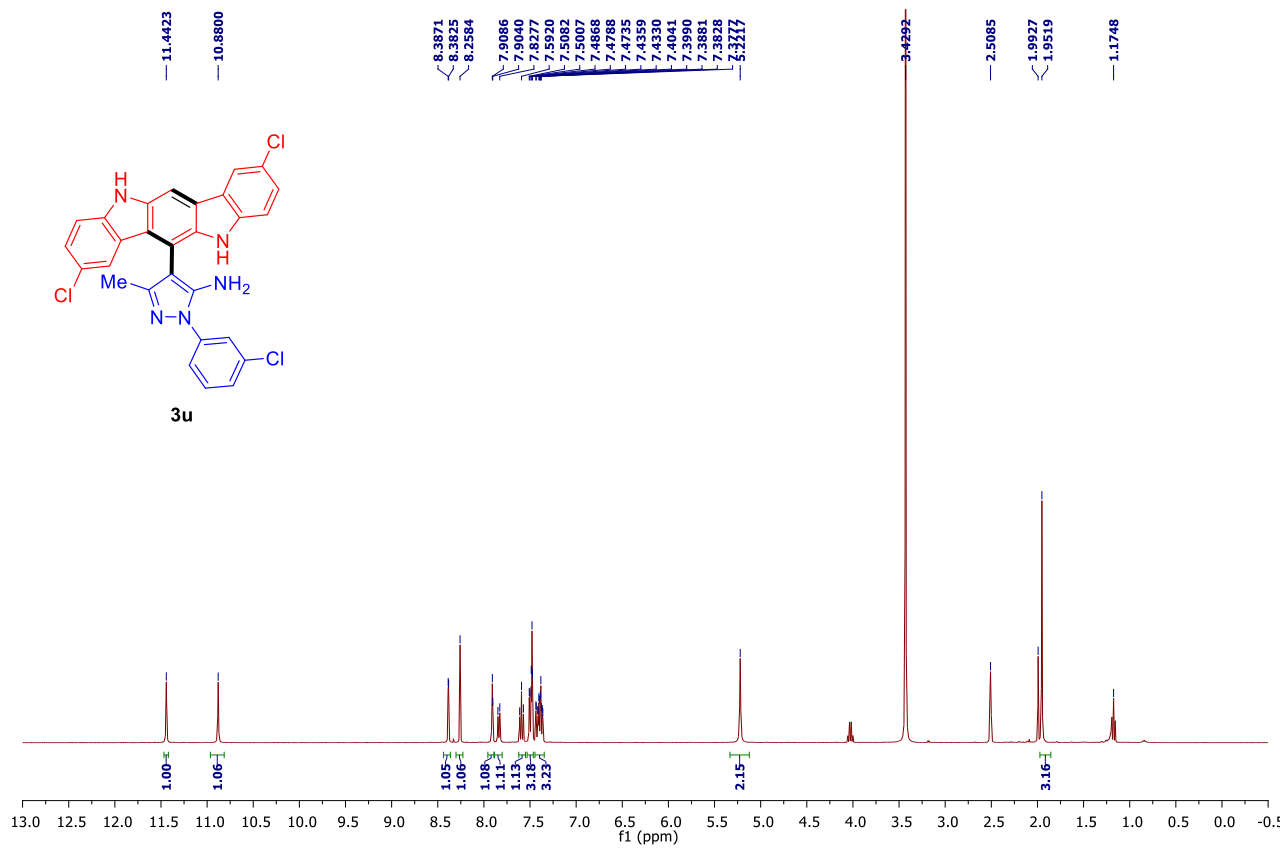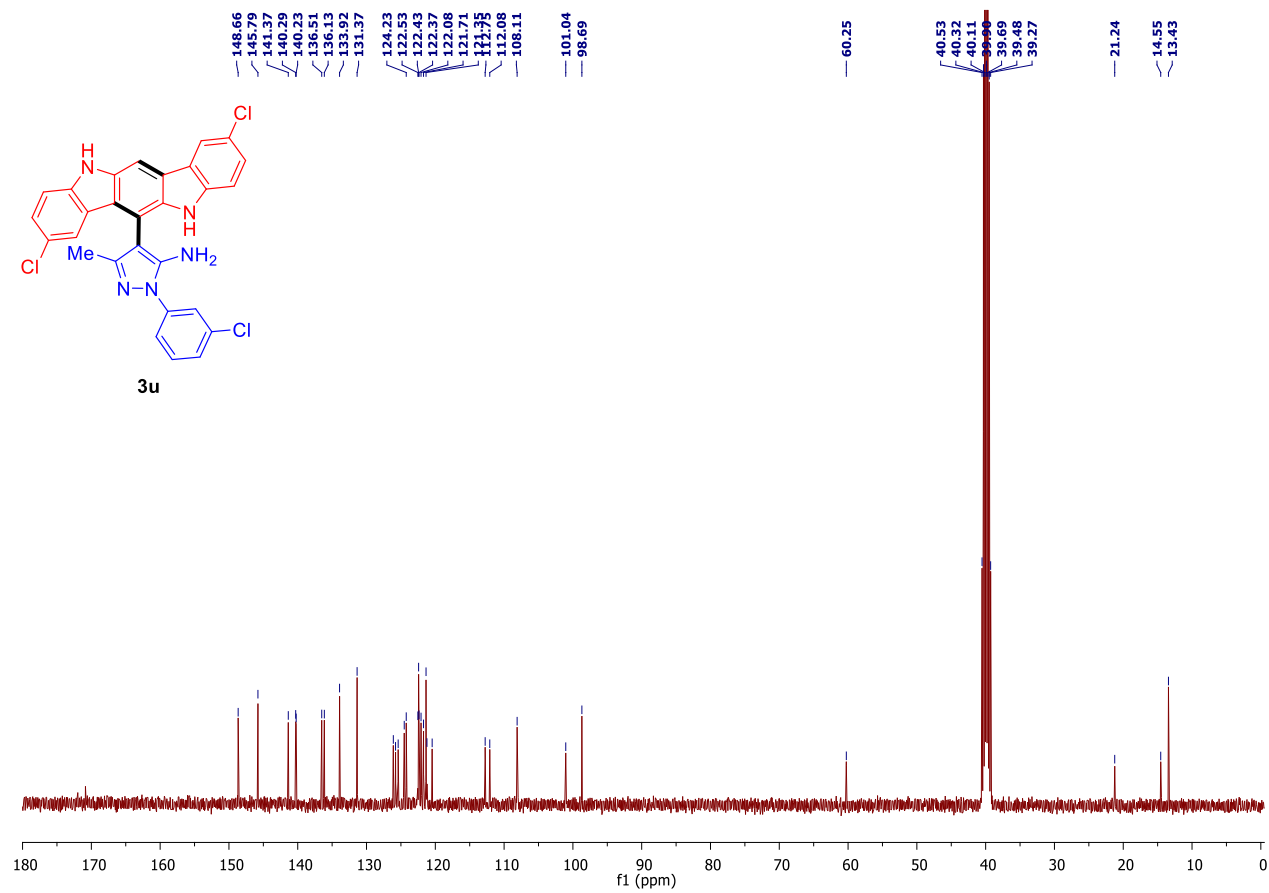



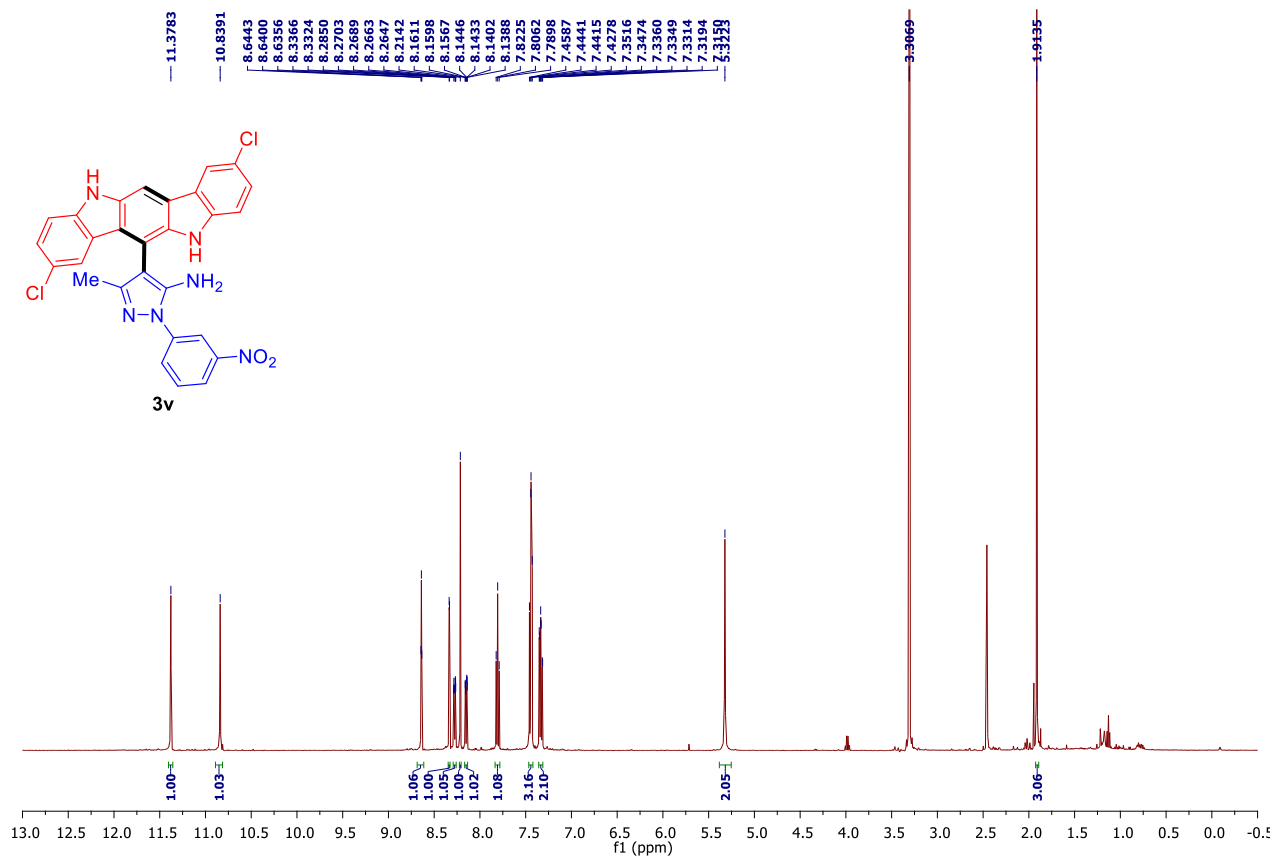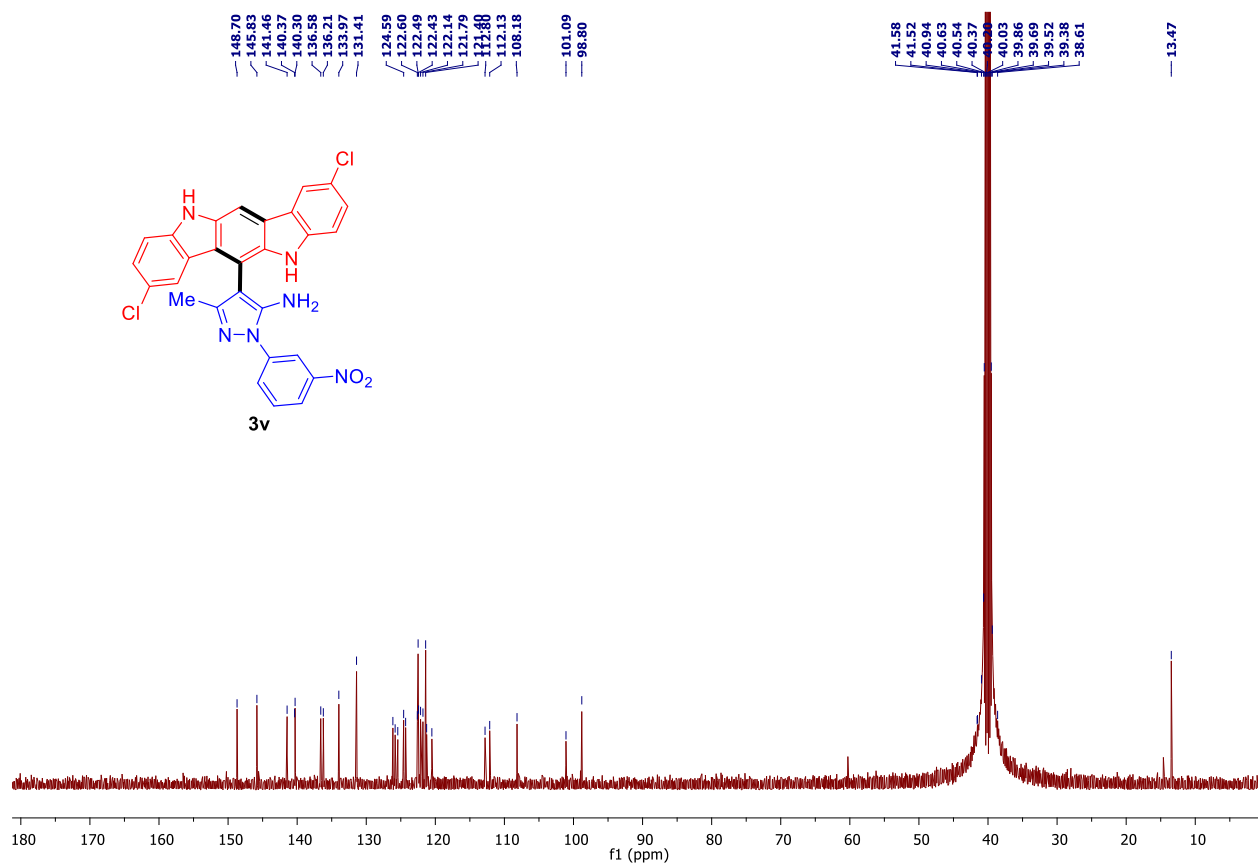

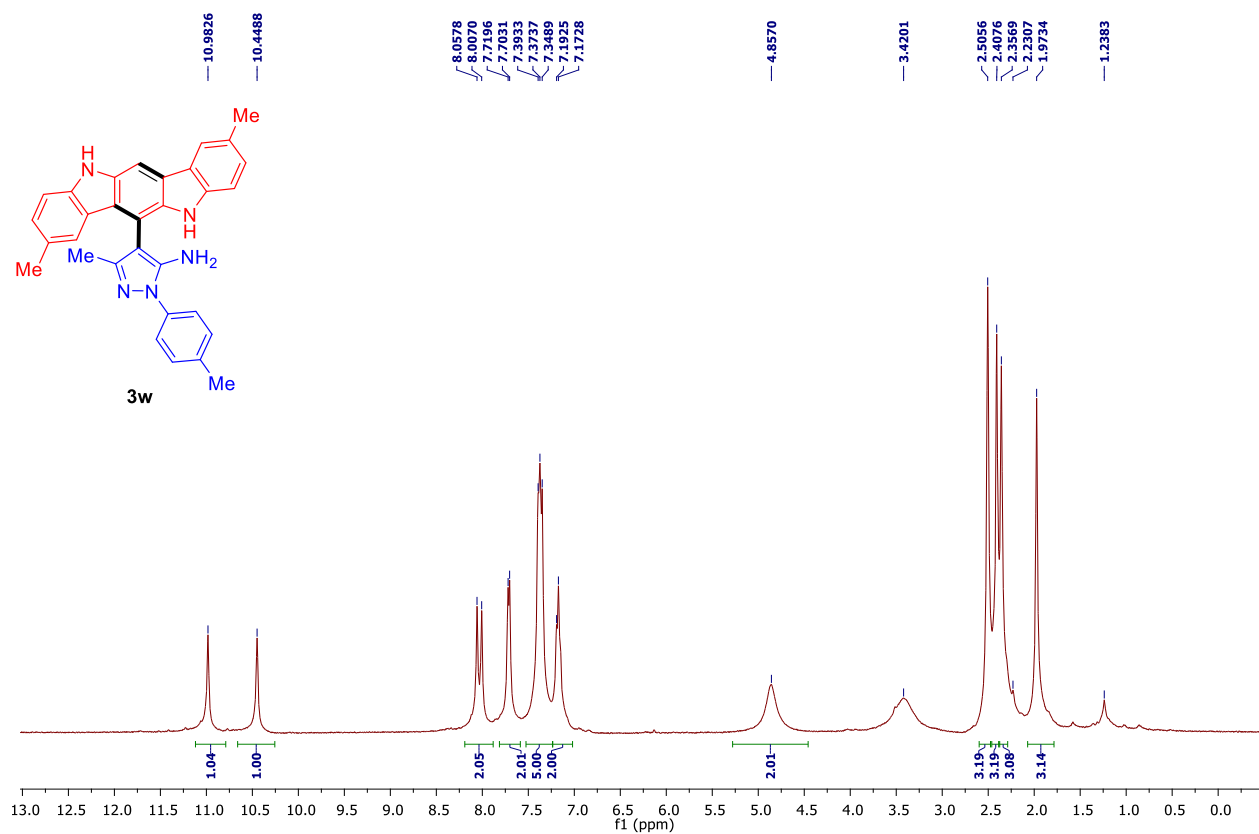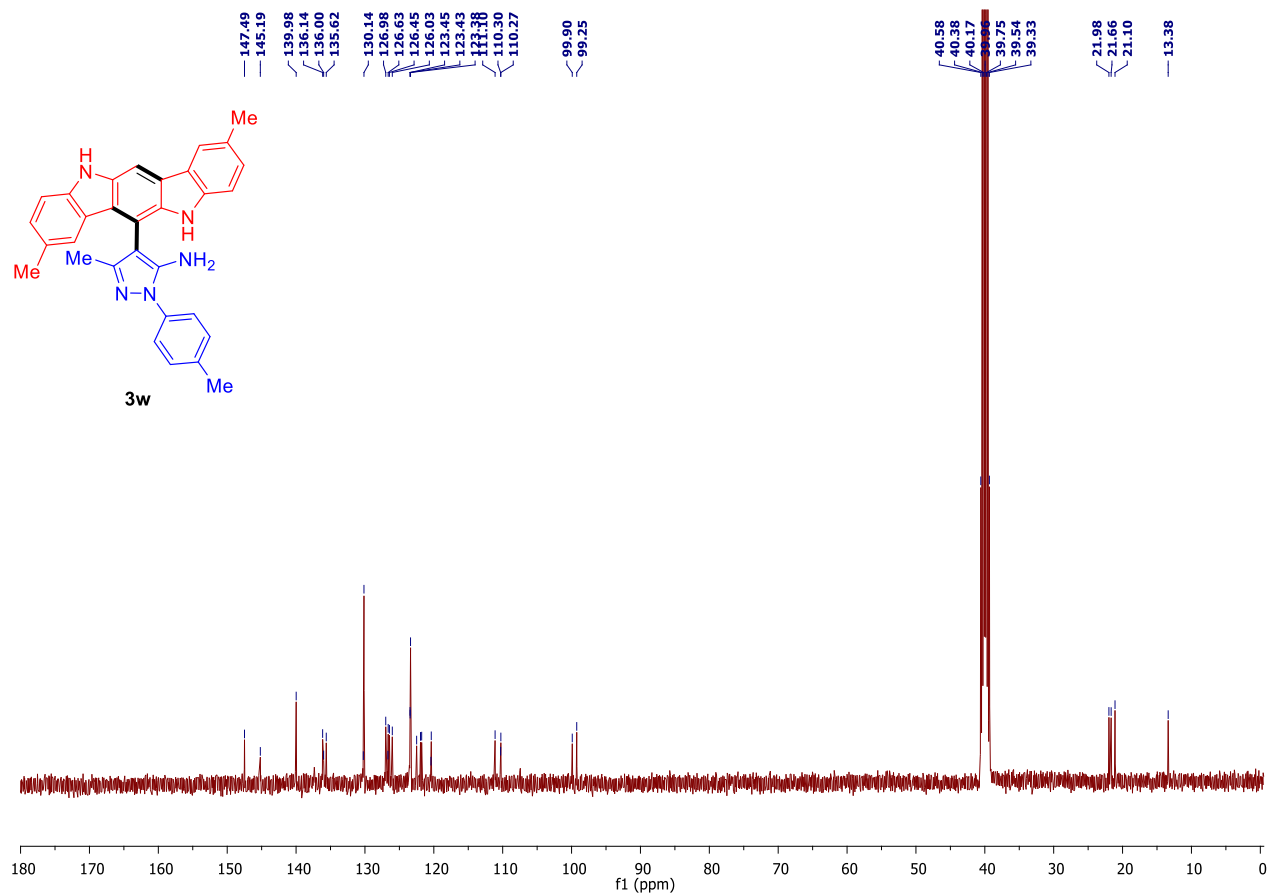

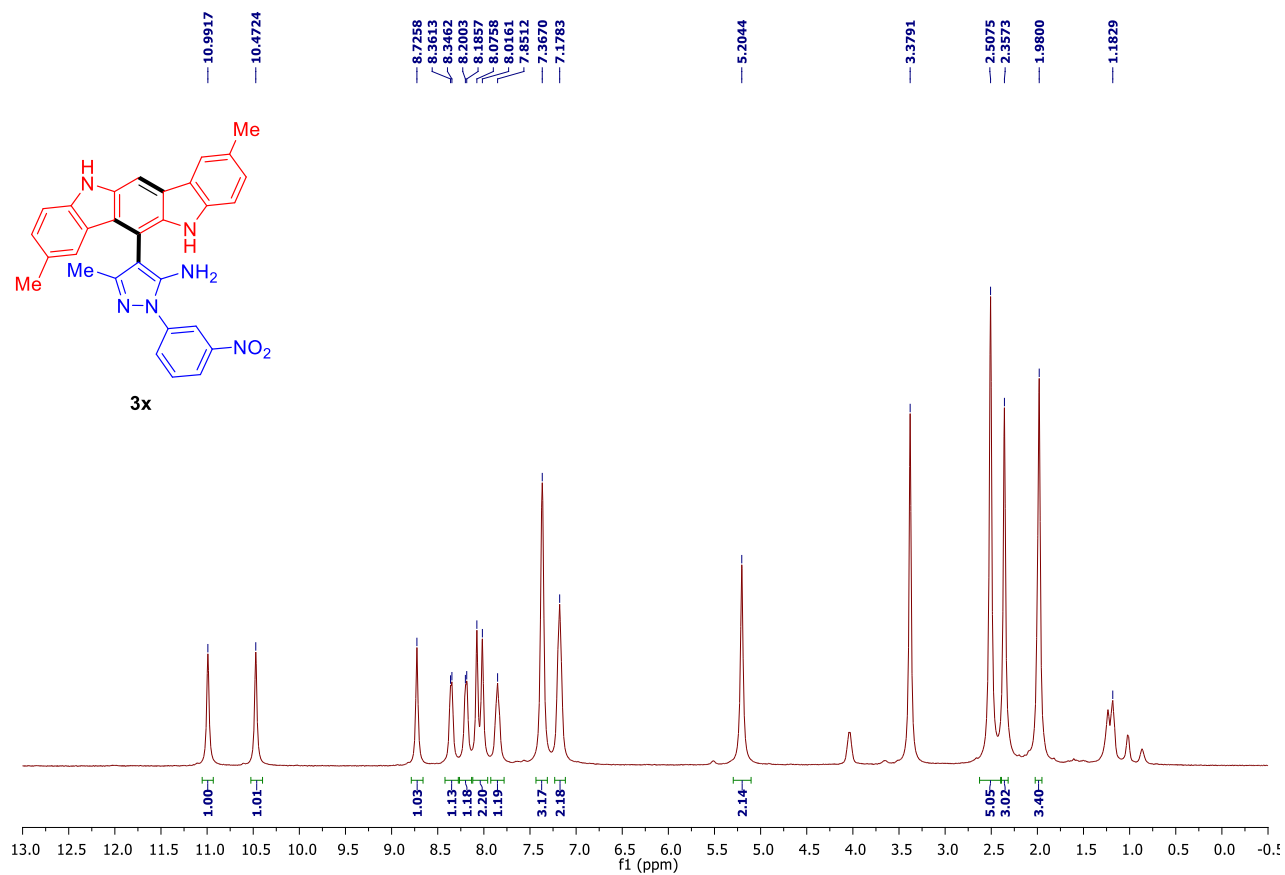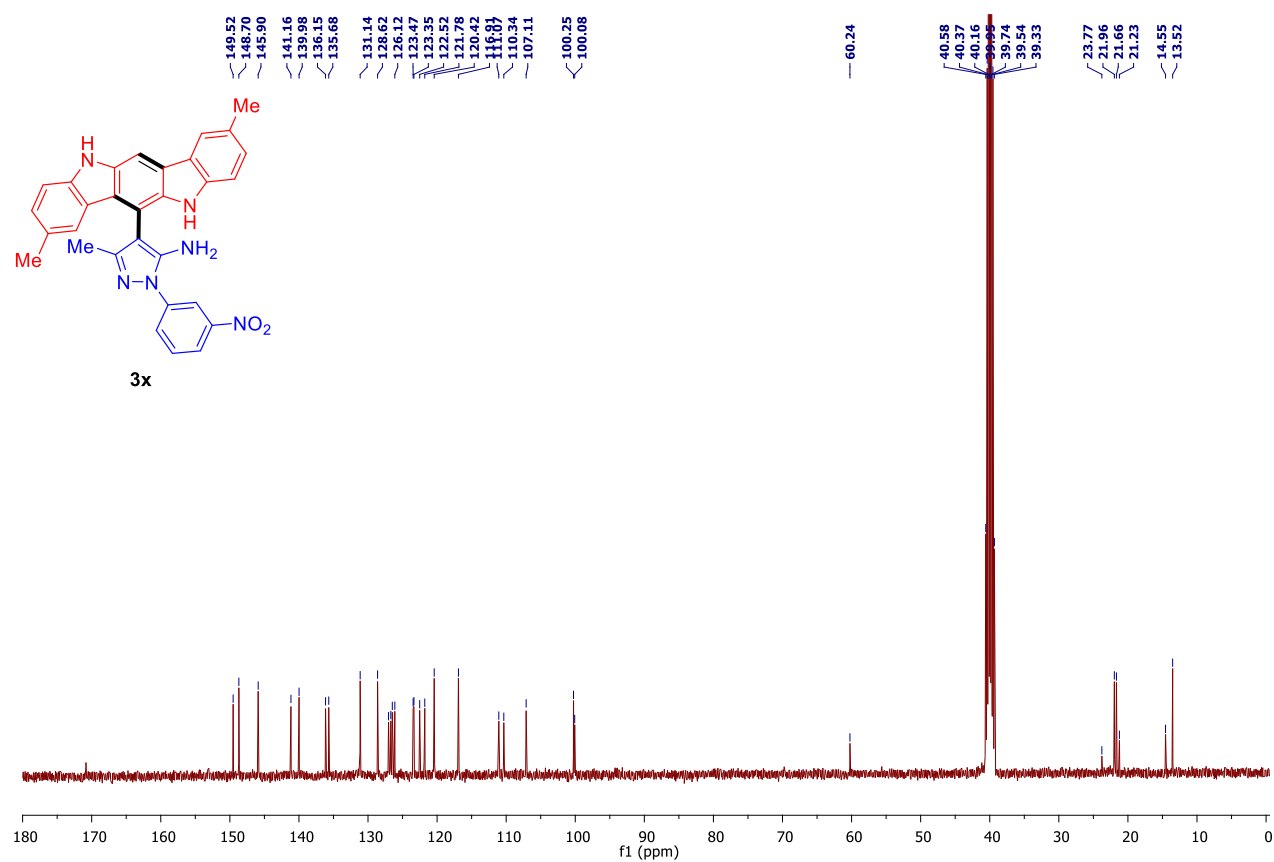

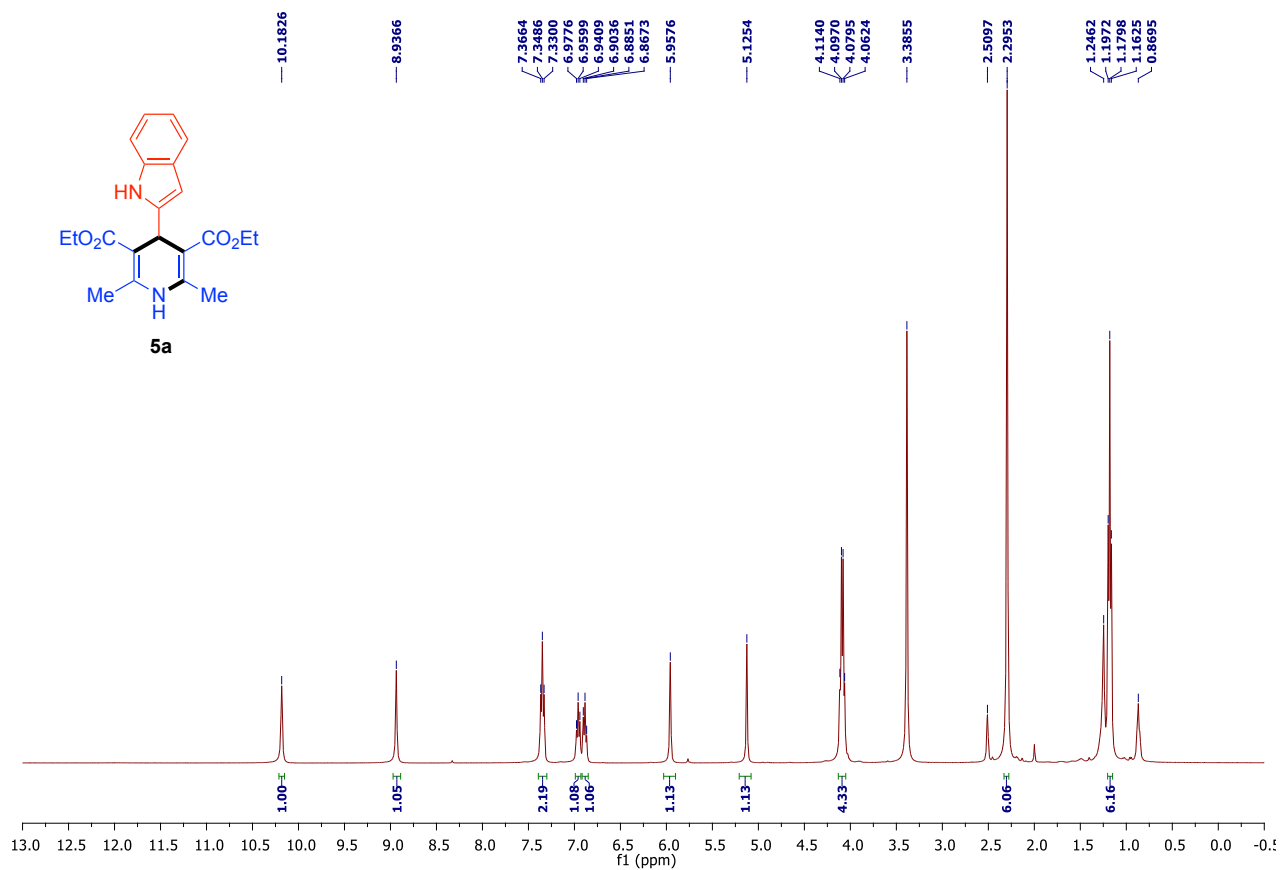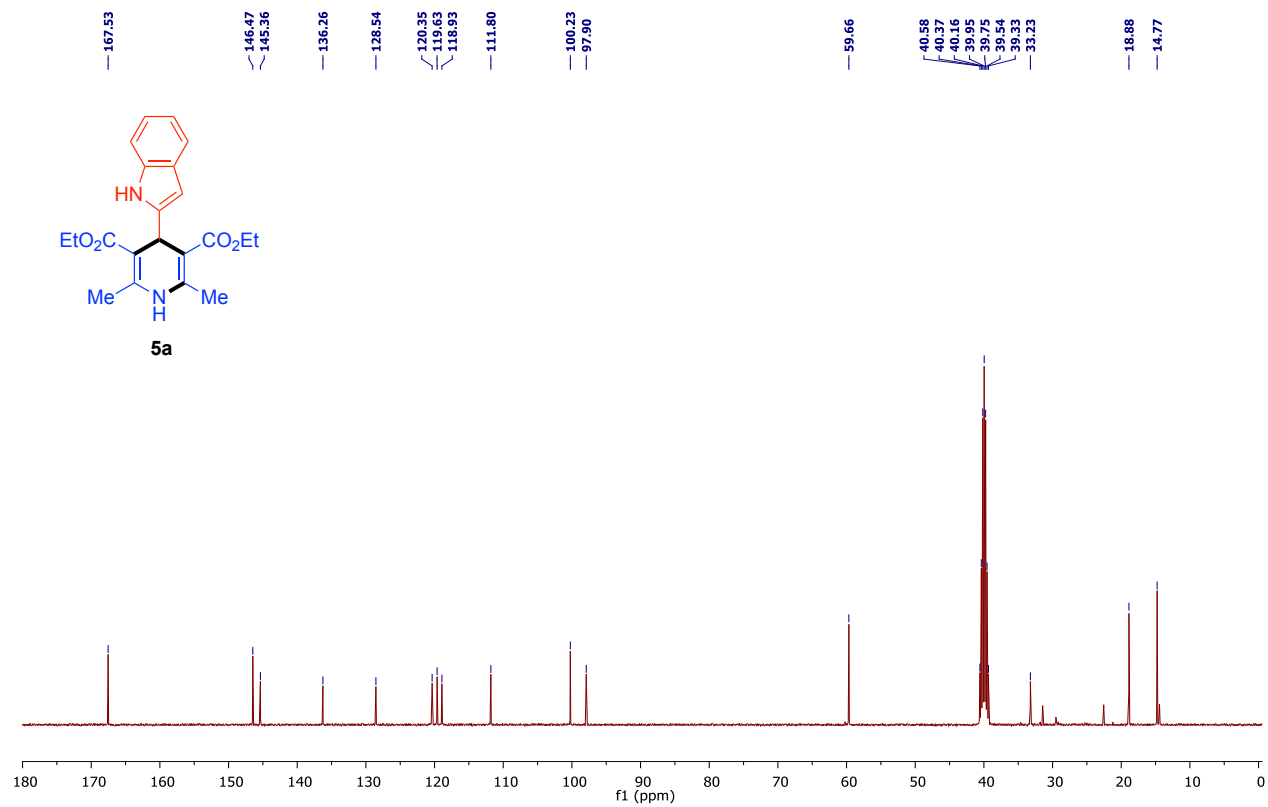

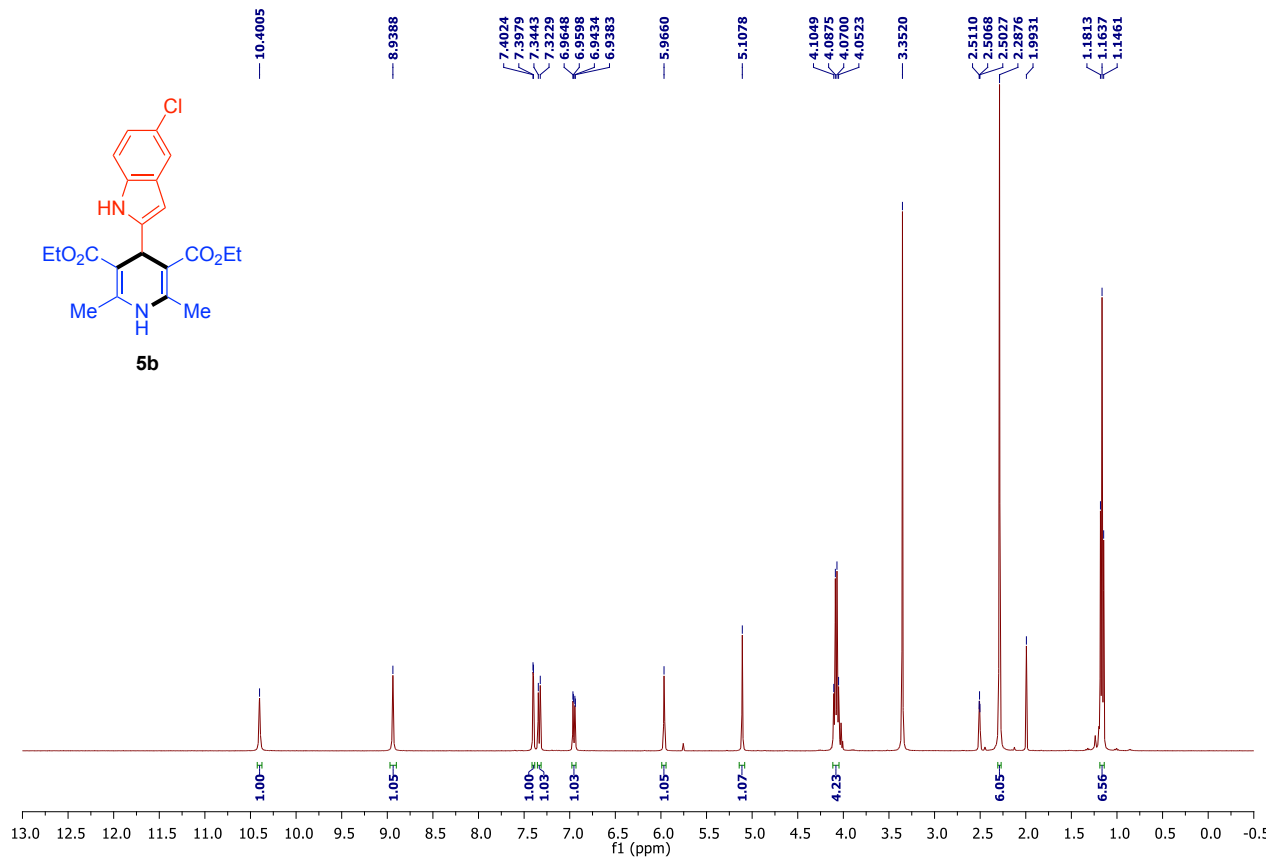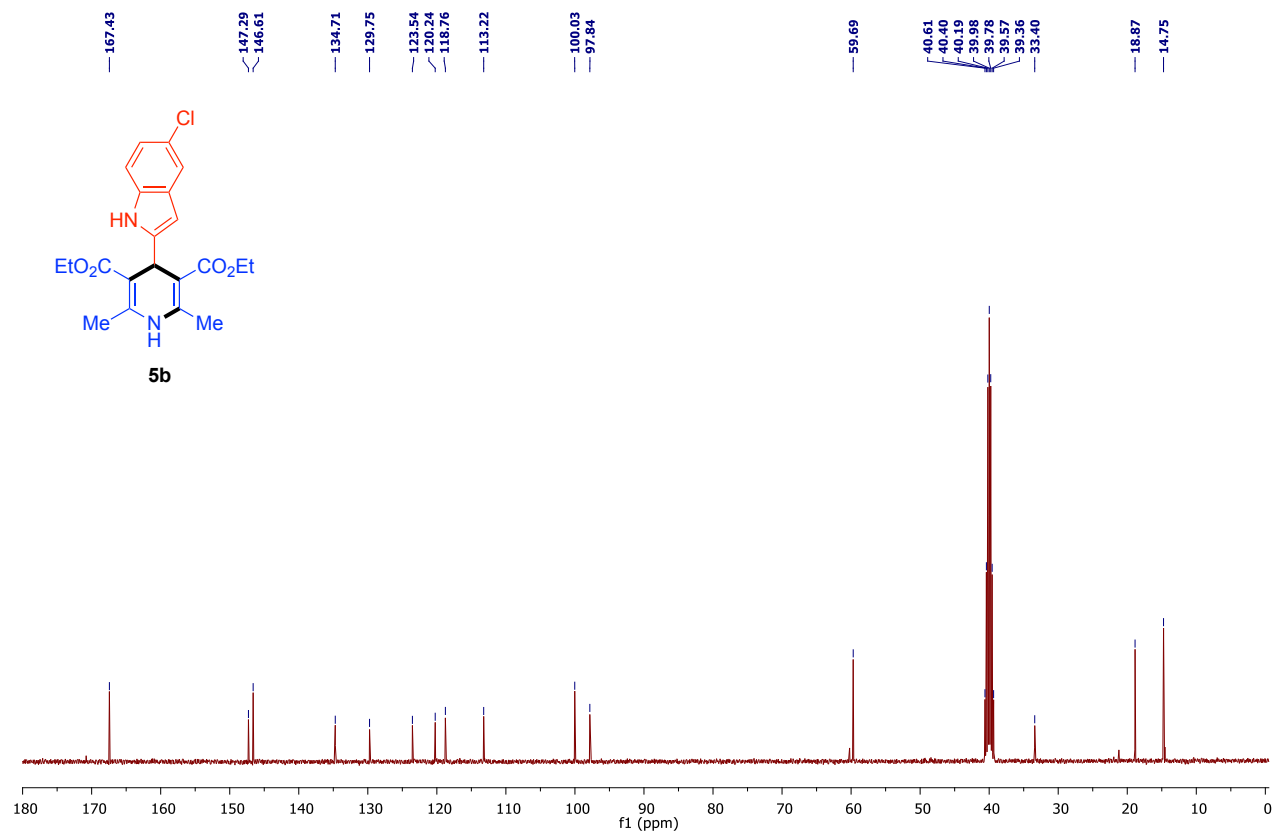

Supplement: d3qo01529g1.pdf [file d3qo01529g1.pdf]
